# Supplementary material for: Neighboring group-directed asymmetric [2 + 2 + 2] cycloaddition to access C–N axially chiral indoles
Source: Royal Society of Chemistry journal article supplement (doi:10.1039/d4qo00042k), 2024-01-01
Supplement: d4qo00042k1.pdf [file d4qo00042k1.pdf]

# Supporting Information

## Neighboring Group-Directed [2+2+2] Cycloaddition to Access C-N Axially Chiral Indoles

Xuan Zhang,<sup>a</sup> Qi Teng,<sup>\*a</sup> Yanru Ren,<sup>a</sup> Baitong Wei,<sup>a</sup> Chen-Ho Tung,<sup>a</sup> and Zhenghu Xu<sup>\*a,b,c</sup>

*a.* Key Lab for Colloid and Interface Chemistry of Education Ministry, School of chemistry and Chemical Engineering, Shandong University, Jinan 250100, People's Republic of China. E-mail: xuzh@sdu.edu.cn

*b.* State Key Laboratory of Organometallic Chemistry Shanghai Institute of Organic Chemistry, Chinese Academy of Sciences Shanghai 200032, PR China.

*c.* Key Laboratory of Precise Synthesis of Functional Molecules of Zhejiang Province, School of Science, Westlake University, No. 18 Shilongshan Road, Hangzhou 310024, China.

Correspondence and requests for materials should be addressed to Z. X. (xuzh@sdu.edu.cn).

### List of Contents

|                                                                                |     |
|--------------------------------------------------------------------------------|-----|
| 1. General information.....                                                    | S2  |
| 2. Optimization of the reaction conditions.....                                | S3  |
| 3. Procedure for the [2+2+2] cycloaddition reaction.....                       | S4  |
| 4. Thermal racemization experiments.....                                       | S5  |
| 5. Gram-scale experiment and synthetic applications.....                       | S6  |
| 6. X-ray crystallographic data for <b>3n</b> .....                             | S10 |
| 7. Characterization of Products <b>3a-3c</b> , <b>3e-3x</b> , <b>5-9</b> ..... | S10 |
| 8. NMR spectra.....                                                            | S56 |
| 9. References.....                                                             | S84 |

## 1. General information

The solvents used in the reaction were dried by  $\text{CaH}_2$  or purchased from J&K or local companies unless additional notes, and all the reagents were obtained commercially and used without further purification. All the reactions were performed in the overdried glassware with magnetic stirring under nitrogen atmosphere. Column chromatography was performed with silica gel (100-200 mesh) as the stationary phase. Solvent compositions are given in (v/v). Reactions were monitored by TLC. All NMR spectra were recorded on Bruker-500 MHz spectrometer in  $\text{CDCl}_3$ , and the chemical shifts ( $\delta$ ) and coupling constants ( $J$ ) were expressed in ppm and Hz respectively. High resolution mass spectra (HRMS) were measured on the Bruker-Impact II instruments obtained by the Analytical Center for Structural Constituent and Physical Property in Shandong University. All substitutes were prepared according to the reported methods.<sup>1-5</sup>

## 2. Optimization of the reaction conditions

**Table S1.** Investigation of the conditions for the construction of C-N axially chiral biaryls.<sup>[a]</sup>

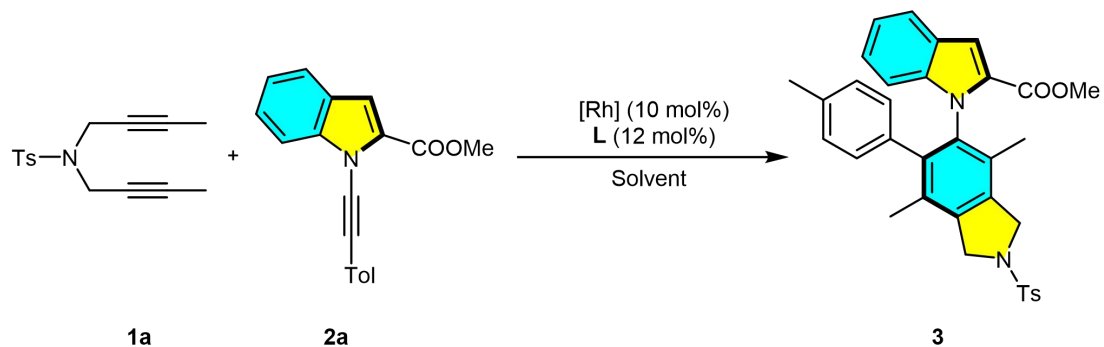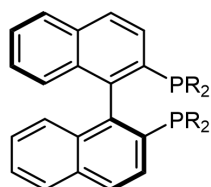

- L1: R = Ph  
L2: R = 3,5-(Me)<sub>2</sub>-C<sub>6</sub>H<sub>3</sub>  
L3: R = 4-Me-C<sub>6</sub>H<sub>4</sub>

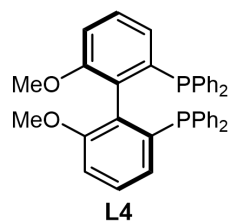

L4

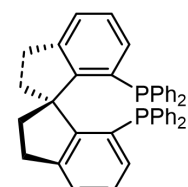

L5

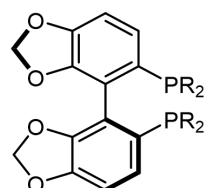

- L6: R = Ph

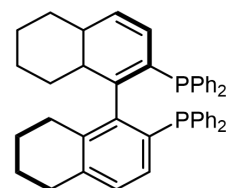

L7

| entry             | metal                                    | ligand    | solvent                    | additive             | temperature | yield/% <sup>[b]</sup> | e.e./% <sup>[c]</sup> |
|-------------------|------------------------------------------|-----------|----------------------------|----------------------|-------------|------------------------|-----------------------|
| 1                 | Rh(COD) <sub>2</sub> BF <sub>4</sub>     | L1        | DCE                        | -                    | 0           | n.r.                   | -                     |
| 2 <sup>[d]</sup>  | Rh(COD) <sub>2</sub> BF <sub>4</sub>     | L1        | DCE                        | -                    | 23          | 42                     | 98                    |
| 3                 | Rh(COD) <sub>2</sub> BF <sub>4</sub>     | L1        | DCE                        | -                    | 40          | 32                     | 97                    |
| 4                 | Rh(COD) <sub>2</sub> BF <sub>4</sub>     | L1        | DCE                        | -                    | 60          | 48                     | 97                    |
| 5                 | Rh(COD) <sub>2</sub> BF <sub>4</sub>     | L1        | DCE                        | Sc(OTf) <sub>3</sub> | 40          | n.r.                   | -                     |
| 6                 | Rh(COD) <sub>2</sub> BF <sub>4</sub>     | L1        | DCE                        | Y(OTf) <sub>3</sub>  | 40          | n.r.                   | -                     |
| 7                 | Rh(COD) <sub>2</sub> BF <sub>4</sub>     | L1        | DCE                        | Ni(OTf) <sub>2</sub> | 40          | 64                     | 98                    |
| 8                 | Rh(COD) <sub>2</sub> BF <sub>4</sub>     | L1        | DCE:CH <sub>3</sub> OH=3:1 | -                    | 40          | 66                     | 97                    |
| 9                 | Rh(COD) <sub>2</sub> BF <sub>4</sub>     | L1        | CH <sub>3</sub> OH         | -                    | 40          | 69                     | 97                    |
| 10                | Rh(COD) <sub>2</sub> BF <sub>4</sub>     | L1        | DCM                        | -                    | 40          | 25                     | -                     |
| 11                | Rh(COD) <sub>2</sub> BF <sub>4</sub>     | L1        | Acetone                    | -                    | 40          | 32                     | -                     |
| 12                | Rh(COD) <sub>2</sub> BF <sub>4</sub>     | L1        | PhMe                       | -                    | 40          | 12                     | -                     |
| 13                | Rh(COD) <sub>2</sub> BF <sub>4</sub>     | L1        | CH <sub>3</sub> CN         | -                    | 40          | trace                  | -                     |
| 14                | Rh(COD) <sub>2</sub> BF <sub>4</sub>     | L1        | Cyclohexane                | -                    | 40          | trace                  | -                     |
| 15                | Rh(COD) <sub>2</sub> BF <sub>4</sub>     | L1        | CH <sub>3</sub> OH         | LiOTf                | 40          | 72                     | 97                    |
| 16                | Rh(COD) <sub>2</sub> BF <sub>4</sub>     | L1        | CH <sub>3</sub> OH         | Ni(OTf) <sub>2</sub> | 40          | 74                     | 97                    |
| 17                | Rh(COD) <sub>2</sub> BF <sub>4</sub>     | L1        | CH <sub>3</sub> OH         | Cu(OTf) <sub>2</sub> | 40          | 76                     | 96                    |
| 18                | [Rh(COD)Cl] <sub>2</sub>                 | L1        | CH <sub>3</sub> OH         | -                    | 40          | 38                     | 93                    |
| 19 <sup>[e]</sup> | Rh(COD) <sub>2</sub> BF <sub>4</sub>     | L1        | CH <sub>3</sub> OH         | -                    | 40          | 59                     | -                     |
| 20                | Rh(COD) <sub>2</sub> BF <sub>4</sub>     | L2        | CH <sub>3</sub> OH         | -                    | 40          | 47                     | 90                    |
| 21                | Rh(COD) <sub>2</sub> BF <sub>4</sub>     | L3        | CH <sub>3</sub> OH         | -                    | 40          | 81                     | 95                    |
| 22                | Rh(COD) <sub>2</sub> BF <sub>4</sub>     | L4        | CH <sub>3</sub> OH         | -                    | 40          | 89                     | 97                    |
| 23                | Rh(COD) <sub>2</sub> BF <sub>4</sub>     | L5        | CH <sub>3</sub> OH         | -                    | 40          | 72                     | -63                   |
| <b>24</b>         | <b>Rh(COD)<sub>2</sub>BF<sub>4</sub></b> | <b>L6</b> | <b>CH<sub>3</sub>OH</b>    | -                    | <b>40</b>   | <b>93</b>              | <b>98</b>             |
| 25                | Rh(COD) <sub>2</sub> BF <sub>4</sub>     | L7        | CH <sub>3</sub> OH         | -                    | 40          | 65                     | -90                   |
| 26 <sup>[f]</sup> | Rh(COD) <sub>2</sub> BF <sub>4</sub>     | L6        | CH <sub>3</sub> OH         | -                    | 40          | 44                     | 98                    |
| 27 <sup>[f]</sup> | Rh(COD) <sub>2</sub> BF <sub>4</sub>     | L6        | CH <sub>3</sub> OH         | Zn(OTf) <sub>2</sub> | 40          | 73                     | 98                    |

[a] Reaction conditions: A mixture of **1** (0.1 mmol), **2** (0.15 mmol), metal (10 mol%), ligand (12 mol%), solvent (2 mL) under N<sub>2</sub> for 12 hours. [b] Isolated yields. [c] Determined by HPLC analysis using a chiral stationary phase. [d] Extend the reaction time to 48 hours. [e] Slowly add a CH<sub>3</sub>OH (1 mL) solution of **1** (0.1 mmol) to a CH<sub>3</sub>OH (1 mL) solution of **2** (0.15 mmol) at a constant rate in 3 hours; [f] Change the amount of Rh(COD)<sub>2</sub>BF<sub>4</sub> to 2.5 mol%.

### 3. Procedure for the [2+2+2] Cycloaddition reaction.

General procedure for the asymmetric synthesis of **3**

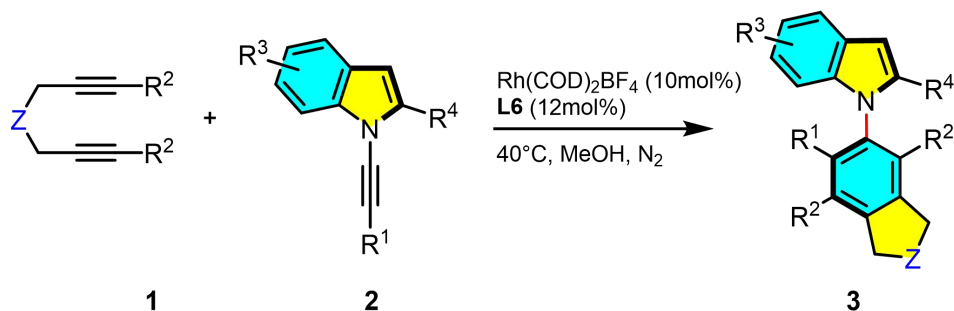

N-alkynyl indole **2** (0.15 mmol, 1.5 equiv.), diyne **1** (0.1 mmol, 1.0 equiv.), Rh(COD)<sub>2</sub>BF<sub>4</sub> (4.1 mg, 0.010 mmol, 10 mol%), and **L6** (7.3 mg, 0.012 mmol, 12



mol%) were dissolved in dried solvent of CH<sub>3</sub>OH (2.0 mL). The mixture were heated to 40 °C and stirred for 12 h in a water bath. The reaction was monitored by TLC. The mixture was allowed to cool down to the room temperature and concentrated in vacuo. The residue was purified by silica gel (100-200 mesh) column chromatography to get the corresponding product **3**.

#### 4. Thermal racemization experiments

We studied the configurational stability of **3e** at 120 °C. 20 mg of **3e** (99% ee) was dissolved PhCH<sub>3</sub> and heated in a sealed tube for the corresponding time. The configuration remains very stable and no racemization occurred in 72 hrs.

**Table S2.** Thermal racemization experiments

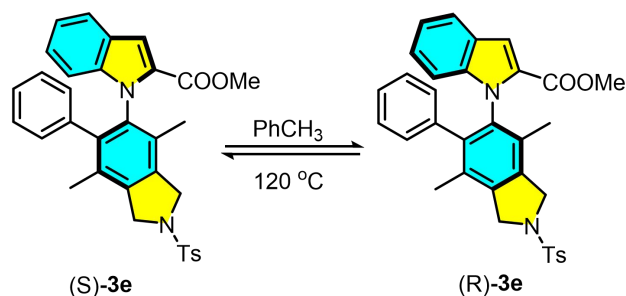

| <b>3e</b> |        |
|-----------|--------|
| time/h    | ee (%) |
| 0         | 99     |
| 1         | 99     |
| 2         | 99     |
| 4         | 99     |
| 6         | 99     |
| 12        | 99     |
| 24        | 99     |
| 36        | 99     |
| 48        | 99     |
| 60        | 99     |
| 72        | 99     |

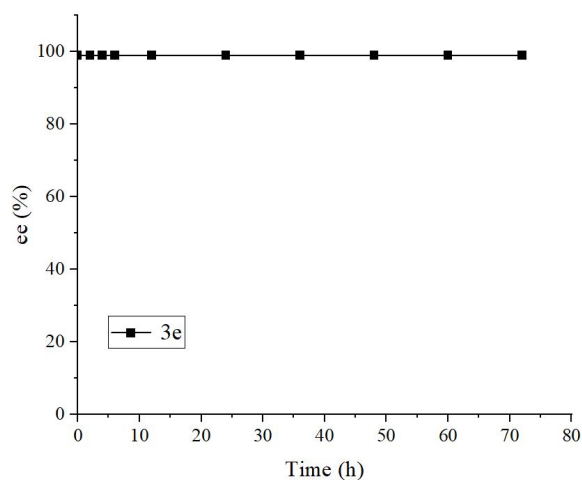

**Figure S1.** Thermal racemization experiments

## 5. Gram-scale experiment and synthetic applications

### 5.1 Gram-scale experiment

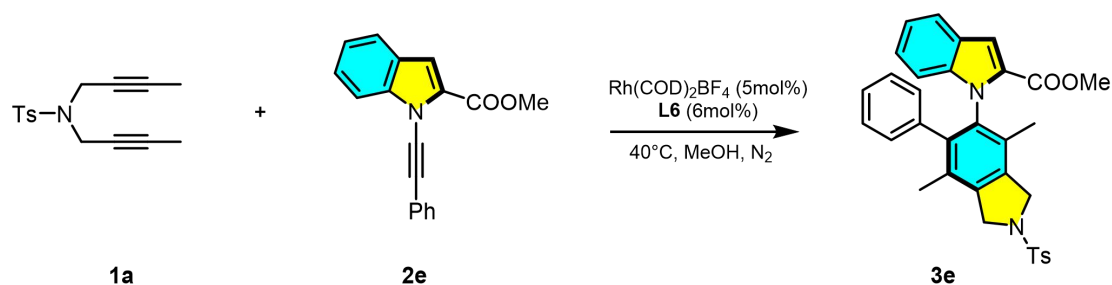

N-alkynyl indole **2e** (434 mg, 1.5 mmol, 1.5 equiv.), diene **1a** (275.4 mg, 1 mmol, 1.0 equiv.), Rh(COD)<sub>2</sub>BF<sub>4</sub> (20.3 mg, 0.05 mmol, 5 mol%), and L6 (36.63 mg, 0.06 mmol, 6 mol%) were dissolved in dried solvent of CH<sub>3</sub>OH (20.0 mL). The mixture were heated to 40 °C and stirred for 12 h in a water bath. The reaction was monitored by TLC. The mixture was allowed to cool down to the room temperature and concentrated in vacuo. The residue was purified by silica gel (100-200 mesh) column chromatography with petroleum ether/ethyl acetate (10:1) as eluent to get the corresponding **3e** (0.385 g, 70% yield, 99% ee).

### 5.2 Synthesis of **5** via an iodination and a Heck coupling reaction

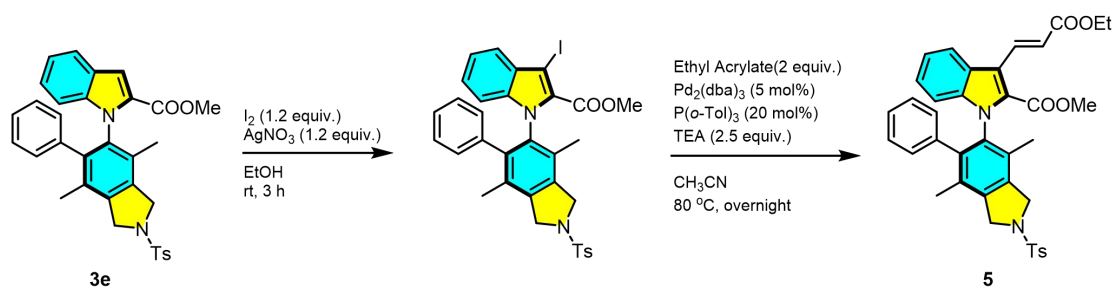

To a solution of **3e** (110.0 mg, 0.2 mmol, 1.0 equiv.) and AgNO<sub>3</sub> (40.8 mg, 0.24 mmol, 1.2 equiv.) in ethanol (0.25 mL) were added iodine (60.9 mg, 0.24 mmol, 1.2 equiv.) in ethanol (0.35 mL) under air at the room temperature. The mixture was kept in the dark and stirred at the ambient environment for 10 h. The reaction was monitored by NMR. The mixture was poured into saturated Na<sub>2</sub>S<sub>2</sub>O<sub>3</sub> solution and extracted by ethyl acetate (3 x 10 mL), and the organic phase was dried by Na<sub>2</sub>SO<sub>4</sub> and concentrated in vacuo to obtain the raw product.

To a solution of raw product in CH<sub>3</sub>CN (1.0 mL) were added ethyl acrylate (22.0 μL, 0.20 mmol, 2.0 equiv.), Pd<sub>2</sub>(dba)<sub>3</sub> (4.6 mg, 0.005 mmol, 5 mol%), P(*o*-Tol)<sub>3</sub> (6.1 mg, 0.020 mmol, 20 mol%) and triethylamine (35.0 μL, 0.25 mmol, 2.5 equiv.) under nitrogen atmosphere. The mixture was heated to 80 °C and stirred overnight. The reaction was monitored by TLC. After the reacts were consumed completely, the mixture was poured into water and extracted by dichloromethane (3 x 5 mL). The organic phase was dried by Na<sub>2</sub>SO<sub>4</sub> and concentrated in vacuo. The residue was purified by silica gel (100-200 mesh) column chromatography with petroleum ether/ethyl acetate (8:1) as the eluent to obtain **5** (51.7 mg, white solid, 40% yield, 97% ee).

### 5.3 Synthesis of **6** via a Kulinkovich cyclopropanation

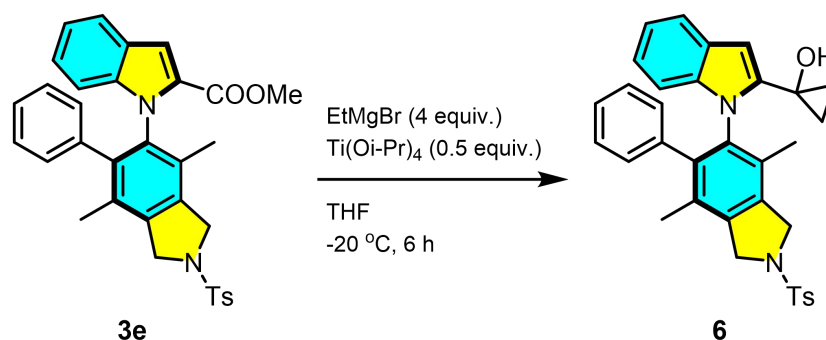

To a solution of **3e** (55.0 mg, 0.10 mmol, 1.0 equiv.) in dried THF (1 mL) was added Ti(Oi-Pr)<sub>4</sub> (14.8 μL, 0.05 mmol, 0.5 equiv.) and EtMgBr (0.13 mL, 3M in diethyl ether, 0.40 mmol, 4 equiv.) dropwise by syringe under nitrogen atmosphere at 0 °C. The mixture was cooled down to -20 °C and stirred for 6 h. The reaction was monitored by TLC. After the reacts were consumed completely, the reaction was allowed to warm to the room temperature and quenched by saturated NH<sub>4</sub>Cl solution. The mixture was extracted by ethyl acetate (3 x 10 mL) and the organic phase was washed with brine. The organic phase was dried by Na<sub>2</sub>SO<sub>4</sub> and concentrated in vacuo. The residue was purified by silica gel (100-200 mesh) column chromatography with petroleum ether/ethyl acetate (8:1) as the eluent to obtain **6** (32.8 mg, white solid, 60% yield, 99% ee).

#### 5.4 Synthesis of **7** via a Grignard reaction

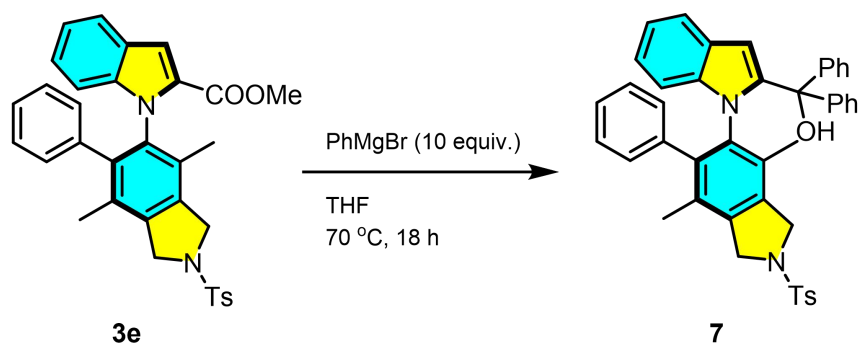

To a solution of **3e** (55.0 mg, 0.1 mmol, 1.0 equiv.) in dried THF (1 mL) was added  $\text{PhMgBr}$  (1.0 mL, 1M in THF, 1.0 mmol, 10 equiv.) dropwise by syringe under nitrogen atmosphere at  $0\text{ }^\circ\text{C}$ . The mixture was heated to  $70\text{ }^\circ\text{C}$  and stirred for 18 h. The reaction was monitored by TLC. After the reacts were consumed completely, the reaction was allowed to cool down to the room temperature and quenched by saturated  $\text{NH}_4\text{Cl}$  solution. The mixture was extracted by ethyl acetate (3 x 10 mL) and the organic phase was washed with brine. The organic phase was dried by  $\text{Na}_2\text{SO}_4$  and concentrated in vacuo. The residue was purified by silica gel (100-200 mesh) column chromatography with petroleum ether/ethyl acetate (8:1) as the eluent to obtain **7** (51.2 mg, white solid, 76% yield, 97% ee).

#### 5.5 Synthesis of **8** via an amination

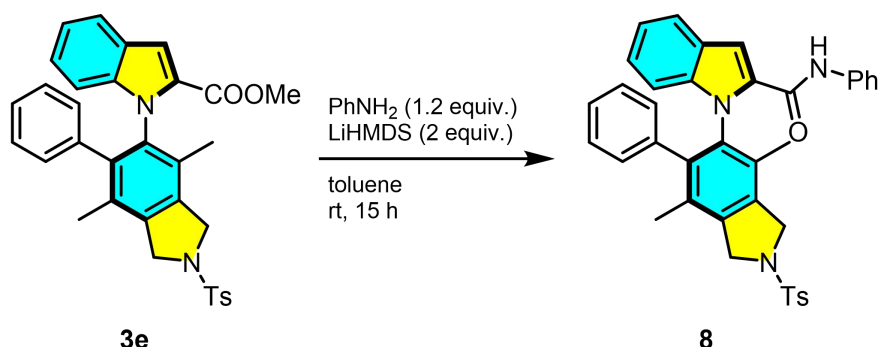

To a solution of **3e** (55.0 mg, 0.10 mmol, 1.0 equiv.) in dried toluene (1 mL) were added aniline (11.0  $\mu\text{L}$ , 0.12 mmol, 1.2 equiv.) and  $\text{LiHMDS}$  (0.20 mL, 1 M in THF, 0.20 mmol, 2.0 equiv.) dropwise by syringe under nitrogen atmosphere at the

room temperature. The mixture was stirred for 15 h at the ambient temperature. The reaction was monitored by TLC. After the reacts were consumed completely, the reaction was allowed to warm to the room temperature and quenched by saturated  $\text{NH}_4\text{Cl}$  solution. The mixture was extracted by ethyl acetate (3 x 5 mL) and the organic phase was washed with water and brine. The organic phase was dried by  $\text{Na}_2\text{SO}_4$  and concentrated in vacuo. The residue was purified by silica gel (100-200 mesh) column chromatography with petroleum ether/ethyl acetate (8:1) as the eluent to obtain **8** (53.1 mg, white solid, 87% yield, 99% ee).

### 5.6 Synthesis of **9** via an oxidative cyclization

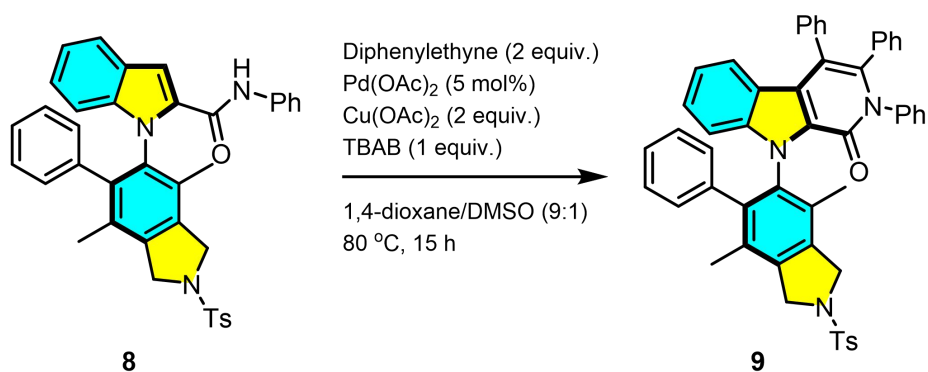

To a solution of **8** (61.1 mg, 0.10 mmol, 1.0 equiv.) and diphenylethyne (35.6 mg, 0.20 mmol, 2.0 equiv.) in a mixed solvent of 1,4-dioxane/DMSO (9:1, 2 mL) were added  $\text{Pd(OAc)}_2$  (1.1 mg, 0.005 mmol, 5 mol%),  $\text{Cu(OAc)}_2$  (36.3 mg, 0.20 mmol, 2.0 equiv.) and TBAB (32.2 mg, 0.10 mmol, 1.0 equiv.). The mixture was heated to 80 °C and stirred for 15 h. The reaction was monitored by TLC. After the reacts were consumed completely, the mixture were filtered on a pad of celite and concentrated in vacuo. The residue was purified by silica gel (100-200 mesh) column chromatography with petroleum ether/ethyl acetate (8:1) as the eluent to obtain **9** (51.1 mg, white solid, 65% yield, 99% ee).

## 6. X-ray crystallographic data for 3n

A suitable crystal was selected and analyzed on a Rigaku XtaLAB Synergy diffractometer. The crystal structures have been deposited at The Cambridge Crystallographic Data Centre (CCDC: 2312158). These data can be obtained free of charge from The Cambridge Crystallographic Data Centre via [www.ccdc.com.ac.uk/data\\_request/cif](http://www.ccdc.com.ac.uk/data_request/cif).

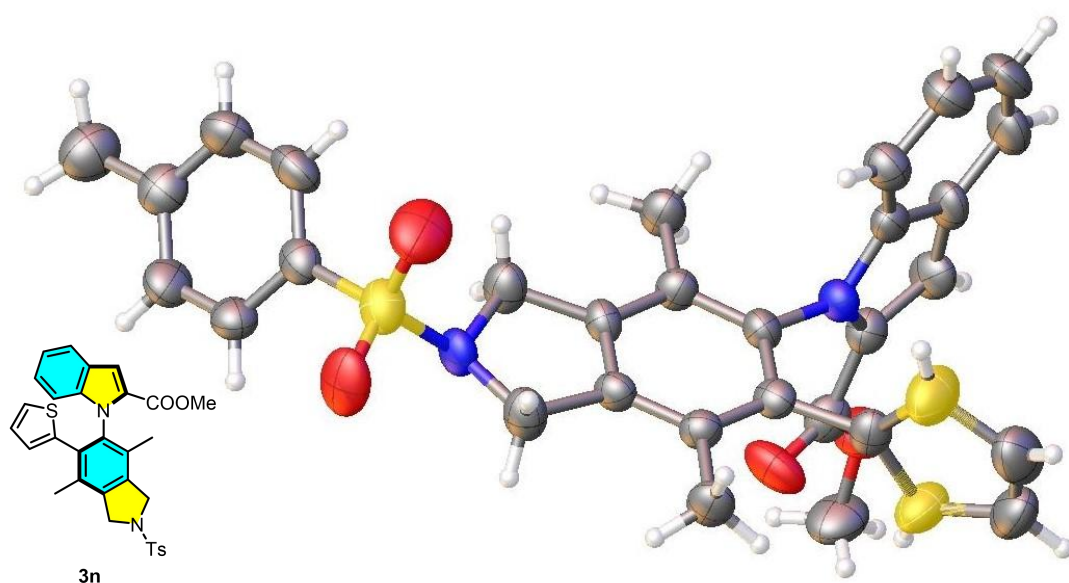

**Figure S2** X-ray crystal structure of **3n** (CCDC: 2312158. Thermal ellipsoids are drawn at 50% probability.)

## 7. Characterization of Products 3a-3c, 3e-3x, 5-9

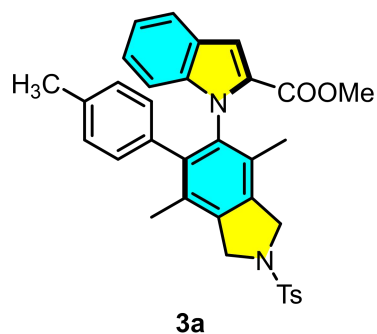

White solid, 53.7 mg, 93% yield, 98% ee. [Chiral HPLC analysis of the product: Daicel Chiralpak AS-H 250X4.6 mm 5u column; *n*-hexane/2-propanol = 85/15, flow rate = 1.0 mL/min,  $\lambda$  = 254 nm, *t* (major) = 18.49 min, *t* (minor) = 33.47 min].  $[\alpha]_D^{20} = -30.4^\circ$  ( $c = 1.0$ ,  $\text{CHCl}_3$ ).  **$^1\text{H}$  NMR (500 MHz,  $\text{CDCl}_3$ )**  $\delta$  7.84 (d,  $J = 8.3$  Hz, 2H), 7.55 (d,  $J = 10.2$  Hz, 1H), 7.38 (d,  $J = 8.0$  Hz, 2H), 7.22 (t,  $J = 7.7$  Hz, 1H), 7.09 (t,  $J = 7.6$  Hz, 1H), 7.06 (s, 1H), 6.92 – 6.77 (m, 3H), 6.61 (d,  $J = 8.2$  Hz, 1H), 6.41 (d,  $J = 9.6$  Hz, 1H), 4.80 – 4.54 (m, 4H), 3.73 (s, 3H), 2.47 (s, 3H), 2.13 (s, 3H), 1.90 (s, 3H), 1.71 (s, 3H).  **$^{13}\text{C}$  NMR (126 MHz,  $\text{CDCl}_3$ )**  $\delta$  160.75, 142.74, 140.12, 138.77, 135.37, 134.83, 134.48, 133.64, 132.93, 132.81, 128.93, 128.40, 127.67, 127.47, 127.27, 127.11, 127.06, 126.63, 126.60, 124.76, 124.26, 121.32, 119.81, 110.44, 109.29, 52.96, 52.70, 50.48, 20.54, 20.05, 15.97, 13.09. **HRMS (ESI, *m/z*)** Calcd for  $\text{C}_{34}\text{H}_{32}\text{N}_2\text{O}_4\text{S}$  ( $\text{M}+\text{H}$ )<sup>+</sup>: 565.2156; Found: 565.2142.

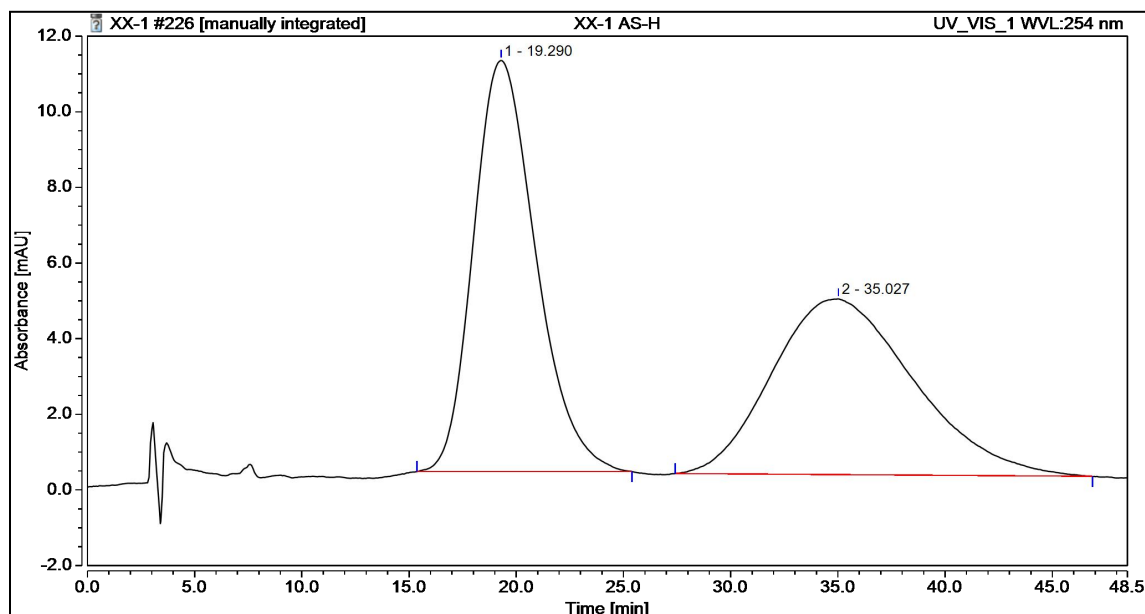

| Integration Results |           |                       |                 |               |                    |                      |                |
|---------------------|-----------|-----------------------|-----------------|---------------|--------------------|----------------------|----------------|
| No.                 | Peak Name | Retention Time<br>min | Area<br>mAU*min | Height<br>mAU | Relative Area<br>% | Relative Height<br>% | Amount<br>n.a. |
| 1                   |           | 19.290                | 36.626          | 10.871        | 50.75              | 70.05                | n.a.           |
| 2                   |           | 35.027                | 35.550          | 4.648         | 49.25              | 29.95                | n.a.           |
| <b>Total:</b>       |           |                       | <b>72.177</b>   | <b>15.519</b> | <b>100.00</b>      | <b>100.00</b>        |                |

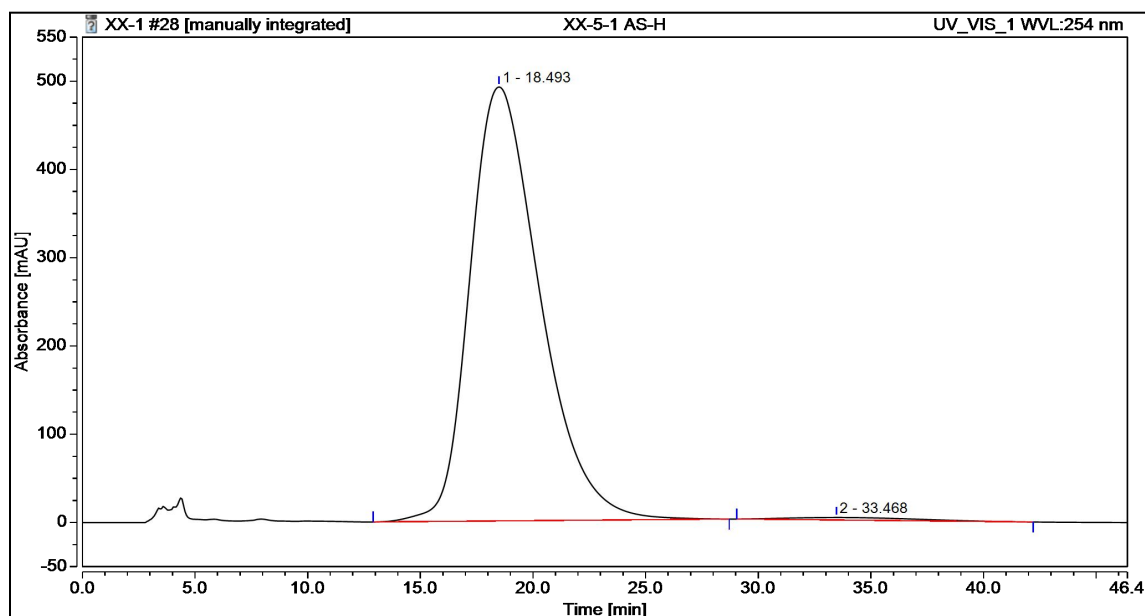

| Integration Results |           |                       |                 |               |                    |                      |                |
|---------------------|-----------|-----------------------|-----------------|---------------|--------------------|----------------------|----------------|
| No.                 | Peak Name | Retention Time<br>min | Area<br>mAU*min | Height<br>mAU | Relative Area<br>% | Relative Height<br>% | Amount<br>n.a. |
| 1                   |           | 18.493                | 1771.926        | 491.788       | 98.90              | 99.42                | n.a.           |
| 2                   |           | 33.468                | 19.652          | 2.891         | 1.10               | 0.58                 | n.a.           |
| Total:              |           |                       | 1791.578        | 494.679       | 100.00             | 100.00               |                |

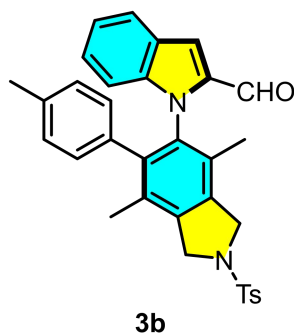

White solid, 27.8 mg, 52% yield, 79% ee. [Chiral HPLC analysis of the product: Daicel Chiralpak OD-H 250X4.6 mm 5u column; *n*-hexane/2-propanol = 80/20, flow rate = 1.0 mL/min,  $\lambda = 254$  nm,  $t$  (major) = 8.62 min,  $t$  (minor) = 11.59 min].  $[\alpha]_D^{20} = -46.8^\circ$  ( $c = 0.8$ ,  $\text{CHCl}_3$ ).  $^1\text{H NMR}$  (500 MHz,  $\text{CDCl}_3$ )  $\delta$  9.59 (s, 1H), 7.84 (d,  $J = 8.3$  Hz, 2H), 7.61 (d,  $J = 8.1$  Hz, 1H), 7.39 (d,  $J = 8.0$  Hz, 2H), 7.29 (s, 1H), 7.11 (d,  $J = 9.1$  Hz, 1H), 7.08 (s, 1H), 6.89 (d,  $J = 8.5$  Hz, 2H), 6.77 (d,  $J = 9.7$  Hz, 1H), 6.62 (d,  $J = 6.5$  Hz, 1H), 6.45 (d,  $J = 7.8$  Hz, 1H), 4.75 (d,  $J = 10.2$  Hz, 2H), 4.64 (d,  $J = 11.4$  Hz, 2H), 2.47 (s, 3H), 2.13 (s, 3H), 1.91 (s, 3H), 1.67 (s, 3H).  $^{13}\text{C NMR}$  (126 MHz,  $\text{CDCl}_3$ )  $\delta$  181.67, 143.83, 141.22, 140.70, 136.52, 136.13, 135.93, 134.94, 134.92, 133.91, 133.75, 130.00, 129.69, 128.86, 128.43, 128.31, 128.10, 127.66, 127.63,



127.08, 125.99, 123.14, 121.26, 116.39, 111.58, 54.00, 53.73, 21.59, 21.06, 17.01,  
 14.04. **HRMS (ESI, m/z)** Calcd for C<sub>33</sub>H<sub>30</sub>N<sub>2</sub>O<sub>3</sub>S (M+H)<sup>+</sup>: 535.2049; Found:  
 535.2059.

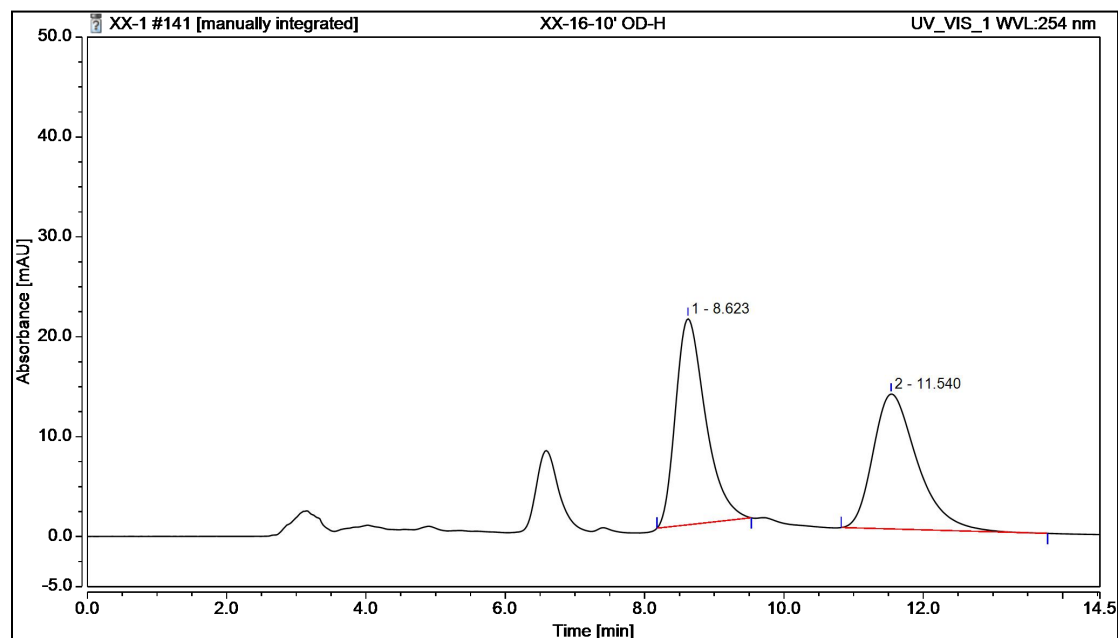

| Integration Results |           |                    |               |               |                 |                   |             |
|---------------------|-----------|--------------------|---------------|---------------|-----------------|-------------------|-------------|
| No.                 | Peak Name | Retention Time min | Area mAU*min  | Height mAU    | Relative Area % | Relative Height % | Amount n.a. |
| 1                   |           | 8.623              | 10.292        | 20.623        | 50.80           | 60.43             | n.a.        |
| 2                   |           | 11.540             | 9.970         | 13.505        | 49.20           | 39.57             | n.a.        |
| <b>Total:</b>       |           |                    | <b>20.262</b> | <b>34.128</b> | <b>100.00</b>   | <b>100.00</b>     |             |

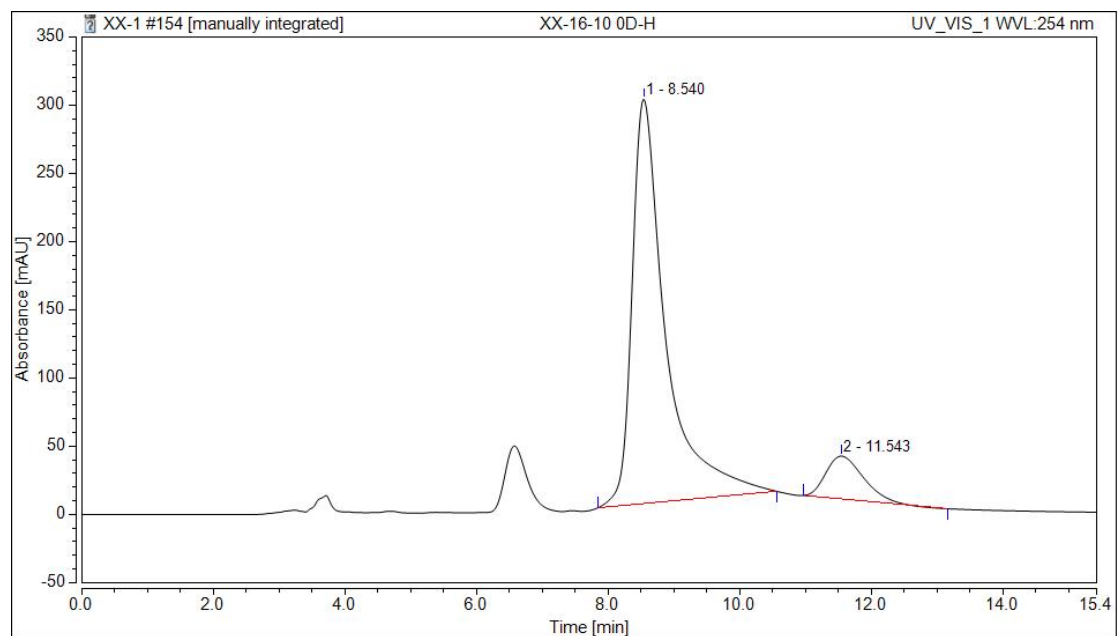

| Integration Results |           |                    |                |                |                 |                   |             |
|---------------------|-----------|--------------------|----------------|----------------|-----------------|-------------------|-------------|
| No.                 | Peak Name | Retention Time min | Area mAU*min   | Height mAU     | Relative Area % | Relative Height % | Amount n.a. |
| 1                   |           | 8.540              | 176.046        | 296.647        | 89.44           | 90.42             | n.a.        |
| 2                   |           | 11.543             | 20.777         | 31.428         | 10.56           | 9.58              | n.a.        |
| <b>Total:</b>       |           |                    | <b>196.823</b> | <b>328.075</b> | <b>100.00</b>   | <b>100.00</b>     |             |

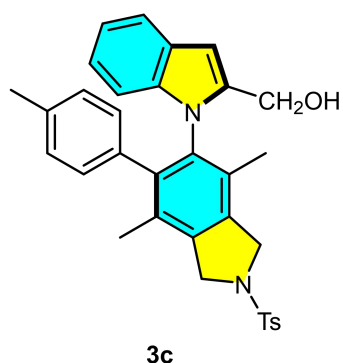

White solid, 14.5 mg, 27% yield, 90% ee. [Chiral HPLC analysis of the product: Daicel Chiralpak OD-H 250X4.6 mm 5u column; *n*-hexane/2-propanol = 80/20, flow rate = 1.0 mL/min,  $\lambda = 254$  nm,  $t$  (major) = 8.74 min,  $t$  (minor) = 11.50 min].  $[\alpha]_D^{20} = -110.3^\circ$  ( $c = 1.8$ ,  $\text{CHCl}_3$ ).  **$^1\text{H NMR}$  (500 MHz,  $\text{CDCl}_3$ )**  $\delta$  7.84 (d,  $J = 8.3$  Hz, 2H), 7.49 (d,  $J = 7.6$  Hz, 1H), 7.38 (d,  $J = 8.0$  Hz, 2H), 7.14 – 7.10 (m, 1H), 7.08 – 7.04 (m, 1H), 7.01 – 6.93 (m, 2H), 6.84 (d,  $J = 8.2$  Hz, 1H), 6.62 (d,  $J = 6.0$  Hz, 1H), 6.46 (d,  $J = 5.9$  Hz, 1H), 6.33 (s, 1H), 4.72 – 4.63 (m, 4H), 4.26 (s, 2H), 2.45 (s, 3H), 2.14 (s, 3H), 1.96 (s, 3H), 1.65 (s, 3H).  **$^{13}\text{C NMR}$  (126 MHz,  $\text{CDCl}_3$ )**  $\delta$  143.84, 141.77, 139.13, 138.81, 136.86, 136.26, 135.21, 134.43, 133.65, 130.12, 130.01, 129.73, 128.77, 128.69, 128.26, 127.98, 127.69, 127.36, 122.21, 120.66, 119.84, 110.47, 101.68, 57.38, 54.01, 53.72, 21.61, 21.10, 17.27, 14.14. **HRMS (ESI,  $m/z$ )** Calcd for  $\text{C}_{33}\text{H}_{32}\text{N}_2\text{O}_3\text{S}$  ( $\text{M}+\text{H}$ ) $^+$ : 536.2134; Found: 536.2134.

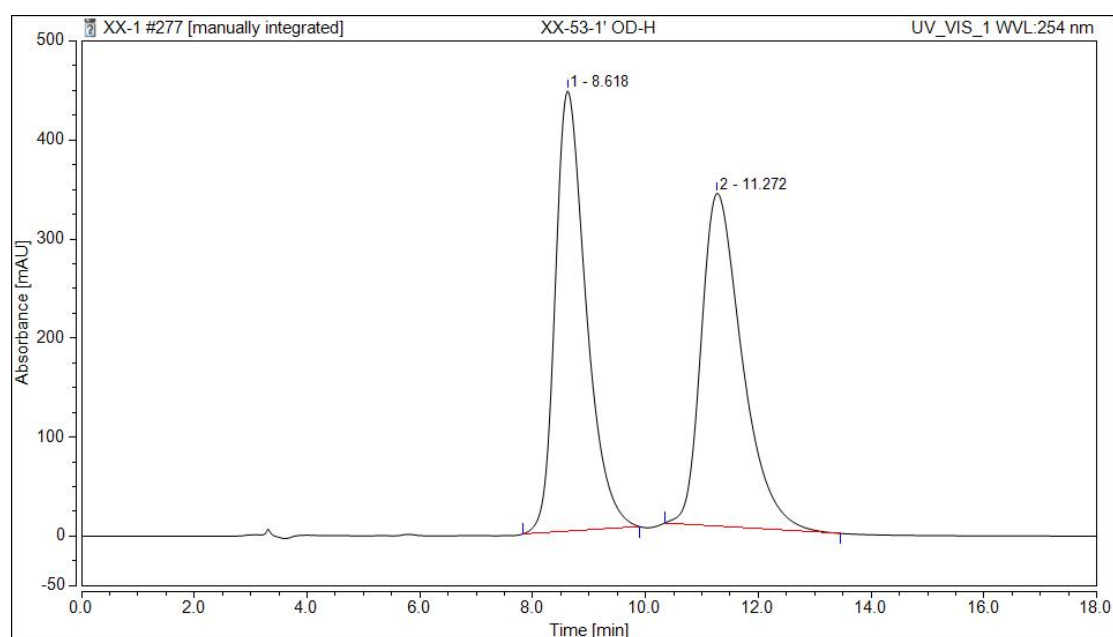

| Integration Results |           |                       |                 |                |                    |                      |                |
|---------------------|-----------|-----------------------|-----------------|----------------|--------------------|----------------------|----------------|
| No.                 | Peak Name | Retention Time<br>min | Area<br>mAU*min | Height<br>mAU  | Relative Area<br>% | Relative Height<br>% | Amount<br>n.a. |
| 1                   |           | 8.618                 | 281.516         | 444.645        | 49.97              | 56.95                | n.a.           |
| 2                   |           | 11.272                | 281.908         | 336.180        | 50.03              | 43.05                | n.a.           |
| <b>Total:</b>       |           |                       | <b>563.424</b>  | <b>780.825</b> | <b>100.00</b>      | <b>100.00</b>        |                |

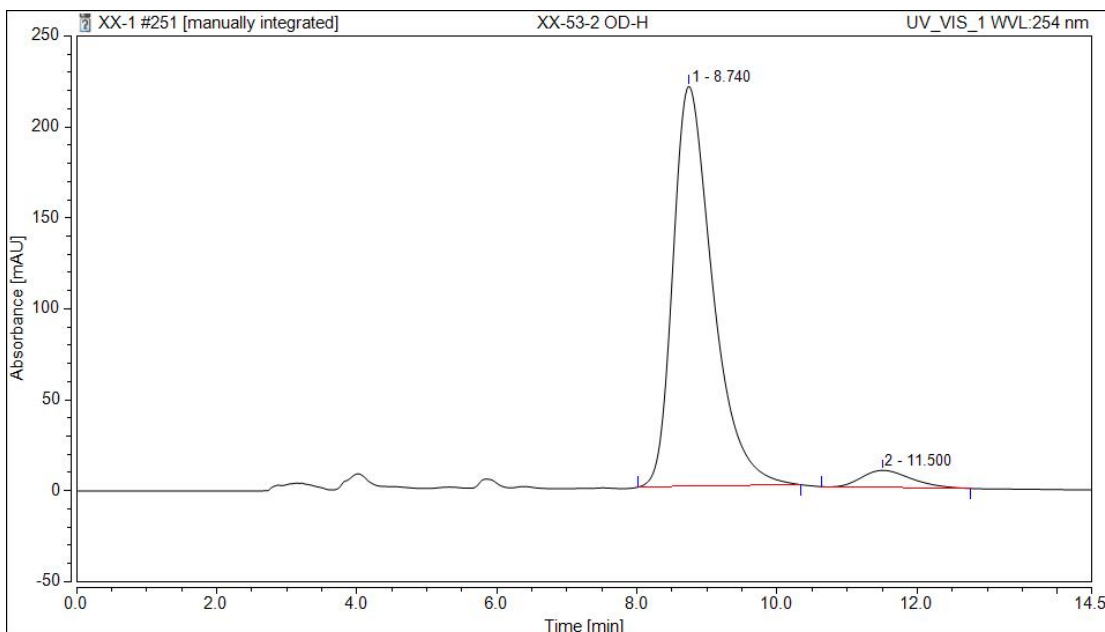

| Integration Results |           |                       |                 |                |                    |                      |                |
|---------------------|-----------|-----------------------|-----------------|----------------|--------------------|----------------------|----------------|
| No.                 | Peak Name | Retention Time<br>min | Area<br>mAU*min | Height<br>mAU  | Relative Area<br>% | Relative Height<br>% | Amount<br>n.a. |
| 1                   |           | 8.740                 | 144.048         | 219.966        | 94.94              | 95.91                | n.a.           |
| 2                   |           | 11.500                | 7.681           | 9.388          | 5.06               | 4.09                 | n.a.           |
| <b>Total:</b>       |           |                       | <b>151.729</b>  | <b>229.354</b> | <b>100.00</b>      | <b>100.00</b>        |                |

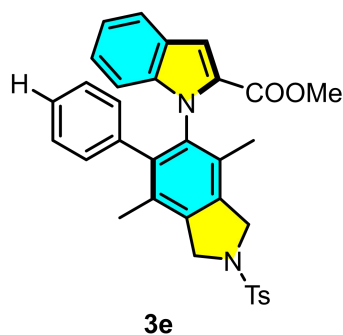

White solid, 53.3 mg, 97% yield, 99% ee. [Chiral HPLC analysis of the product: Daicel Chiralpak AS-H 250X4.6 mm 5u column; *n*-hexane/2-propanol = 80/20, flow rate = 1.0 mL/min,  $\lambda$  = 254 nm,  $t$  (major) = 16.30 min,  $t$  (minor) = 24.80 min].  $[\alpha]_D^{20} = -25.2^\circ$  ( $c = 1.8$ ,  $\text{CHCl}_3$ ).  $^1\text{H NMR}$  (500 MHz,  $\text{CDCl}_3$ )  $\delta$  7.85 (d,  $J = 8.3$  Hz, 2H), 7.53 (d,  $J = 8.1$  Hz, 1H), 7.38 (d,  $J = 8.1$  Hz, 2H), 7.24 – 7.19 (m, 1H), 7.09 (q,  $J = 8.0$  Hz, 2H), 7.04 (s, 1H), 7.00 (t,  $J = 7.5$  Hz, 1H), 6.92 (d,  $J = 7.6$  Hz, 1H), 6.86 (d,  $J = 7.3$  Hz, 1H), 6.78 (t,  $J = 7.6$  Hz, 1H), 6.51 (d,  $J = 7.8$  Hz, 1H), 4.79 – 4.63 (m, 4H), 3.72

(s, 3H), 2.46 (s, 3H), 1.91 (s, 3H), 1.75 (s, 3H). <sup>13</sup>C NMR (126 MHz, CDCl<sub>3</sub>) δ 161.79, 143.79, 141.08, 139.82, 136.88, 135.83, 135.61, 134.90, 134.04, 129.97, 129.25, 128.91, 128.60, 128.35, 127.81, 127.67, 127.36, 127.22, 126.96, 125.81, 125.35, 122.39, 120.91, 111.45, 110.36, 53.99, 53.74, 51.51, 21.56, 16.96, 14.15.

HRMS (ESI, m/z) Calcd for C<sub>33</sub>H<sub>30</sub>N<sub>2</sub>O<sub>4</sub>S (M+H)<sup>+</sup>: 551.1999; Found: 551.2007.

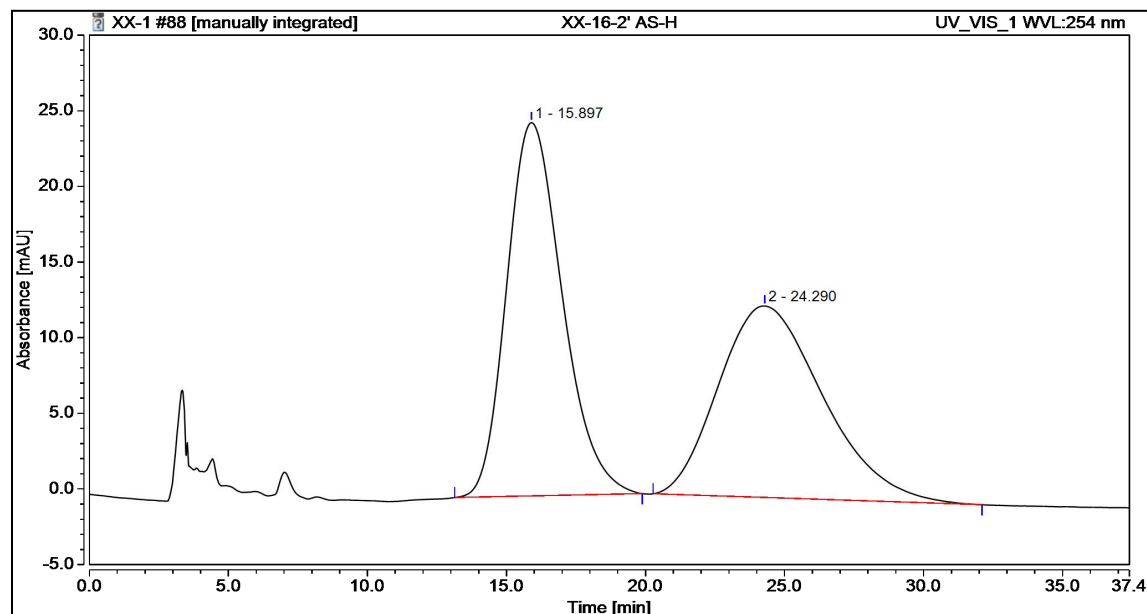

| Integration Results |           |                    |                |               |                 |                   |        |
|---------------------|-----------|--------------------|----------------|---------------|-----------------|-------------------|--------|
| No.                 | Peak Name | Retention Time min | Area mAU*min   | Height mAU    | Relative Area % | Relative Height % | Amount |
| 1                   |           | 15.897             | 57.206         | 24.683        | 50.94           | 66.09             | n.a.   |
| 2                   |           | 24.290             | 55.104         | 12.664        | 49.06           | 33.91             | n.a.   |
| <b>Total:</b>       |           |                    | <b>112.310</b> | <b>37.347</b> | <b>100.00</b>   | <b>100.00</b>     |        |

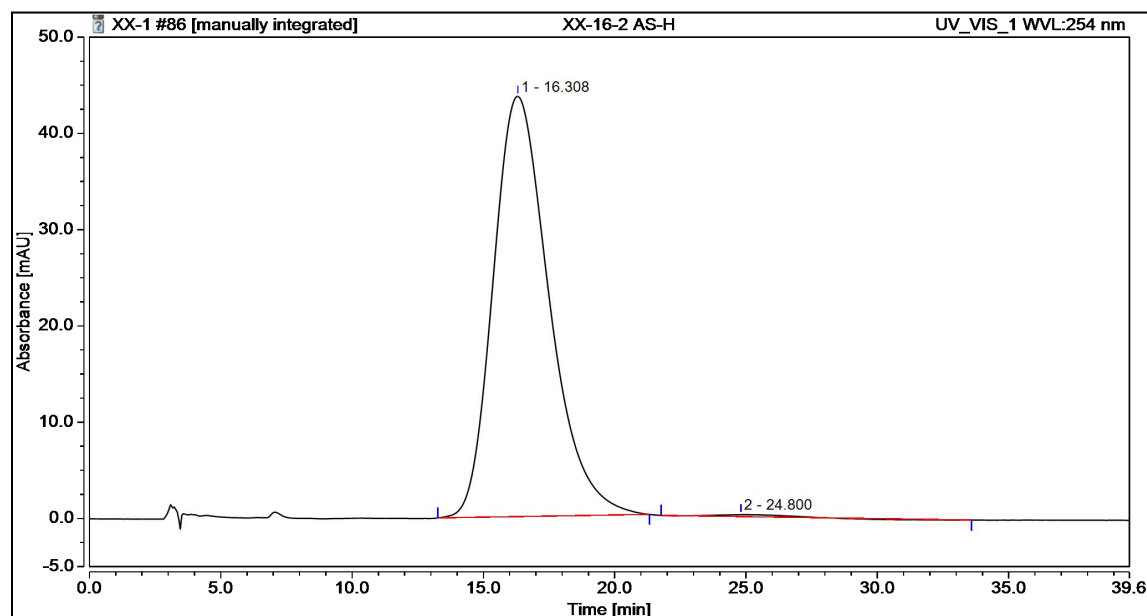

| Integration Results |           |                       |                 |               |                    |                      |                |
|---------------------|-----------|-----------------------|-----------------|---------------|--------------------|----------------------|----------------|
| No.                 | Peak Name | Retention Time<br>min | Area<br>mAU*min | Height<br>mAU | Relative Area<br>% | Relative Height<br>% | Amount<br>n.a. |
| 1                   |           | 16.308                | 107.830         | 43.670        | 99.66              | 99.53                | n.a.           |
| 2                   |           | 24.800                | 0.371           | 0.207         | 0.34               | 0.47                 | n.a.           |
| <b>Total:</b>       |           |                       | <b>108.201</b>  | <b>43.877</b> | <b>100.00</b>      | <b>100.00</b>        |                |

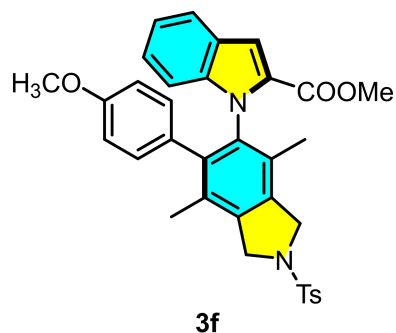

White solid, 48.1 mg, 83% yield, 98% ee. [Chiral HPLC analysis of the product: Daicel Chiralpak AS-H 250X4.6 mm 5u column; *n*-hexane/2-propanol = 80/20, flow rate = 1.0 mL/min,  $\lambda = 254$  nm,  $t$  (major) = 24.80 min,  $t$  (minor) = 39.40 min].  $[\alpha]_D^{20} = -54.6^\circ$  ( $c = 0.7$ ,  $\text{CHCl}_3$ ).  **$^1\text{H NMR}$  (500 MHz,  $\text{CDCl}_3$ )**  $\delta$  7.84 (d,  $J = 8.3$  Hz, 2H), 7.55 (d,  $J = 8.0$  Hz, 1H), 7.38 (d,  $J = 8.0$  Hz, 2H), 7.22 (t,  $J = 7.1$  Hz, 1H), 7.12 – 7.06 (m, 2H), 6.84 (t,  $J = 8.7$  Hz, 2H), 6.64 (dd,  $J = 8.5, 2.7$  Hz, 1H), 6.43 (dd,  $J = 8.4, 2.2$  Hz, 1H), 6.33 (dd,  $J = 8.5, 2.7$  Hz, 1H), 4.79 – 4.61 (m, 4H), 3.72 (s, 3H), 3.63 (s, 3H), 2.47 (s, 3H), 1.91 (s, 3H), 1.72 (s, 3H).  **$^{13}\text{C NMR}$  (126 MHz,  $\text{CDCl}_3$ )**  $\delta$  161.79, 143.81, 140.06, 139.74, 135.97, 135.70, 135.18, 134.01, 130.61, 130.55, 129.97, 129.49, 129.43, 129.38, 128.72, 128.19, 127.66, 125.83, 125.50, 122.52, 121.04, 114.57, 114.44, 114.40, 114.27, 111.27, 110.64, 53.94, 53.71, 51.54, 21.55, 16.93, 14.11. **HRMS (ESI,  $m/z$ )** Calcd for  $\text{C}_{34}\text{H}_{32}\text{N}_2\text{O}_5\text{S}$  ( $\text{M}+\text{H}$ ) $^+$ : 581.2104; Found: 581.2106.

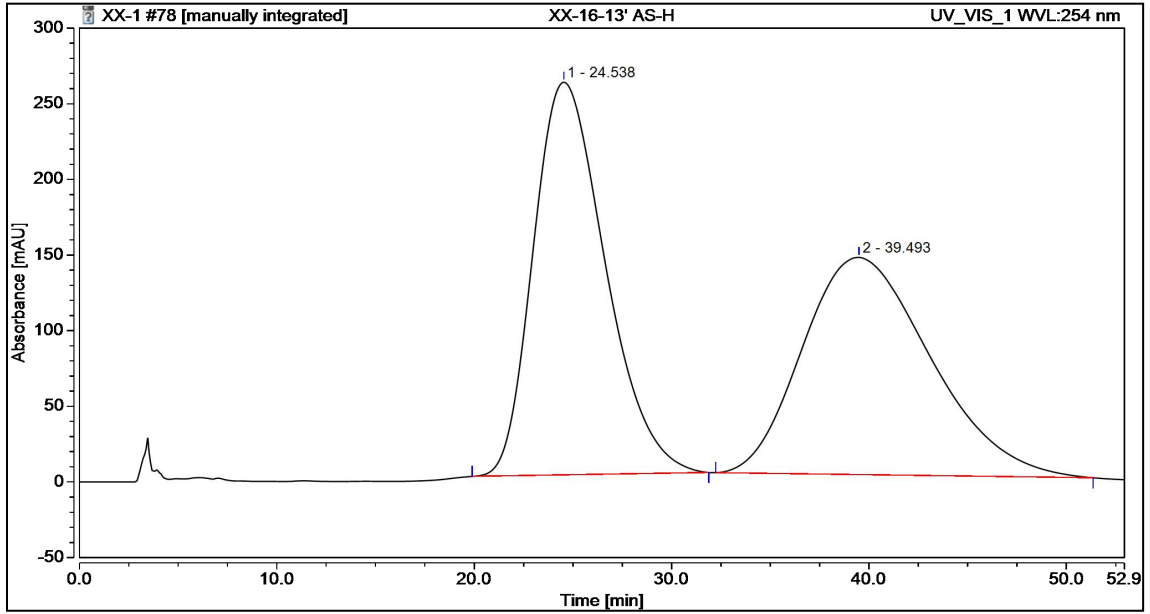

| Integration Results |           |                       |                 |                |                    |                      |                |
|---------------------|-----------|-----------------------|-----------------|----------------|--------------------|----------------------|----------------|
| No.                 | Peak Name | Retention Time<br>min | Area<br>mAU*min | Height<br>mAU  | Relative Area<br>% | Relative Height<br>% | Amount<br>n.a. |
| 1                   |           | 24.538                | 1096.132        | 259.572        | 50.41              | 64.39                | n.a.           |
| 2                   |           | 39.493                | 1078.125        | 143.583        | 49.59              | 35.61                | n.a.           |
| <b>Total:</b>       |           |                       | <b>2174.258</b> | <b>403.155</b> | <b>100.00</b>      | <b>100.00</b>        |                |

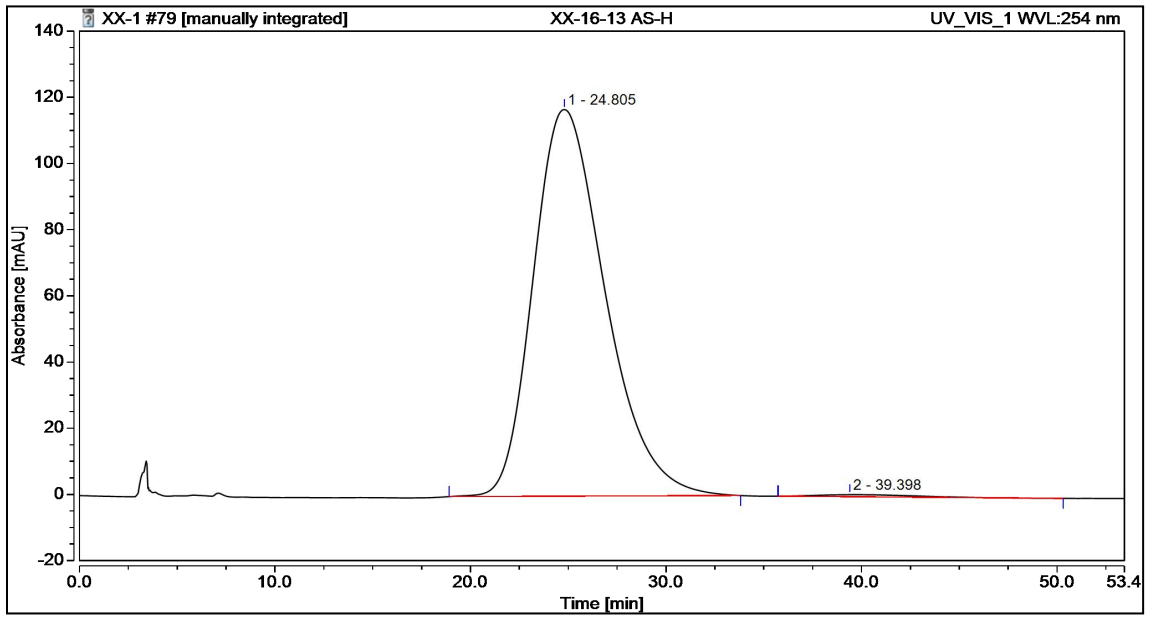

| Integration Results |           |                       |                 |                |                    |                      |                |
|---------------------|-----------|-----------------------|-----------------|----------------|--------------------|----------------------|----------------|
| No.                 | Peak Name | Retention Time<br>min | Area<br>mAU*min | Height<br>mAU  | Relative Area<br>% | Relative Height<br>% | Amount<br>n.a. |
| 1                   |           | 24.805                | 498.457         | 116.844        | 99.26              | 99.47                | n.a.           |
| 2                   |           | 39.398                | 3.704           | 0.623          | 0.74               | 0.53                 | n.a.           |
| <b>Total:</b>       |           |                       | <b>502.161</b>  | <b>117.468</b> | <b>100.00</b>      | <b>100.00</b>        |                |

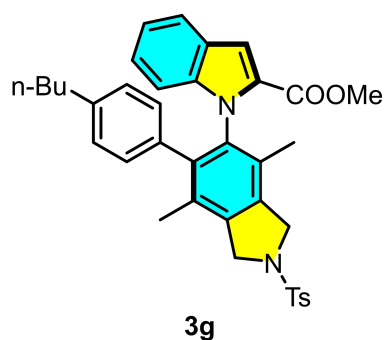

White solid, 51.5 mg, 85% yield, 99% ee. [Chiral HPLC analysis of the product: Daicel Chiralpak AS-H 250X4.6 mm 5u column; *n*-hexane/2-propanol = 85/15, flow rate = 1.0 mL/min,  $\lambda$  = 254 nm, *t* (major) = 14.28 min, *t* (minor) = 26.96 min].  $[\alpha]_D^{20}$  = - 48.0°(c = 1.5, CHCl<sub>3</sub>). **<sup>1</sup>H NMR (500 MHz, CDCl<sub>3</sub>)**  $\delta$  7.85 (d, *J* = 8.3 Hz, 2H), 7.52 (d, *J* = 8.0 Hz, 1H), 7.38 (d, *J* = 8.0 Hz, 2H), 7.21 (t, *J* = 7.1 Hz, 1H), 7.08 (t, *J* = 7.5 Hz, 1H), 7.02 (s, 1H), 6.89 (d, *J* = 9.8 Hz, 1H), 6.85 (d, *J* = 8.3 Hz, 1H), 6.79 (d, *J* = 7.8 Hz, 1H), 6.57 (d, *J* = 9.7 Hz, 1H), 6.37 (d, *J* = 9.7 Hz, 1H), 4.80 – 4.61 (m, 4H), 3.72 (s, 3H), 2.46 (s, 3H), 2.39 (t, *J* = 7.6 Hz, 2H), 1.92 (s, 3H), 1.75 (s, 3H), 1.41 (dd, *J* = 8.1, 5.7 Hz, 2H), 1.16 (q, *J* = 7.5 Hz, 2H), 0.84 (t, *J* = 7.4 Hz, 3H). **<sup>13</sup>C NMR (126 MHz, CDCl<sub>3</sub>)**  $\delta$  161.80, 143.79, 141.35, 141.16, 139.83, 135.98, 135.48, 134.64, 133.94, 129.98, 129.36, 128.70, 128.49, 128.42, 127.67, 127.59, 127.38, 127.36, 125.84, 125.24, 122.30, 120.81, 111.52, 110.31, 54.01, 53.76, 51.49, 35.07, 33.19, 21.97, 21.59, 17.05, 14.21, 13.93. **HRMS (ESI, m/z)** Calcd for C<sub>37</sub>H<sub>38</sub>N<sub>2</sub>O<sub>4</sub>S (M+H)<sup>+</sup>: 607.2625; Found: 607.2633.

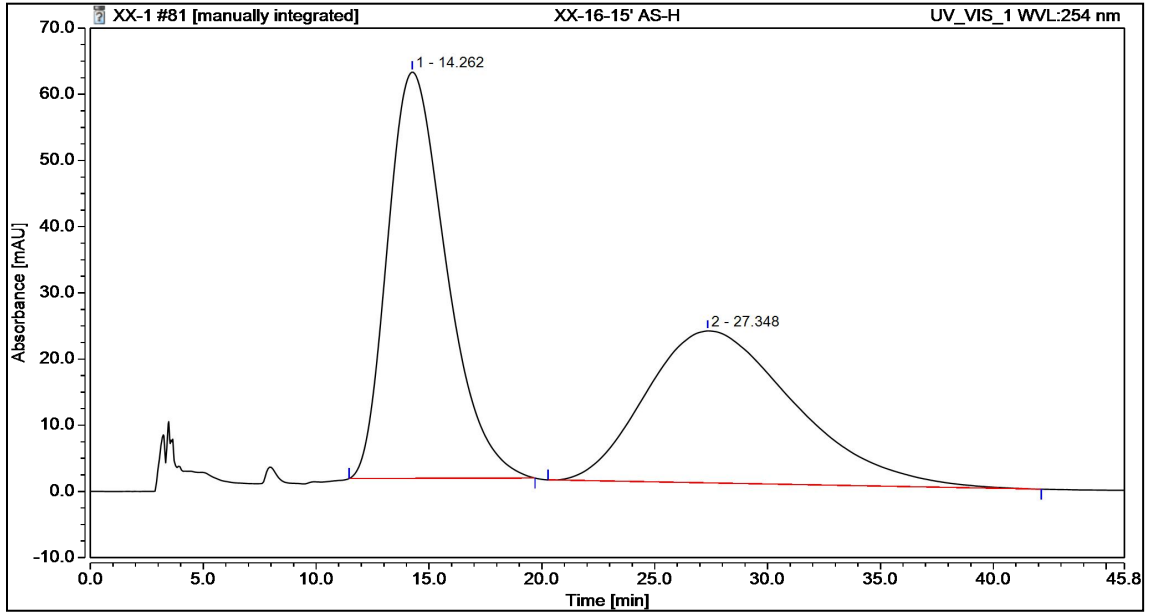

| Integration Results |           |                       |                 |               |                    |                      |                |
|---------------------|-----------|-----------------------|-----------------|---------------|--------------------|----------------------|----------------|
| No.                 | Peak Name | Retention Time<br>min | Area<br>mAU*min | Height<br>mAU | Relative Area<br>% | Relative Height<br>% | Amount<br>n.a. |
| 1                   |           | 14.262                | 185.193         | 61.402        | 51.30              | 72.77                | n.a.           |
| 2                   |           | 27.348                | 175.827         | 22.971        | 48.70              | 27.23                | n.a.           |
| <b>Total:</b>       |           |                       | <b>361.020</b>  | <b>84.374</b> | <b>100.00</b>      | <b>100.00</b>        |                |

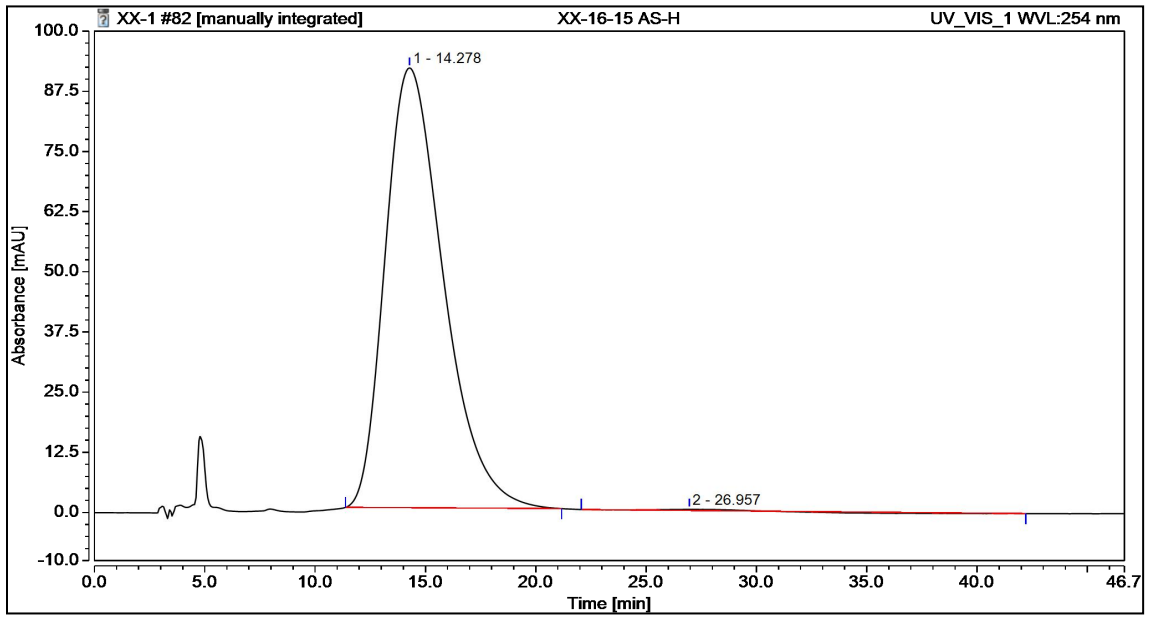

| Integration Results |           |                       |                 |               |                    |                      |                |
|---------------------|-----------|-----------------------|-----------------|---------------|--------------------|----------------------|----------------|
| No.                 | Peak Name | Retention Time<br>min | Area<br>mAU*min | Height<br>mAU | Relative Area<br>% | Relative Height<br>% | Amount<br>n.a. |
| 1                   |           | 14.278                | 279.949         | 91.380        | 99.85              | 99.73                | n.a.           |
| 2                   |           | 26.957                | 0.418           | 0.247         | 0.15               | 0.27                 | n.a.           |
| <b>Total:</b>       |           |                       | <b>280.366</b>  | <b>91.627</b> | <b>100.00</b>      | <b>100.00</b>        |                |



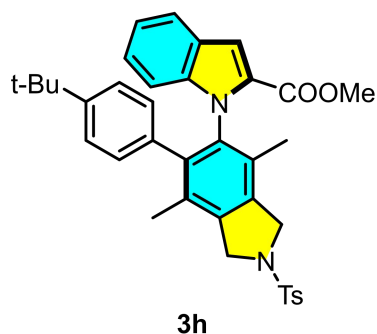

White solid, 52.1 mg, 86% yield, 99% ee. [Chiral HPLC analysis of the product: Daicel Chiralpak AS-H 250X4.6 mm 5u column; *n*-hexane/2-propanol = 95/5, flow rate = 1.0 mL/min,  $\lambda$  = 254 nm, *t* (major) = 42.90 min, *t* (minor) = 87.69 min].  $[\alpha]_D^{20} = -50.5^\circ$  (*c* = 1.9, CHCl<sub>3</sub>). **<sup>1</sup>H NMR (500 MHz, CDCl<sub>3</sub>)**  $\delta$  7.85 (s, 2H), 7.52 (d, *J* = 8.0 Hz, 1H), 7.38 (d, *J* = 7.9 Hz, 2H), 7.21 (t, *J* = 7.7 Hz, 1H), 7.12 – 6.97 (m, 3H), 6.89 – 6.74 (m, 3H), 6.39 (s, 1H), 4.70 (dd, *J* = 57.3, 11.9 Hz, 4H), 3.71 (s, 3H), 2.46 (s, 3H), 1.93 (s, 3H), 1.74 (s, 3H), 1.13 (s, 9H). **<sup>13</sup>C NMR (126 MHz, CDCl<sub>3</sub>)**  $\delta$  161.79, 149.62, 143.77, 141.13, 139.90, 136.07, 135.49, 133.72, 129.99, 128.61, 127.68, 125.91, 125.23, 124.11, 122.29, 120.81, 111.56, 110.34, 54.04, 53.78, 51.46, 34.28, 31.17, 21.58, 17.11, 14.21. **HRMS (ESI, *m/z*)** Calcd for C<sub>37</sub>H<sub>38</sub>N<sub>2</sub>O<sub>4</sub>S (M+H)<sup>+</sup>: 607.2625; Found: 607.2619.

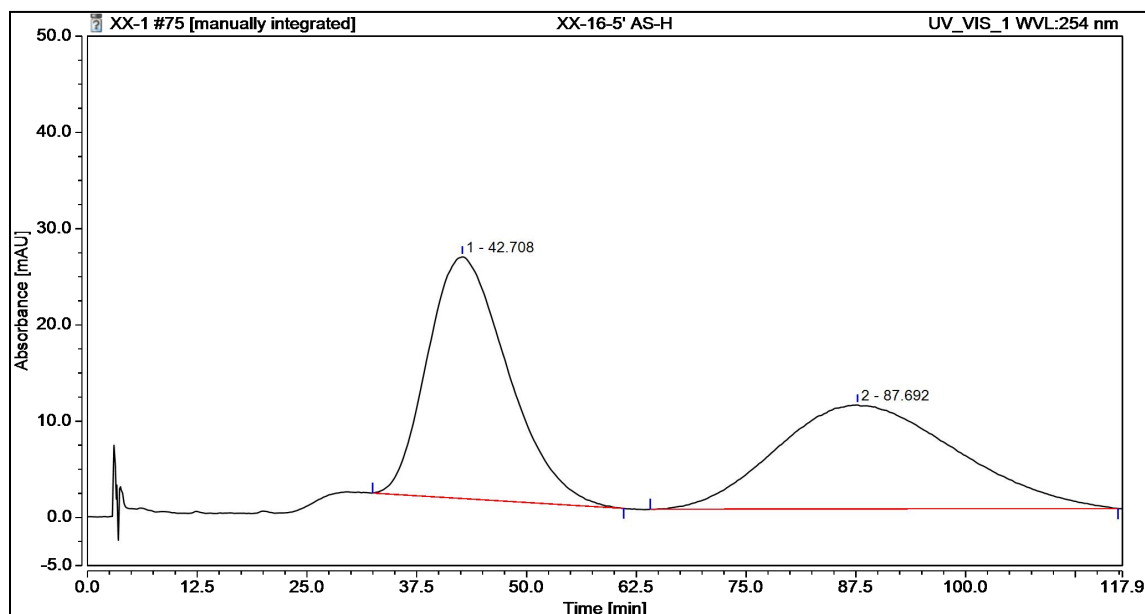

| Integration Results |           |                       |                 |               |                    |                      |                |
|---------------------|-----------|-----------------------|-----------------|---------------|--------------------|----------------------|----------------|
| No.                 | Peak Name | Retention Time<br>min | Area<br>mAU*min | Height<br>mAU | Relative Area<br>% | Relative Height<br>% | Amount<br>n.a. |
| 1                   |           | 42.708                | 266.887         | 25.114        | 50.96              | 69.92                | n.a.           |
| 2                   |           | 87.692                | 256.849         | 10.806        | 49.04              | 30.08                | n.a.           |
| <b>Total:</b>       |           |                       | <b>523.736</b>  | <b>35.920</b> | <b>100.00</b>      | <b>100.00</b>        |                |

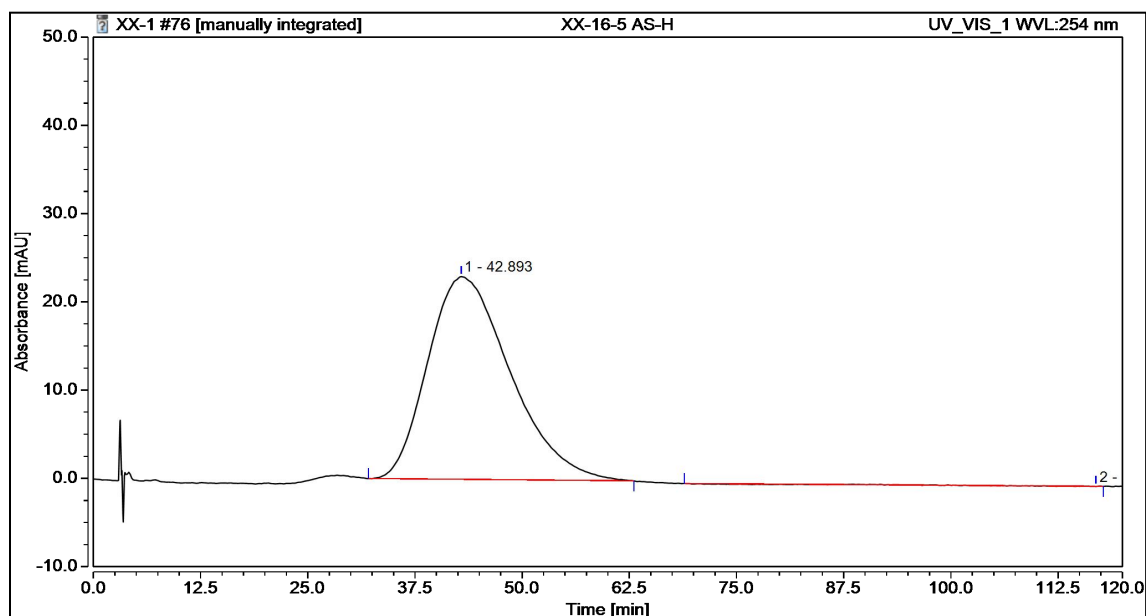

| Integration Results |           |                       |                 |               |                    |                      |                |
|---------------------|-----------|-----------------------|-----------------|---------------|--------------------|----------------------|----------------|
| No.                 | Peak Name | Retention Time<br>min | Area<br>mAU*min | Height<br>mAU | Relative Area<br>% | Relative Height<br>% | Amount<br>n.a. |
| 1                   |           | 42.893                | 255.935         | 22.988        | 99.91              | 99.92                | n.a.           |
| 2                   |           | 116.897               | 0.225           | 0.019         | 0.09               | 0.08                 | n.a.           |
| Total:              |           |                       | 256.160         | 23.008        | 100.00             | 100.00               |                |

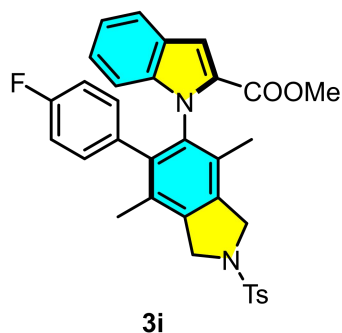

White solid, 47.1 mg, 83% yield, 98% ee. [Chiral HPLC analysis of the product: Daicel Chiralpak AS-H 250X4.6 mm 5u column; *n*-hexane/2-propanol = 85/15, flow rate = 1.0 mL/min,  $\lambda = 254$  nm,  $t$  (major) = 26.95 min,  $t$  (minor) = 52.92 min].  $[\alpha]_D^{20} = -17.4^\circ$  ( $c = 1.9$ ,  $\text{CHCl}_3$ ).  $^1\text{H NMR}$  (500 MHz,  $\text{CDCl}_3$ )  $\delta$  7.84 (d,  $J = 8.2$  Hz, 2H), 7.55 (d,  $J = 8.0$  Hz, 1H), 7.38 (d,  $J = 8.0$  Hz, 2H), 7.22 (t,  $J = 8.3$  Hz, 1H), 7.14 – 7.04 (m, 2H), 6.94 – 6.75 (m, 3H), 6.49 (d,  $J = 6.9$  Hz, 2H), 4.70 (dd,  $J = 56.0, 13.2$  Hz, 4H), 3.73 (s, 3H), 2.47 (s, 3H), 1.90 (s, 3H), 1.73 (s, 3H).  $^{13}\text{C NMR}$  (126 MHz,  $\text{CDCl}_3$ )  $\delta$  161.79, 143.81, 140.06, 139.74, 135.70, 135.18, 134.01, 130.61, 129.97, 129.49, 129.43, 129.38, 128.72, 128.19, 127.66, 125.83, 125.50, 122.52, 121.04, 114.57, 114.44, 114.40, 114.27, 111.27, 110.64, 53.94, 53.71, 51.54, 21.55, 16.93, 14.11.

HRMS (ESI, m/z) Calcd for C<sub>33</sub>H<sub>29</sub>FN<sub>2</sub>O<sub>4</sub>S (M+H)<sup>+</sup>: 569.1904; Found: 569.1909.

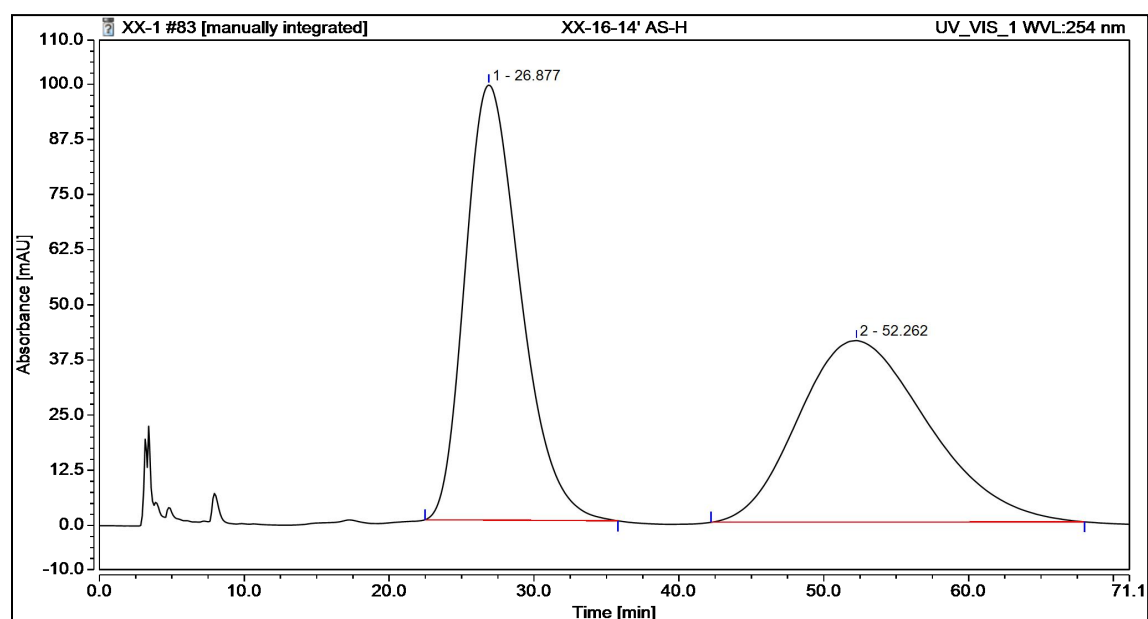

| Integration Results |           |                       |                 |                |                    |                      |                |
|---------------------|-----------|-----------------------|-----------------|----------------|--------------------|----------------------|----------------|
| No.                 | Peak Name | Retention Time<br>min | Area<br>mAU*min | Height<br>mAU  | Relative Area<br>% | Relative Height<br>% | Amount<br>n.a. |
| 1                   |           | 26.877                | 437.120         | 98.595         | 50.60              | 70.55                | n.a.           |
| 2                   |           | 52.262                | 426.674         | 41.153         | 49.40              | 29.45                | n.a.           |
| <b>Total:</b>       |           |                       | <b>863.794</b>  | <b>139.748</b> | <b>100.00</b>      | <b>100.00</b>        |                |

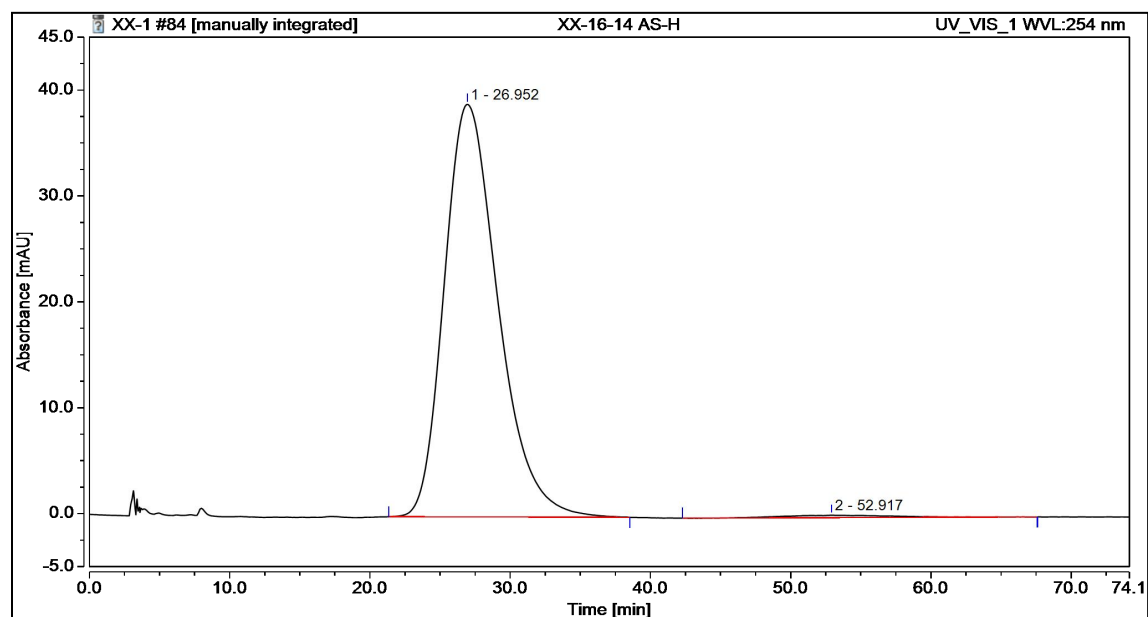

| Integration Results |           |                       |                 |               |                    |                      |                |
|---------------------|-----------|-----------------------|-----------------|---------------|--------------------|----------------------|----------------|
| No.                 | Peak Name | Retention Time<br>min | Area<br>mAU*min | Height<br>mAU | Relative Area<br>% | Relative Height<br>% | Amount<br>n.a. |
| 1                   |           | 26.952                | 173.190         | 38.974        | 98.81              | 99.39                | n.a.           |
| 2                   |           | 52.917                | 2.088           | 0.240         | 1.19               | 0.61                 | n.a.           |
| <b>Total:</b>       |           |                       | <b>175.279</b>  | <b>39.214</b> | <b>100.00</b>      | <b>100.00</b>        |                |

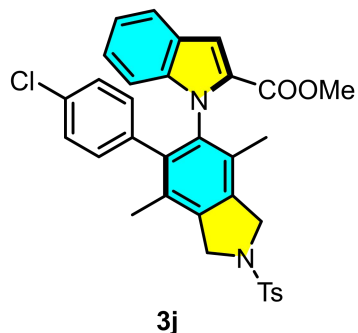

White solid, 38.0 mg, 65% yield, 98% ee. [Chiral HPLC analysis of the product: Daicel Chiralpak AS-H 250X4.6 mm 5u column; *n*-hexane/2-propanol = 70/30, flow rate = 1.0 mL/min,  $\lambda = 254$  nm,  $t$  (major) = 14.19 min,  $t$  (minor) = 31.00 min].  $[\alpha]_D^{20} = -49.5^\circ$  ( $c = 1.3$ ,  $\text{CHCl}_3$ ).  $^1\text{H NMR}$  (500 MHz,  $\text{CDCl}_3$ )  $\delta$  7.84 (d,  $J = 6.3$  Hz, 2H), 7.57 (d,  $J = 8.0$  Hz, 1H), 7.39 (d,  $J = 7.9$  Hz, 2H), 7.25 – 7.20 (m, 1H), 7.14 – 7.06 (m, 3H), 6.91 – 6.76 (m, 3H), 6.48 (d,  $J = 10.4$  Hz, 1H), 4.81 – 4.58 (m, 4H), 3.73 (s, 3H), 2.43 (s, 3H), 1.89 (s, 3H), 1.71 (s, 3H).  $^{13}\text{C NMR}$  (126 MHz,  $\text{CDCl}_3$ )  $\delta$  161.79, 143.82, 139.89, 139.73, 135.76, 135.41, 135.32, 132.97, 130.35, 129.97, 129.22, 129.20, 128.79, 127.74, 127.66, 125.83, 125.55, 122.59, 121.08, 111.23, 110.78, 53.93, 53.70, 51.57, 21.56, 16.93, 14.06. **HRMS (ESI,  $m/z$ )** Calcd for  $\text{C}_{33}\text{H}_{29}\text{ClN}_2\text{O}_4\text{S}$  ( $\text{M}+\text{H}$ ) $^+$ : 585.1609; Found: 585.1636.

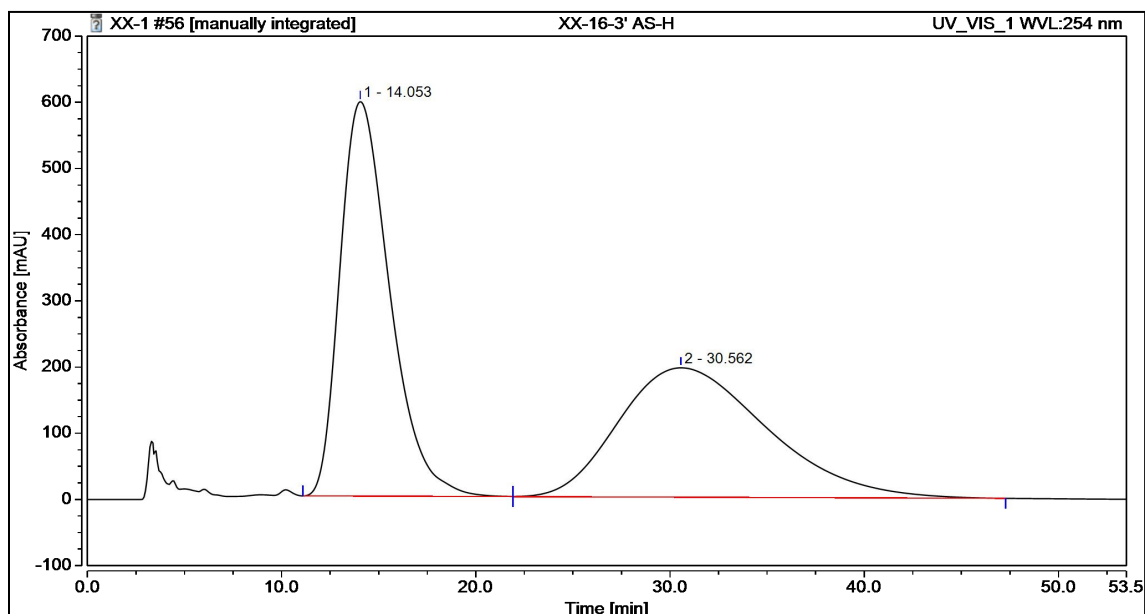

| Integration Results |           |                       |                 |                |                    |                      |                |
|---------------------|-----------|-----------------------|-----------------|----------------|--------------------|----------------------|----------------|
| No.                 | Peak Name | Retention Time<br>min | Area<br>mAU*min | Height<br>mAU  | Relative Area<br>% | Relative Height<br>% | Amount<br>n.a. |
| 1                   |           | 14.053                | 1771.309        | 596.083        | 50.55              | 75.30                | n.a.           |
| 2                   |           | 30.562                | 1732.938        | 195.539        | 49.45              | 24.70                | n.a.           |
| <b>Total:</b>       |           |                       | <b>3504.247</b> | <b>791.622</b> | <b>100.00</b>      | <b>100.00</b>        |                |

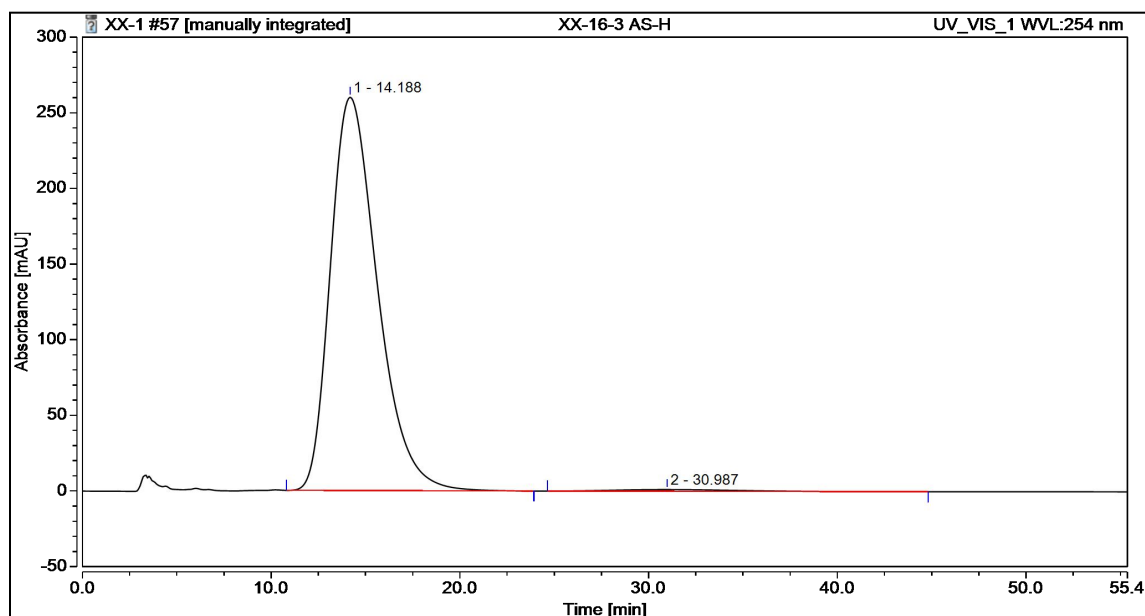

| Integration Results |           |                       |                 |               |                    |                      |                |
|---------------------|-----------|-----------------------|-----------------|---------------|--------------------|----------------------|----------------|
| No.                 | Peak Name | Retention Time<br>min | Area<br>mAU*min | Height<br>mAU | Relative Area<br>% | Relative Height<br>% | Amount<br>n.a. |
| 1                   |           | 14.188                | 749.897         | 259.956       | 98.90              | 99.58                | n.a.           |
| 2                   |           | 30.987                | 8.342           | 1.107         | 1.10               | 0.42                 | n.a.           |
| Total:              |           |                       | 758.239         | 261.063       | 100.00             | 100.00               |                |

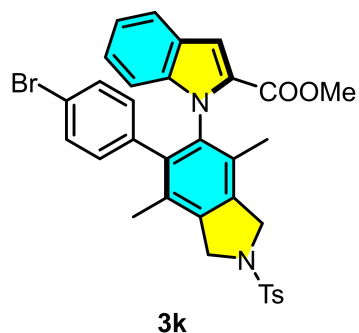

White solid, 35.8 mg, 57% yield, 98% ee. [Chiral HPLC analysis of the product: Daicel Chiralpak AS-H 250X4.6 mm 5u column; *n*-hexane/2-propanol = 70/30, flow rate = 1.0 mL/min,  $\lambda$  = 254 nm,  $t$  (major) = 15.03 min,  $t$  (minor) = 34.52 min].  $[\alpha]_D^{20} = -64.2^\circ$  ( $c = 0.9$ ,  $\text{CHCl}_3$ ).  $^1\text{H NMR}$  (500 MHz,  $\text{CDCl}_3$ )  $\delta$  7.84 (d,  $J = 8.3$  Hz, 2H), 7.57 (d,  $J = 8.0$  Hz, 1H), 7.39 (d,  $J = 7.9$  Hz, 2H), 7.23 (t,  $J = 8.0$  Hz, 2H), 7.13 – 7.08 (m, 2H), 6.94 (dd,  $J = 8.3, 2.2$  Hz, 1H), 6.83 (d,  $J = 8.2$  Hz, 2H), 6.43 (dd,  $J = 8.2, 2.2$  Hz, 1H), 4.75 (d,  $J = 12.5$  Hz, 2H), 4.62 (d,  $J = 12.6$  Hz, 2H), 3.73 (s, 3H), 2.47 (s, 3H), 1.89 (s, 3H), 1.70 (s, 3H).  $^{13}\text{C NMR}$  (126 MHz,  $\text{CDCl}_3$ )  $\delta$  161.78, 143.82, 139.89, 139.74, 135.91, 135.78, 135.69, 135.35, 130.69, 130.59, 129.97, 129.53, 129.16, 128.81, 128.10, 127.66, 125.84, 125.56, 122.61, 121.22, 121.09, 111.21, 110.82,

53.92, 53.70, 51.57, 21.56, 16.93, 14.04. HRMS (ESI, m/z) Calcd for  $C_{33}H_{29}BrN_2O_4S (M+H)^+$ : 629.1104; Found: 629.1106.

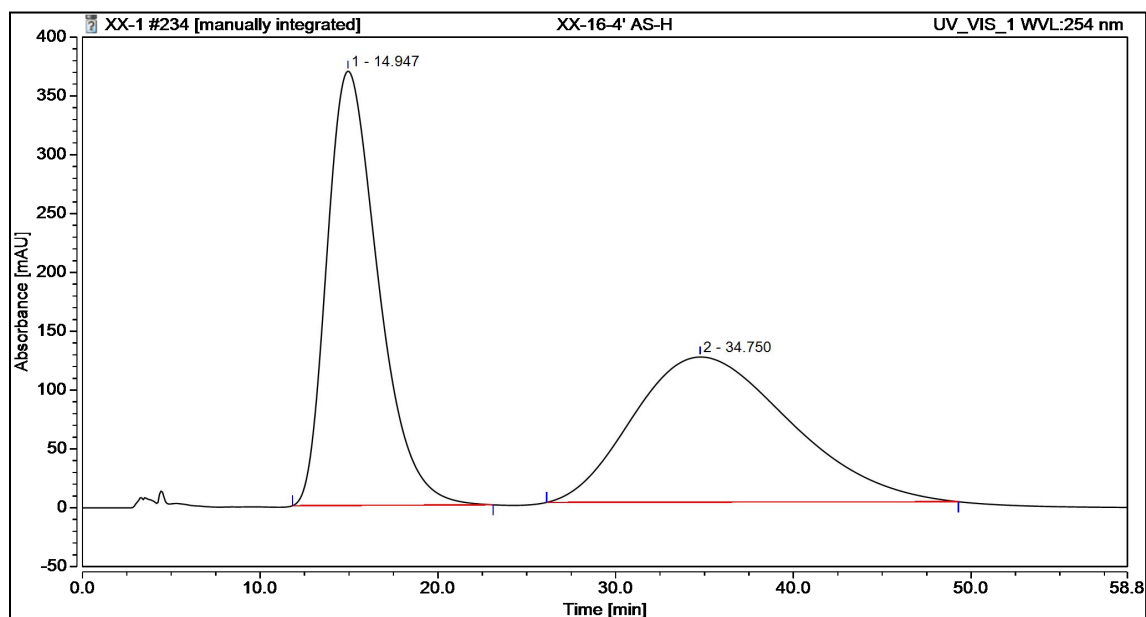

| Integration Results |           |                       |                 |                |                    |                      |                |
|---------------------|-----------|-----------------------|-----------------|----------------|--------------------|----------------------|----------------|
| No.                 | Peak Name | Retention Time<br>min | Area<br>mAU*min | Height<br>mAU  | Relative Area<br>% | Relative Height<br>% | Amount<br>n.a. |
| 1                   |           | 14.947                | 1235.135        | 369.191        | 49.37              | 74.95                | n.a.           |
| 2                   |           | 34.750                | 1266.617        | 123.360        | 50.63              | 25.05                | n.a.           |
| <b>Total:</b>       |           |                       | <b>2501.752</b> | <b>492.551</b> | <b>100.00</b>      | <b>100.00</b>        |                |

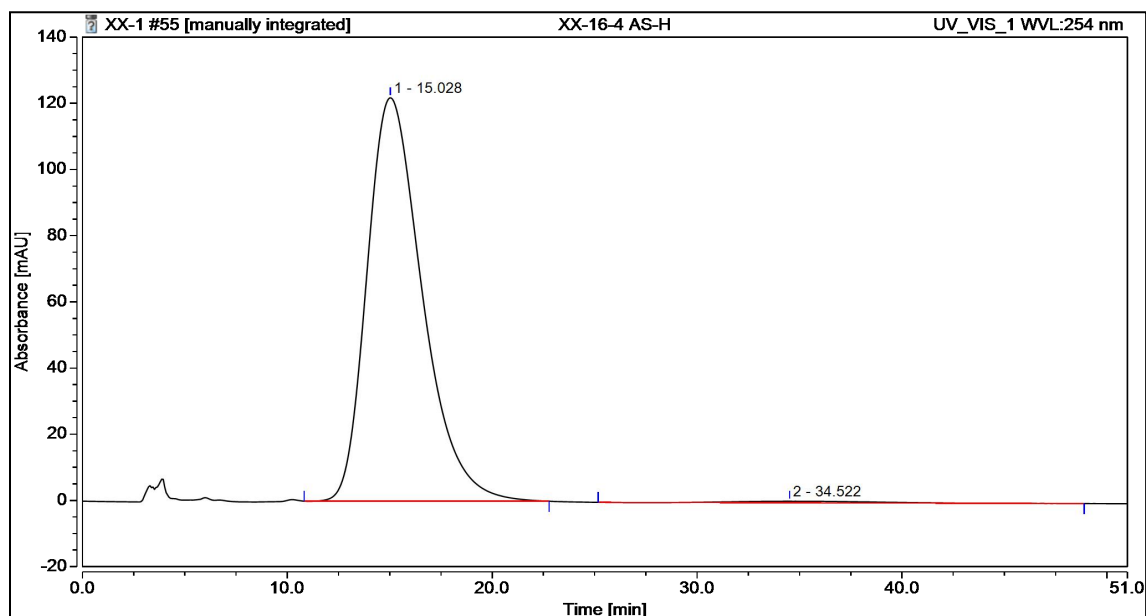

| Integration Results |           |                       |                 |                |                    |                      |                |
|---------------------|-----------|-----------------------|-----------------|----------------|--------------------|----------------------|----------------|
| No.                 | Peak Name | Retention Time<br>min | Area<br>mAU*min | Height<br>mAU  | Relative Area<br>% | Relative Height<br>% | Amount<br>n.a. |
| 1                   |           | 15.028                | 380.009         | 121.924        | 98.99              | 99.60                | n.a.           |
| 2                   |           | 34.522                | 3.869           | 0.491          | 1.01               | 0.40                 | n.a.           |
| <b>Total:</b>       |           |                       | <b>383.878</b>  | <b>122.414</b> | <b>100.00</b>      | <b>100.00</b>        |                |

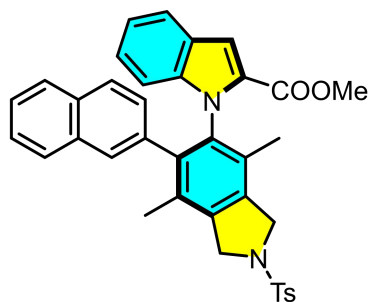

**31**

White solid, 43.2 mg, 72% yield, 98% ee. [Chiral HPLC analysis of the product: Daicel Chiralpak AS-H 250X4.6 mm 5u column; *n*-hexane/2-propanol = 90/10, flow rate = 1.0 mL/min,  $\lambda = 254$  nm,  $t$  (major) = 37.83 min,  $t$  (minor) = 65.27 min].  $[\alpha]_D^{20} = -80.8^\circ$  ( $c = 1.6$ ,  $\text{CHCl}_3$ ).  $^1\text{H NMR}$  (500 MHz,  $\text{CDCl}_3$ )  $\delta$  7.86 (d,  $J = 7.9$  Hz, 2H), 7.68 – 7.56 (m, 2H), 7.51 – 7.15 (m, 8H), 7.10 – 6.87 (m, 4H), 4.84 – 4.62 (m, 4H), 3.71 (d,  $J = 6.7$  Hz, 3H), 2.45 (s, 3H), 1.91 (s, 3H), 1.77 (s, 3H).  $^{13}\text{C NMR}$  (126 MHz,  $\text{CDCl}_3$ )  $\delta$  161.90, 161.77, 143.83, 135.66, 133.91, 130.00, 128.14, 127.69, 127.66, 127.61, 127.38, 127.16, 126.99, 126.94, 126.76, 126.05, 125.87, 125.74, 125.71, 125.69, 125.45, 125.42, 122.46, 120.97, 120.92, 111.50, 111.34, 110.63, 110.47, 53.80, 51.44, 26.94, 21.60, 17.06, 14.19. **HRMS (ESI,  $m/z$ )** Calcd for  $\text{C}_{37}\text{H}_{32}\text{N}_2\text{O}_4\text{S}$  ( $\text{M}+\text{H}$ ) $^+$ : 601.2156; Found: 601.2170.

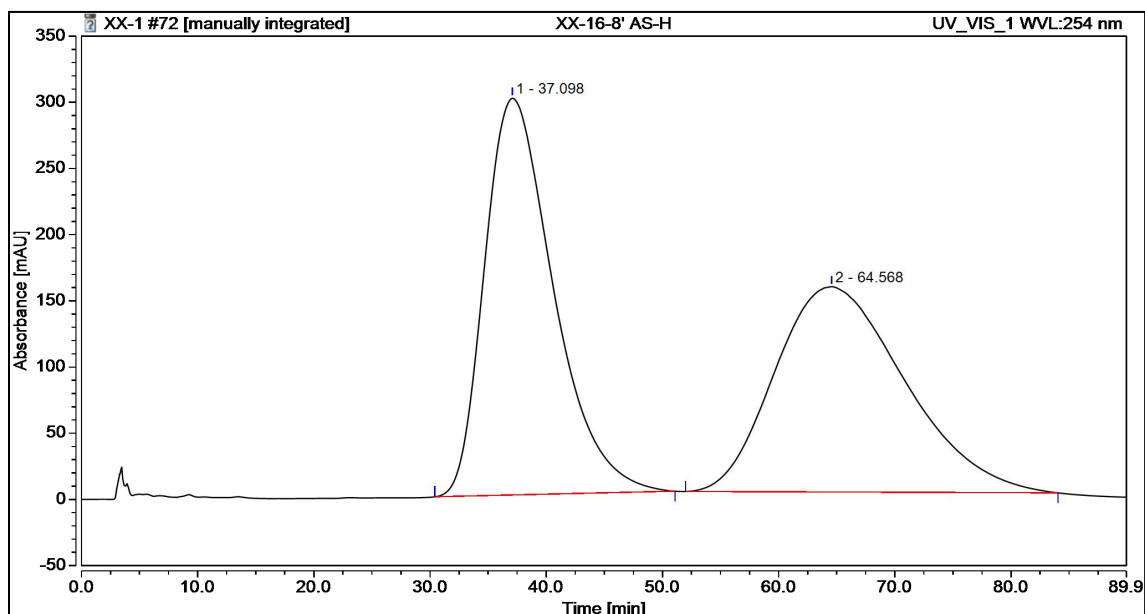

| Integration Results |           |                       |                 |                |                    |                      |                |
|---------------------|-----------|-----------------------|-----------------|----------------|--------------------|----------------------|----------------|
| No.                 | Peak Name | Retention Time<br>min | Area<br>mAU*min | Height<br>mAU  | Relative Area<br>% | Relative Height<br>% | Amount<br>n.a. |
| 1                   |           | 37.098                | 2058.129        | 299.779        | 50.61              | 65.90                | n.a.           |
| 2                   |           | 64.568                | 2008.827        | 155.127        | 49.39              | 34.10                | n.a.           |
| <b>Total:</b>       |           |                       | <b>4066.956</b> | <b>454.906</b> | <b>100.00</b>      | <b>100.00</b>        |                |

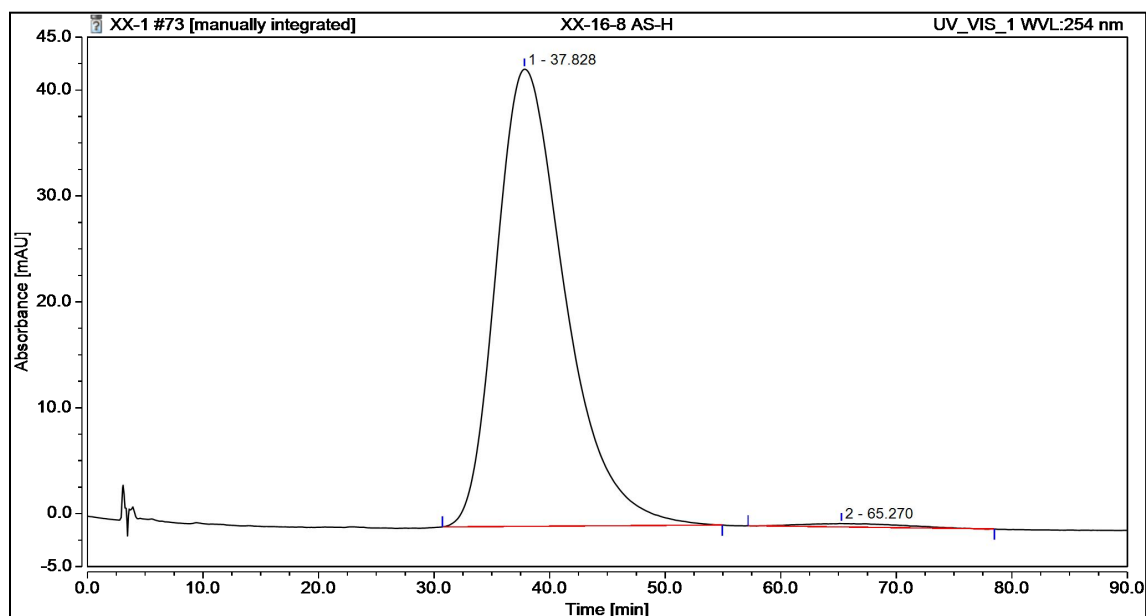

| Integration Results |           |                       |                 |               |                    |                      |                |
|---------------------|-----------|-----------------------|-----------------|---------------|--------------------|----------------------|----------------|
| No.                 | Peak Name | Retention Time<br>min | Area<br>mAU*min | Height<br>mAU | Relative Area<br>% | Relative Height<br>% | Amount<br>n.a. |
| 1                   |           | 37.828                | 298.598         | 43.182        | 98.87              | 99.24                | n.a.           |
| 2                   |           | 65.270                | 3.398           | 0.332         | 1.13               | 0.76                 | n.a.           |
| Total:              |           |                       | 301.996         | 43.515        | 100.00             | 100.00               |                |

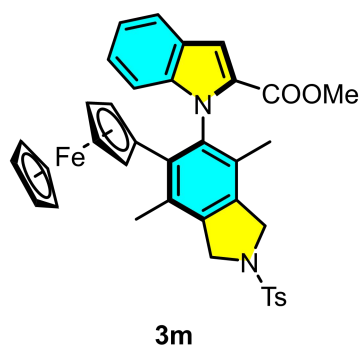

Brown solid, 30.9 mg, 47% yield, 80% ee. [Chiral HPLC analysis of the product: Phenomenex 00G-4457-E0 250X4.6 mm 5u column; *n*-hexane/2-propanol = 70/30, flow rate = 1.0 mL/min,  $\lambda$  = 254 nm,  $t$  (major) = 40.23 min,  $t$  (minor) = 30.50 min].  $[\alpha]_D^{20}$  = 54.3° ( $c$  = 0.8,  $\text{CHCl}_3$ ).  $^1\text{H NMR}$  (500 MHz,  $\text{CDCl}_3$ )  $\delta$  7.84 (d,  $J$  = 8.4 Hz, 2H), 7.67 (d,  $J$  = 8.0 Hz, 1H), 7.38 (d,  $J$  = 8.1 Hz, 2H), 7.25 (d,  $J$  = 9.4 Hz, 1H), 7.23 – 7.19 (m, 1H), 7.14 (t,  $J$  = 7.5 Hz, 1H), 6.76 (d,  $J$  = 9.3 Hz, 1H), 4.77 (d,  $J$  = 12.3 Hz, 1H), 4.66 (d,  $J$  = 11.9 Hz, 2H), 4.56 (d,  $J$  = 15.1 Hz, 1H), 4.00 (s, 6H), 3.84 (d,  $J$  = 8.7 Hz, 2H), 3.62 (s, 3H), 3.29 (s, 1H), 2.82 (s, 3H), 2.46 (s, 3H), 1.57 (s, 3H).  $^{13}\text{C NMR}$  (126 MHz,  $\text{CDCl}_3$ )  $\delta$  161.78, 143.82, 139.89, 139.74, 135.91, 135.78, 135.69, 135.35, 130.69, 130.59, 129.97, 129.53, 129.16, 128.81, 128.10, 127.66, 125.84, 125.56,



122.61, 121.22, 121.09, 111.21, 110.82, 53.92, 53.70, 51.57, 21.56, 16.93, 14.04.

HRMS (ESI, m/z) Calcd for C<sub>37</sub>H<sub>34</sub>FeN<sub>2</sub>O<sub>4</sub>S (M+H)<sup>+</sup>: 659.1661; Found: 659.1661.

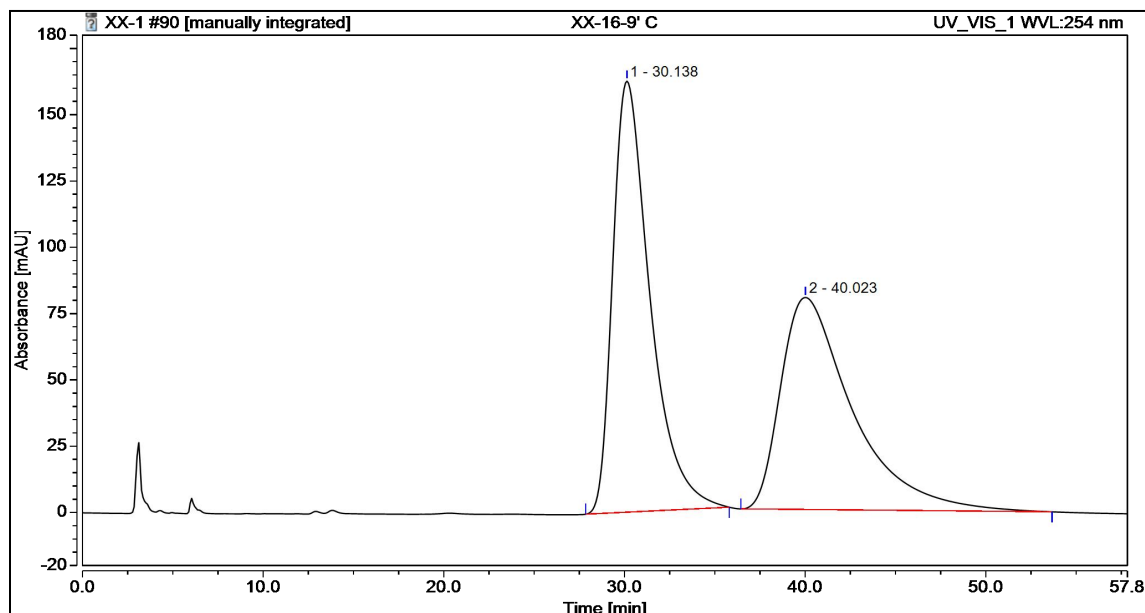

| Integration Results |           |                       |                 |                |                    |                      |                |
|---------------------|-----------|-----------------------|-----------------|----------------|--------------------|----------------------|----------------|
| No.                 | Peak Name | Retention Time<br>min | Area<br>mAU*min | Height<br>mAU  | Relative Area<br>% | Relative Height<br>% | Amount<br>n.a. |
| 1                   |           | 30.138                | 388.759         | 162.575        | 51.39              | 67.03                | n.a.           |
| 2                   |           | 40.023                | 367.720         | 79.961         | 48.61              | 32.97                | n.a.           |
| <b>Total:</b>       |           |                       | <b>756.480</b>  | <b>242.535</b> | <b>100.00</b>      | <b>100.00</b>        |                |

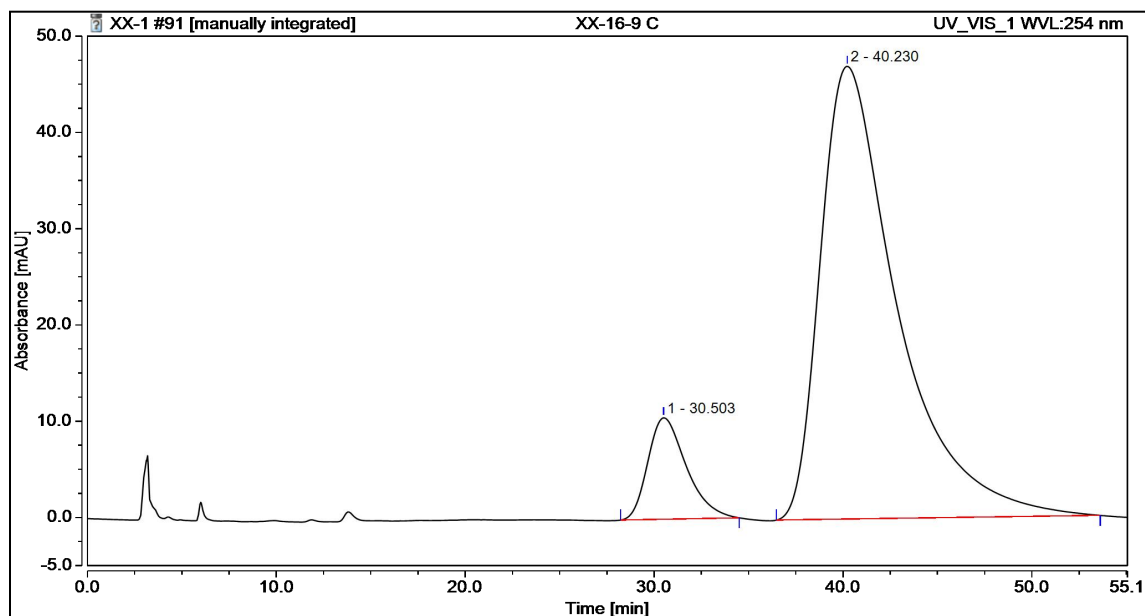

| Integration Results |           |                       |                 |               |                    |                      |                |
|---------------------|-----------|-----------------------|-----------------|---------------|--------------------|----------------------|----------------|
| No.                 | Peak Name | Retention Time<br>min | Area<br>mAU*min | Height<br>mAU | Relative Area<br>% | Relative Height<br>% | Amount<br>n.a. |
| 1                   |           | 30.503                | 24.859          | 10.548        | 10.08              | 18.32                | n.a.           |
| 2                   |           | 40.230                | 221.674         | 47.034        | 89.92              | 81.68                | n.a.           |
| <b>Total:</b>       |           |                       | <b>246.533</b>  | <b>57.582</b> | <b>100.00</b>      | <b>100.00</b>        |                |

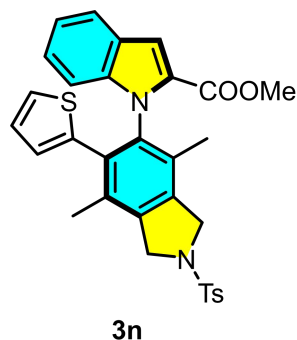

White solid, 47.2 mg, 85% yield, 96% ee. [Chiral HPLC analysis of the product: Daicel Chiralpak OD-H 250X4.6 mm 5u column; *n*-hexane/2-propanol = 90/10, flow rate = 1.0 mL/min,  $\lambda = 254$  nm,  $t$  (major) = 11.70 min,  $t$  (minor) = 27.55 min].  $[\alpha]_D^{20} = -19.4^\circ$  ( $c = 0.35$ ,  $\text{CHCl}_3$ ).  **$^1\text{H NMR}$  (500 MHz,  $\text{CDCl}_3$ )**  $\delta$  7.84 (d,  $J = 8.3$  Hz, 2H), 7.58 (d,  $J = 7.9$  Hz, 1H), 7.38 (d,  $J = 8.0$  Hz, 2H), 7.23 (t,  $J = 7.1$  Hz, 1H), 7.14 (s, 1H), 7.11 (dd,  $J = 8.5, 6.5$  Hz, 1H), 6.99 (d,  $J = 5.1$  Hz, 1H), 6.83 (d,  $J = 7.4$  Hz, 1H), 6.65 (dd,  $J = 5.1, 3.5$  Hz, 1H), 6.37 (dd,  $J = 3.5, 1.2$  Hz, 1H), 4.78 – 4.61 (m, 4H), 3.74 (s, 3H), 2.46 (s, 3H), 2.01 (s, 3H), 1.74 (s, 3H).  **$^{13}\text{C NMR}$  (126 MHz,  $\text{CDCl}_3$ )**  $\delta$  161.74, 143.84, 139.98, 137.19, 136.62, 136.01, 135.65, 133.92, 133.78, 131.28, 129.99, 128.92, 128.62, 127.64, 126.92, 126.08, 125.92, 125.63, 125.41, 122.46, 121.04, 111.38, 110.45, 53.95, 53.75, 51.58, 21.56, 17.08, 14.19. **HRMS (ESI,  $m/z$ )** Calcd for  $\text{C}_{31}\text{H}_{28}\text{N}_2\text{O}_4\text{S}_2$  ( $\text{M}+\text{H}$ ) $^+$ : 557.1563; Found: 557.1565.

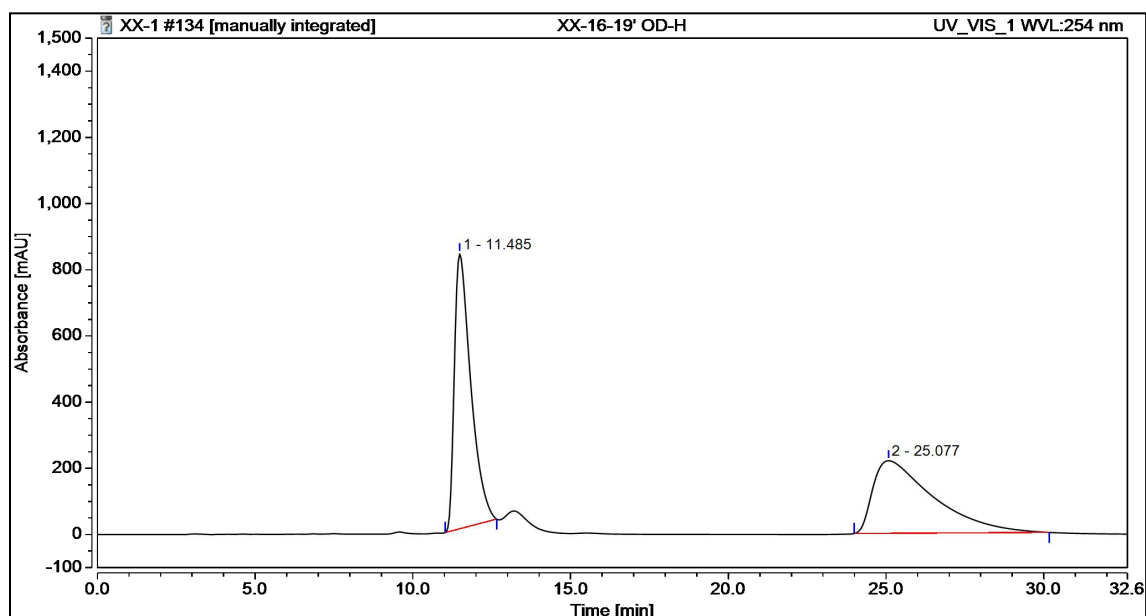

| Integration Results |           |                       |                 |                 |                    |                      |                |
|---------------------|-----------|-----------------------|-----------------|-----------------|--------------------|----------------------|----------------|
| No.                 | Peak Name | Retention Time<br>min | Area<br>mAU*min | Height<br>mAU   | Relative Area<br>% | Relative Height<br>% | Amount<br>n.a. |
| 1                   |           | 11.485                | 502.779         | 830.884         | 50.80              | 79.09                | n.a.           |
| 2                   |           | 25.077                | 487.036         | 219.620         | 49.20              | 20.91                | n.a.           |
| <b>Total:</b>       |           |                       | <b>989.815</b>  | <b>1050.504</b> | <b>100.00</b>      | <b>100.00</b>        |                |

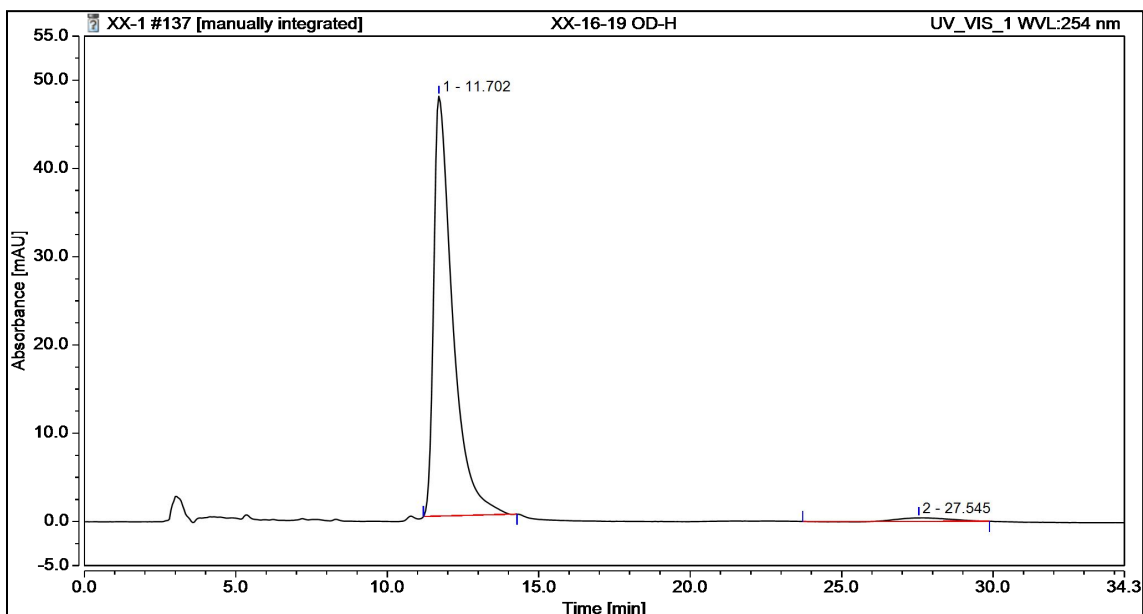

| Integration Results |           |                       |                 |               |                    |                      |                |
|---------------------|-----------|-----------------------|-----------------|---------------|--------------------|----------------------|----------------|
| No.                 | Peak Name | Retention Time<br>min | Area<br>mAU*min | Height<br>mAU | Relative Area<br>% | Relative Height<br>% | Amount<br>n.a. |
| 1                   |           | 11.702                | 34.469          | 47.588        | 97.94              | 99.17                | n.a.           |
| 2                   |           | 27.545                | 0.726           | 0.399         | 2.06               | 0.83                 | n.a.           |
| <b>Total:</b>       |           |                       | <b>35.195</b>   | <b>47.987</b> | <b>100.00</b>      | <b>100.00</b>        |                |

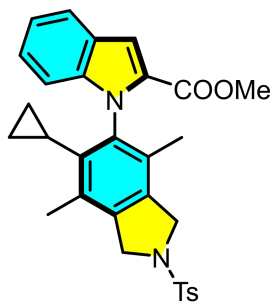

**3o**

White solid, 44.2 mg, 86% yield, 80% ee. [Chiral HPLC analysis of the product: Daicel Chiralpak OD-H 250X4.6 mm 5u column; *n*-hexane/2-propanol = 90/10, flow rate = 1.0 mL/min,  $\lambda$  = 254 nm, *t* (major) = 9.27 min, *t* (minor) = 17.65 min].  $[\alpha]_D^{20}$  = 34.0° (*c* = 1.9, CHCl<sub>3</sub>). <sup>1</sup>H NMR (500 MHz, CDCl<sub>3</sub>) <sup>1</sup>H NMR (500 MHz, Chloroform-*d*)  $\delta$  7.82 (d, *J* = 8.2 Hz, 2H), 7.73 (d, *J* = 7.9 Hz, 1H), 7.43 (s, 1H), 7.36 (d, *J* = 8.1 Hz, 2H), 7.22 (t, *J* = 8.2 Hz, 1H), 7.16 (t, *J* = 7.5 Hz, 1H), 6.72 (d, *J* = 8.0 Hz, 1H), 4.75 – 4.51 (m, 4H), 3.76 (s, 3H), 2.44 (s, 3H), 2.30 (s, 3H), 1.62 (s, 3H).

<sup>13</sup>C NMR (126 MHz, CDCl<sub>3</sub>) δ 161.78, 143.70, 139.59, 138.20, 137.69, 135.43, 134.03, 133.85, 131.85, 129.91, 128.51, 128.47, 127.62, 126.02, 125.58, 122.60, 121.04, 111.37, 110.63, 53.97, 53.70, 51.63, 21.53, 16.56, 13.92, 10.98, 5.92, 5.47.

HRMS (ESI, m/z) Calcd for C<sub>30</sub>H<sub>30</sub>N<sub>2</sub>O<sub>4</sub>S (M+H)<sup>+</sup>: 515.1999; Found: 515.2001.

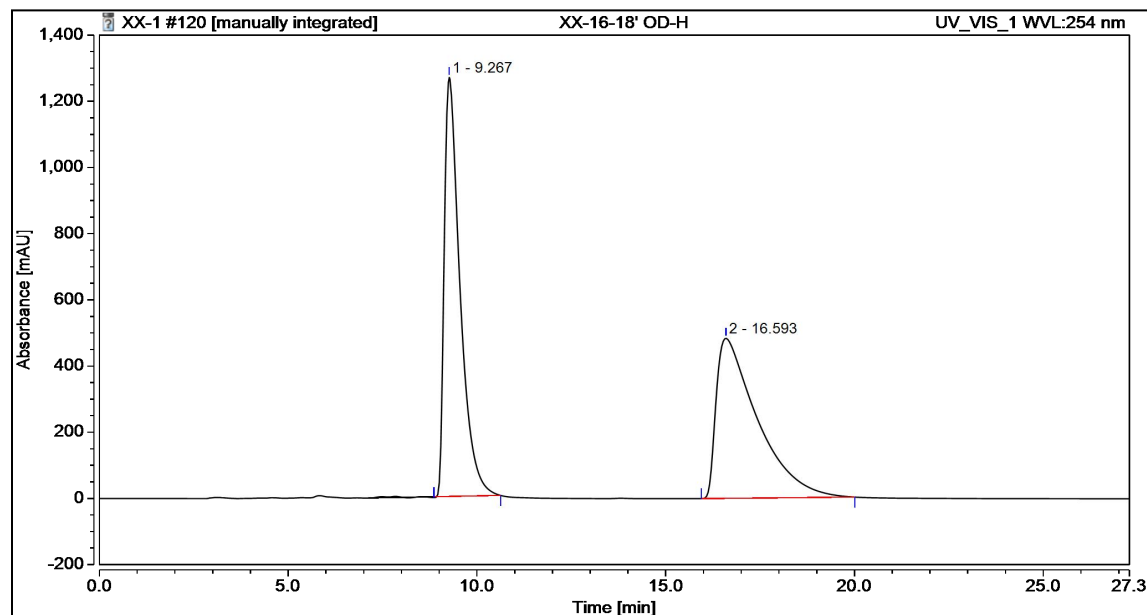

| Integration Results |           |                    |              |            |                 |                   |             |
|---------------------|-----------|--------------------|--------------|------------|-----------------|-------------------|-------------|
| No.                 | Peak Name | Retention Time min | Area mAU*min | Height mAU | Relative Area % | Relative Height % | Amount n.a. |
| 1                   |           | 9.267              | 613.566      | 1266.254   | 50.05           | 72.35             | n.a.        |
| 2                   |           | 16.593             | 612.219      | 483.866    | 49.95           | 27.65             | n.a.        |
| Total:              |           |                    | 1225.785     | 1750.120   | 100.00          | 100.00            |             |

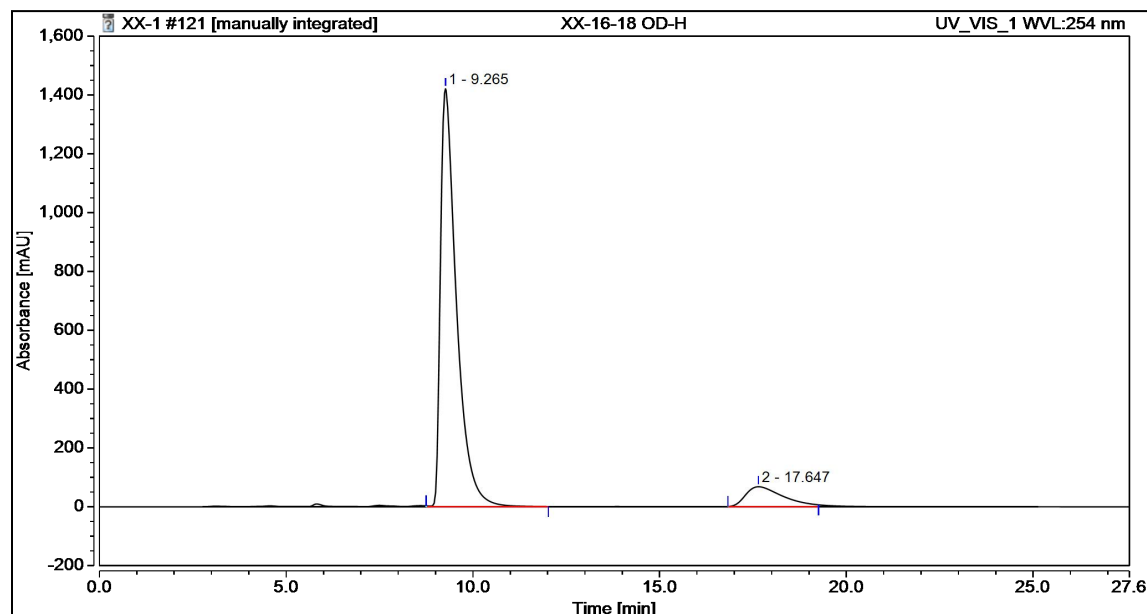

| Integration Results |           |                    |              |            |                 |                   |             |
|---------------------|-----------|--------------------|--------------|------------|-----------------|-------------------|-------------|
| No.                 | Peak Name | Retention Time min | Area mAU*min | Height mAU | Relative Area % | Relative Height % | Amount n.a. |
| 1                   |           | 9.265              | 707.902      | 1421.252   | 89.87           | 95.42             | n.a.        |
| 2                   |           | 17.647             | 79.778       | 68.279     | 10.13           | 4.58              | n.a.        |
| Total:              |           |                    | 787.680      | 1489.531   | 100.00          | 100.00            |             |

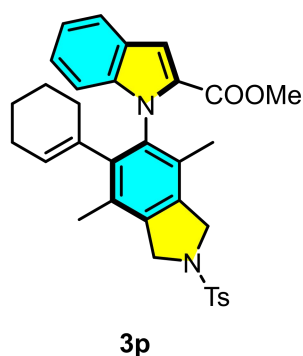

White solid, 18.8 mg, 34% yield, 98% ee. [Chiral HPLC analysis of the product: Daicel Chiralpak OD-H 250X4.6 mm 5u column; *n*-hexane/2-propanol = 90/10, flow rate = 1.0 mL/min,  $\lambda = 254$  nm,  $t$  (major) = 7.48 min,  $t$  (minor) = 19.69 min].  $[\alpha]_D^{20} = 25.4^\circ$  ( $c = 0.8$ ,  $\text{CHCl}_3$ ).  **$^1\text{H NMR}$  (500 MHz,  $\text{CDCl}_3$ )**  $\delta$  7.83 (dd,  $J = 8.3, 2.2$  Hz, 2H), 7.68 (t,  $J = 8.1$  Hz, 1H), 7.37 (d,  $J = 8.3$  Hz, 2H), 7.26 (s, 1H), 7.23 – 7.18 (m, 1H), 7.16 – 7.11 (m, 1H), 6.76 (d,  $J = 7.2$  Hz, 1H), 5.06 (d,  $J = 132.0$  Hz, 1H), 4.75 – 4.55 (m, 4H), 3.74 (d,  $J = 7.3$  Hz, 3H), 2.46 (s, 3H), 2.06 (d,  $J = 7.9$  Hz, 3H), 1.77 (s, 3H), 1.71 (s, 2H), 1.54 (s, 2H), 1.26 (s, 2H), 1.00 – 0.80 (m, 2H).  **$^{13}\text{C NMR}$  (126 MHz,  $\text{CDCl}_3$ )**  $\delta$  161.96, 143.74, 142.97, 140.64, 139.75, 135.41, 134.42, 133.82, 129.98, 129.95, 128.54, 127.66, 127.14, 126.58, 125.93, 125.22, 122.41, 120.94, 112.11, 111.43, 110.64, 109.81, 53.99, 53.69, 51.57, 28.96, 25.15, 22.29, 21.57, 16.24, 14.24. **HRMS (ESI,  $m/z$ )** Calcd for  $\text{C}_{33}\text{H}_{34}\text{N}_2\text{O}_4\text{S}$  ( $\text{M}+\text{H}$ ) $^+$ : 555.2312; Found: 555.2326.

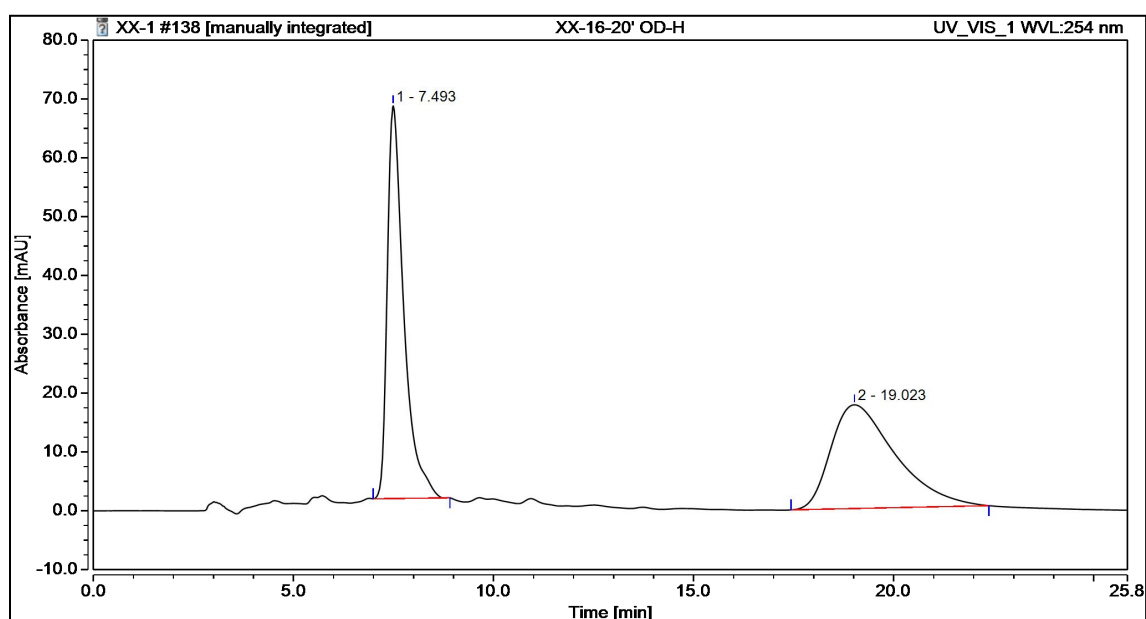

| Integration Results |           |                       |                 |               |                    |                      |                |
|---------------------|-----------|-----------------------|-----------------|---------------|--------------------|----------------------|----------------|
| No.                 | Peak Name | Retention Time<br>min | Area<br>mAU*min | Height<br>mAU | Relative Area<br>% | Relative Height<br>% | Amount<br>n.a. |
| 1                   |           | 7.493                 | 32.011          | 66.749        | 49.32              | 79.10                | n.a.           |
| 2                   |           | 19.023                | 32.896          | 17.636        | 50.68              | 20.90                | n.a.           |
| <b>Total:</b>       |           |                       | <b>64.907</b>   | <b>84.386</b> | <b>100.00</b>      | <b>100.00</b>        |                |

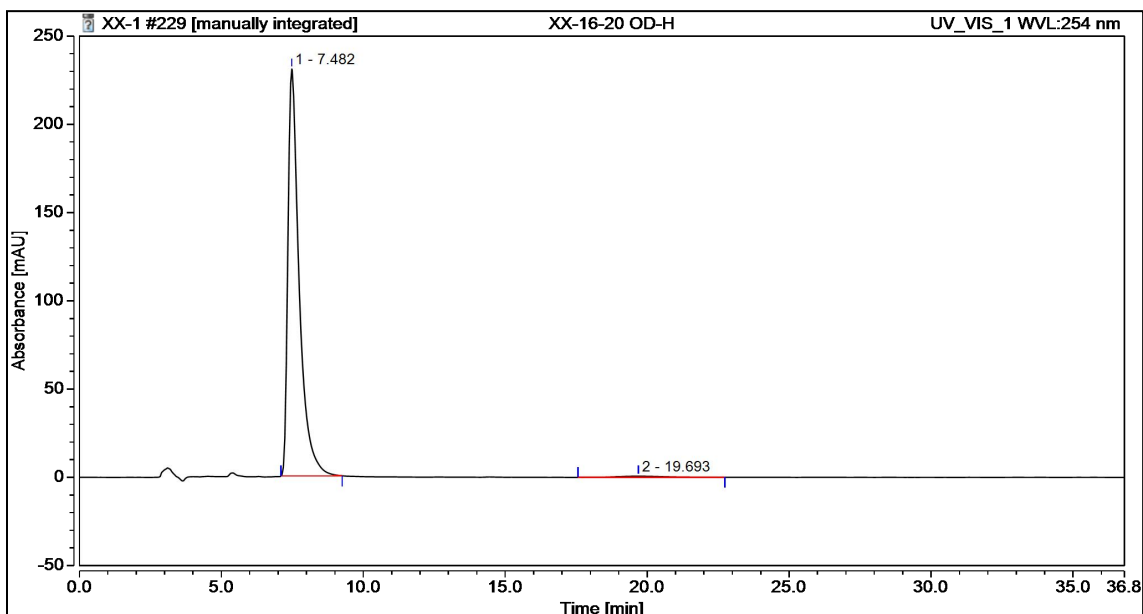

| Integration Results |           |                       |                 |                |                    |                      |                |
|---------------------|-----------|-----------------------|-----------------|----------------|--------------------|----------------------|----------------|
| No.                 | Peak Name | Retention Time<br>min | Area<br>mAU*min | Height<br>mAU  | Relative Area<br>% | Relative Height<br>% | Amount<br>n.a. |
| 1                   |           | 7.482                 | 106.315         | 230.588        | 98.79              | 99.72                | n.a.           |
| 2                   |           | 19.693                | 1.305           | 0.652          | 1.21               | 0.28                 | n.a.           |
| <b>Total:</b>       |           |                       | <b>107.620</b>  | <b>231.240</b> | <b>100.00</b>      | <b>100.00</b>        |                |

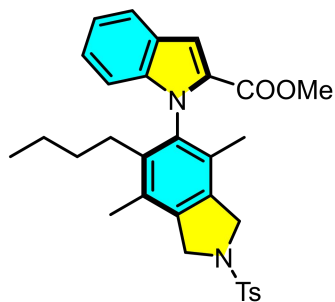

**3q**

White solid, 14.3 mg, 27% yield, 88% ee. [Chiral HPLC analysis of the product: Daicel Chiralpak OD-H 250X4.6 mm 5u column; *n*-hexane/2-propanol = 80/20, flow rate = 1.0 mL/min,  $\lambda$  = 254 nm,  $t$  (major) = 5.38 min,  $t$  (minor) = 9.69 min].  $[\alpha]_D^{20}$  = 20.8° ( $c$  = 1.8,  $\text{CHCl}_3$ ).  $^1\text{H NMR}$  (500 MHz,  $\text{CDCl}_3$ )  $\delta$  7.82 (d,  $J$  = 8.2 Hz, 2H), 7.73 (d,  $J$  = 8.1 Hz, 1H), 7.43 (s, 1H), 7.36 (d,  $J$  = 8.0 Hz, 2H), 7.24 – 7.14 (m, 2H), 6.73 (d,  $J$  = 7.2 Hz, 1H), 4.74 – 4.64 (m, 2H), 4.58 (dd,  $J$  = 22.6, 14.0 Hz, 2H), 3.75 (s, 3H), 2.42 (s, 3H), 2.17 (s, 3H), 2.09 – 2.03 (m, 1H), 1.97 – 1.90 (m, 1H), 1.59 (s, 3H), 1.12

– 1.03 (m, 2H), 0.97 (dt,  $J = 14.6, 6.9$  Hz, 2H), 0.54 (d,  $J = 7.2$  Hz, 3H).  $^{13}\text{C}$  NMR (126 MHz,  $\text{CDCl}_3$ )  $\delta$  161.61, 143.71, 139.84, 139.81, 135.96, 135.78, 133.98, 133.11, 129.93, 129.02, 128.98, 128.30, 127.64, 126.05, 125.58, 122.54, 121.24, 111.44, 110.81, 54.06, 53.63, 51.64, 31.72, 26.93, 22.80, 21.56, 15.82, 13.99, 13.40. HRMS (ESI,  $m/z$ ) Calcd for  $\text{C}_{31}\text{H}_{34}\text{N}_2\text{O}_4\text{S}$  ( $\text{M}+\text{H}$ ) $^+$ : 531.2312; Found: 531.2319.

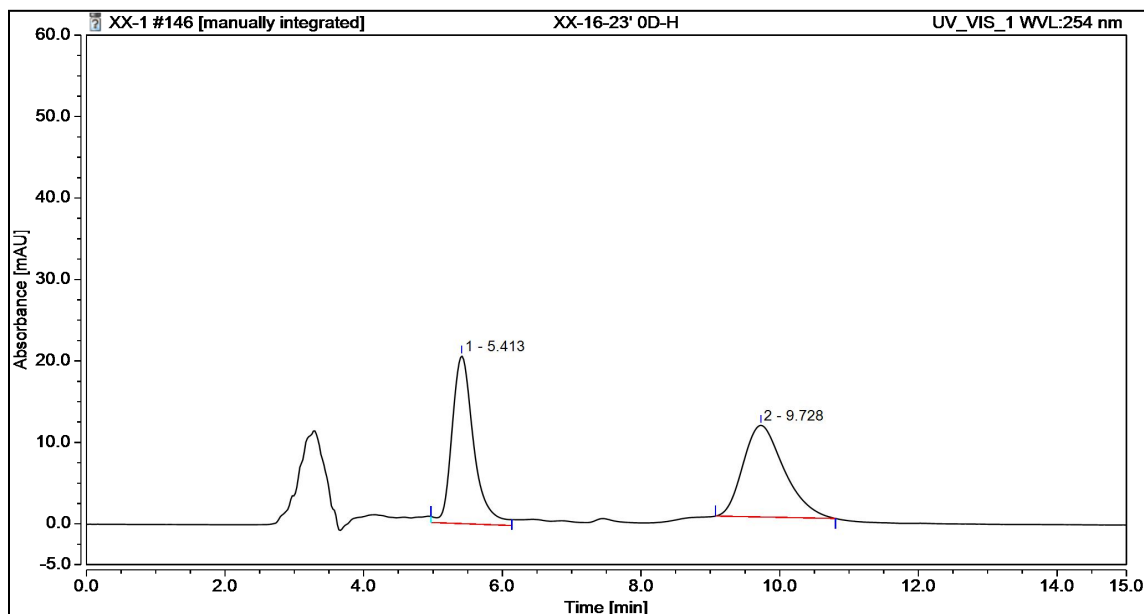

| Integration Results |           |                    |              |            |                 |                   |        |
|---------------------|-----------|--------------------|--------------|------------|-----------------|-------------------|--------|
| No.                 | Peak Name | Retention Time min | Area mAU*min | Height mAU | Relative Area % | Relative Height % | Amount |
| 1                   |           | 5.413              | 7.485        | 20.579     | 49.25           | 64.65             | n.a.   |
| 2                   |           | 9.728              | 7.713        | 11.251     | 50.75           | 35.35             | n.a.   |
| Total:              |           |                    | 15.198       | 31.830     | 100.00          | 100.00            |        |

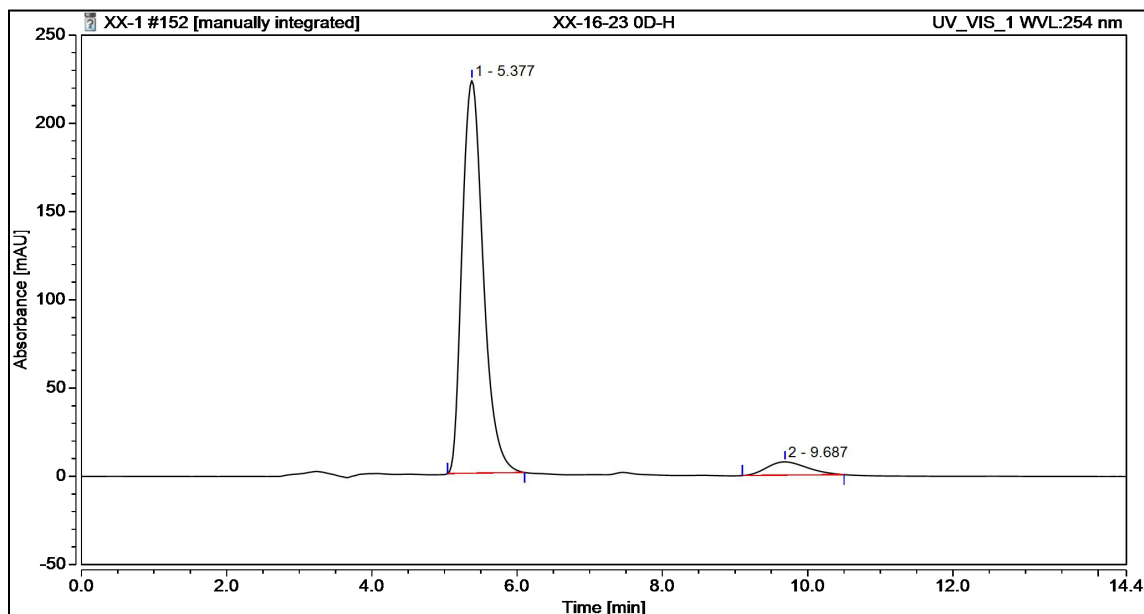

| Integration Results |           |                       |                 |                |                    |                      |                |
|---------------------|-----------|-----------------------|-----------------|----------------|--------------------|----------------------|----------------|
| No.                 | Peak Name | Retention Time<br>min | Area<br>mAU*min | Height<br>mAU  | Relative Area<br>% | Relative Height<br>% | Amount<br>n.a. |
| 1                   |           | 5.377                 | 74.917          | 222.535        | 93.92              | 96.73                | n.a.           |
| 2                   |           | 9.687                 | 4.849           | 7.525          | 6.08               | 3.27                 | n.a.           |
| <b>Total:</b>       |           |                       | <b>79.766</b>   | <b>230.059</b> | <b>100.00</b>      | <b>100.00</b>        |                |

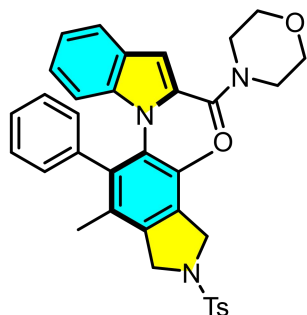

**3r**

White solid, 48.4 mg, 80% yield, 99% ee. [Chiral HPLC analysis of the product: Daicel Chiralpak OD-H 250X4.6 mm 5u column; *n*-hexane/2-propanol = 90/10, flow rate = 1.0 mL/min,  $\lambda$  = 254 nm, *t* (major) = 23.36 min, *t* (minor) = 45.42 min].  $[\alpha]_D^{20}$  = - 124.1°(c = 0.9, CHCl<sub>3</sub>). **<sup>1</sup>H NMR (500 MHz, CDCl<sub>3</sub>)**  $\delta$  7.84 (d, *J* = 8.3 Hz, 2H), 7.53 (d, *J* = 7.9 Hz, 1H), 7.38 (d, *J* = 8.0 Hz, 2H), 7.25 – 7.17 (m, 2H), 7.15 – 7.10 (m, 1H), 7.07 – 7.01 (m, 2H), 6.90 (d, *J* = 9.2 Hz, 1H), 6.82 (t, *J* = 8.3 Hz, 1H), 6.48 (d, *J* = 7.8 Hz, 1H), 6.43 (s, 1H), 4.77 (td, *J* = 12.7, 2.8 Hz, 2H), 4.61 (dd, *J* = 21.7, 14.6 Hz, 2H), 3.79 – 3.24 (m, 8H), 2.47 (s, 3H), 1.89 (s, 3H), 1.80 (s, 3H). **<sup>13</sup>C NMR (126 MHz, CDCl<sub>3</sub>)**  $\delta$  162.07, 143.81, 140.19, 138.88, 137.28, 135.70, 135.34, 135.00, 133.90, 130.34, 129.98, 129.92, 129.15, 129.03, 127.93, 127.84, 127.65, 127.49, 126.94, 125.52, 124.45, 121.65, 120.78, 111.11, 105.83, 66.81, 54.01, 53.76, 21.58, 17.11, 14.66. **HRMS (ESI, m/z)** Calcd for C<sub>36</sub>H<sub>35</sub>N<sub>3</sub>O<sub>4</sub>S (M+H)<sup>+</sup>: 606.2421; Found: 606.2428.



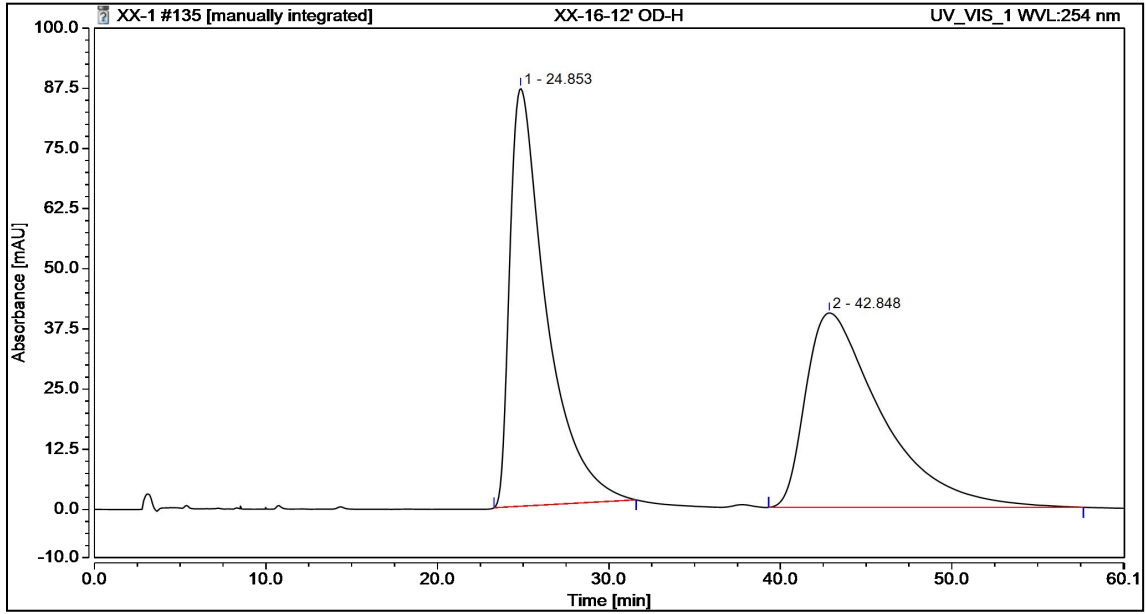

| Integration Results |           |                       |                 |                |                    |                      |                |
|---------------------|-----------|-----------------------|-----------------|----------------|--------------------|----------------------|----------------|
| No.                 | Peak Name | Retention Time<br>min | Area<br>mAU*min | Height<br>mAU  | Relative Area<br>% | Relative Height<br>% | Amount<br>n.a. |
| 1                   |           | 24.853                | 214.024         | 86.803         | 50.81              | 68.25                | n.a.           |
| 2                   |           | 42.848                | 207.207         | 40.388         | 49.19              | 31.75                | n.a.           |
| <b>Total:</b>       |           |                       | <b>421.231</b>  | <b>127.191</b> | <b>100.00</b>      | <b>100.00</b>        |                |

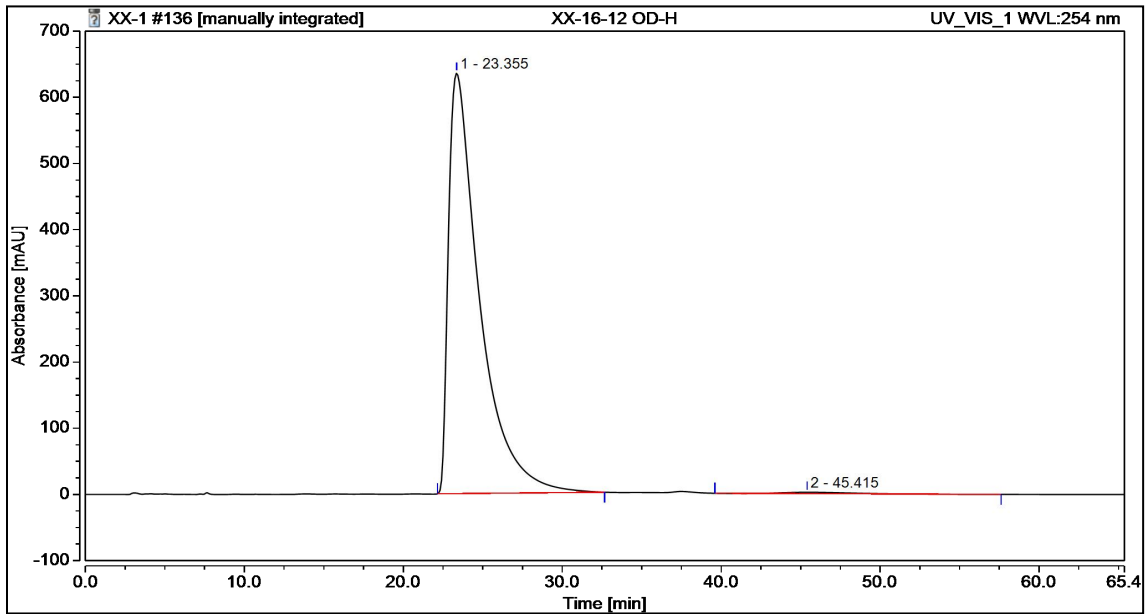

| Integration Results |           |                       |                 |                |                    |                      |                |
|---------------------|-----------|-----------------------|-----------------|----------------|--------------------|----------------------|----------------|
| No.                 | Peak Name | Retention Time<br>min | Area<br>mAU*min | Height<br>mAU  | Relative Area<br>% | Relative Height<br>% | Amount<br>n.a. |
| 1                   |           | 23.355                | 1432.948        | 635.384        | 99.38              | 99.68                | n.a.           |
| 2                   |           | 45.415                | 8.908           | 2.023          | 0.62               | 0.32                 | n.a.           |
| <b>Total:</b>       |           |                       | <b>1441.856</b> | <b>637.406</b> | <b>100.00</b>      | <b>100.00</b>        |                |

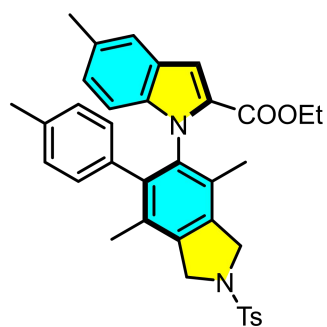

**3s**

White solid, 34.3 mg, 58% yield, 98% ee. [Chiral HPLC analysis of the product: Daicel Chiralpak OD-H 250X4.6 mm 5u column; *n*-hexane/2-propanol = 95/5, flow rate = 1.0 mL/min,  $\lambda = 254$  nm,  $t$  (major) = 10.94 min,  $t$  (minor) = 15.20 min].  $[\alpha]_D^{20} = -42.7^\circ$  ( $c = 0.4$ ,  $\text{CHCl}_3$ ).  **$^1\text{H NMR}$  (500 MHz,  $\text{CDCl}_3$ )**  $\delta$  7.84 (d,  $J = 8.2$  Hz, 2H), 7.38 (d,  $J = 8.0$  Hz, 2H), 7.31 (s, 1H), 7.26 (s, 1H), 7.04 (d,  $J = 8.5$  Hz, 1H), 6.90 (d,  $J = 9.7$  Hz, 1H), 6.81 (d,  $J = 7.8$  Hz, 1H), 6.75 (d,  $J = 8.5$  Hz, 1H), 6.63 (d,  $J = 7.8$  Hz, 1H), 6.42 (d,  $J = 9.8$  Hz, 1H), 4.77 – 4.59 (m, 4H), 4.24 – 4.08 (m, 2H), 2.47 (s, 3H), 2.40 (s, 3H), 2.15 (s, 3H), 1.89 (s, 3H), 1.70 (s, 3H), 1.23 (t,  $J = 7.1$  Hz, 3H).  **$^{13}\text{C NMR}$  (126 MHz,  $\text{CDCl}_3$ )**  $\delta$  161.39, 143.76, 141.12, 138.30, 136.33, 136.13, 135.33, 134.58, 133.92, 130.05, 129.95, 129.33, 128.79, 128.60, 128.50, 128.14, 127.66, 127.59, 127.18, 126.02, 121.63, 111.09, 109.65, 60.24, 54.00, 53.74, 21.58, 21.39, 21.11, 17.00, 14.26, 14.11. **HRMS (ESI,  $m/z$ )** Calcd for  $\text{C}_{36}\text{H}_{36}\text{N}_2\text{O}_4\text{S}$  ( $\text{M}+\text{H}$ ) $^+$ : 593.2468; Found: 593.2482.

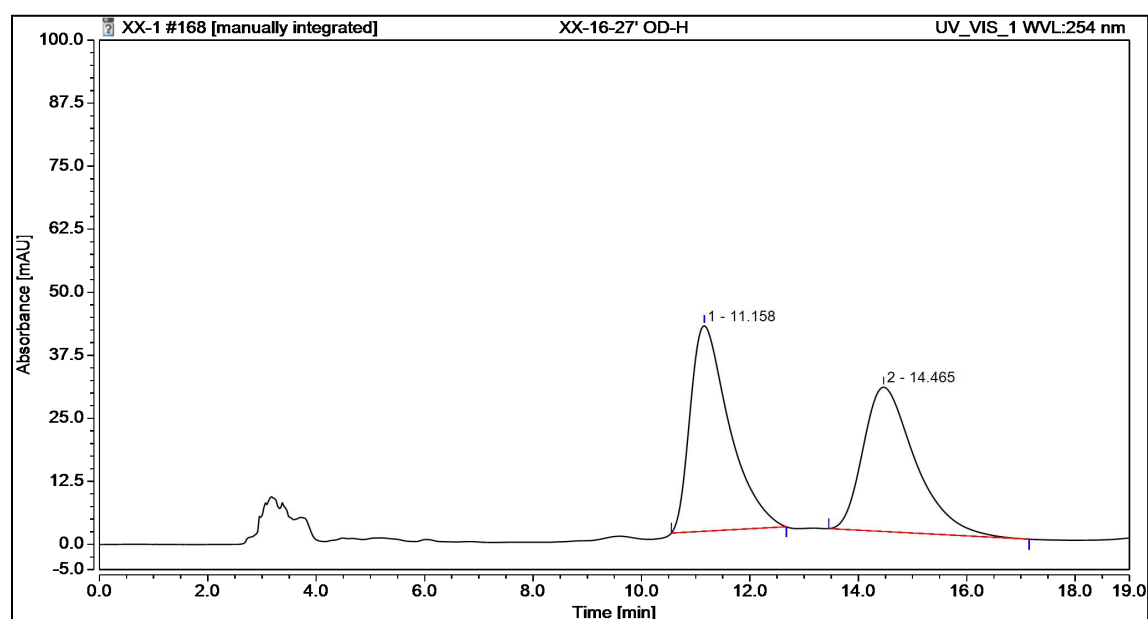

| Integration Results |           |                       |                 |               |                    |                      |                |
|---------------------|-----------|-----------------------|-----------------|---------------|--------------------|----------------------|----------------|
| No.                 | Peak Name | Retention Time<br>min | Area<br>mAU*min | Height<br>mAU | Relative Area<br>% | Relative Height<br>% | Amount<br>n.a. |
| 1                   |           | 11.158                | 34.158          | 40.771        | 51.68              | 58.74                | n.a.           |
| 2                   |           | 14.465                | 31.941          | 28.635        | 48.32              | 41.26                | n.a.           |
| <b>Total:</b>       |           |                       | <b>66.099</b>   | <b>69.406</b> | <b>100.00</b>      | <b>100.00</b>        |                |

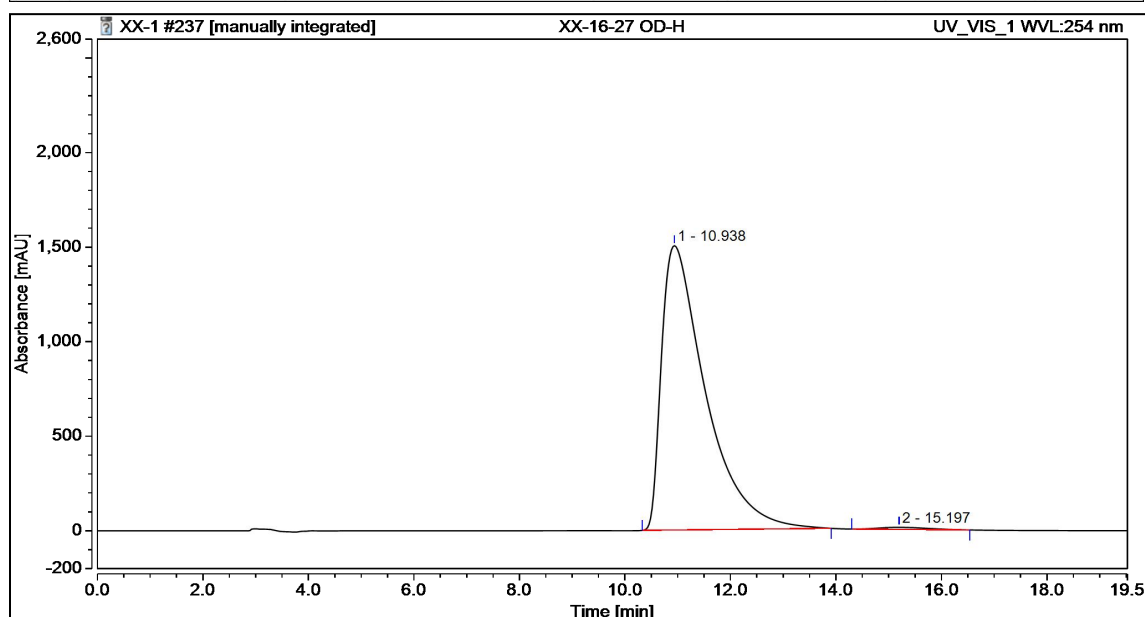

| Integration Results |           |                       |                 |                 |                    |                      |                |
|---------------------|-----------|-----------------------|-----------------|-----------------|--------------------|----------------------|----------------|
| No.                 | Peak Name | Retention Time<br>min | Area<br>mAU*min | Height<br>mAU   | Relative Area<br>% | Relative Height<br>% | Amount<br>n.a. |
| 1                   |           | 10.938                | 1452.155        | 1503.897        | 99.18              | 99.27                | n.a.           |
| 2                   |           | 15.197                | 12.060          | 11.001          | 0.82               | 0.73                 | n.a.           |
| <b>Total:</b>       |           |                       | <b>1464.215</b> | <b>1514.898</b> | <b>100.00</b>      | <b>100.00</b>        |                |

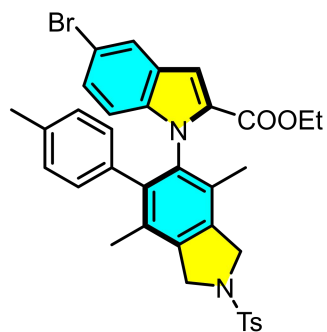

**3t**

White solid, 45.9 mg, 70% yield, 99% ee. [Chiral HPLC analysis of the product: Daicel Chiralpak OD-H 250X4.6 mm 5u column; *n*-hexane/2-propanol = 95/5, flow rate = 1.0 mL/min,  $\lambda$  = 254 nm, *t* (major) = 12.24 min, *t* (minor) = 15.22 min].  $[\alpha]_D^{20} = -67.0^\circ$  (*c* = 1.2,  $\text{CHCl}_3$ ).  $^1\text{H NMR}$  (500 MHz,  $\text{CDCl}_3$ )  $\delta$  7.84 (d, *J* = 8.3 Hz, 2H), 7.67 (d, *J* = 1.8 Hz, 1H), 7.38 (d, *J* = 8.0 Hz, 2H), 7.28 (dd, *J* = 8.8, 1.9 Hz, 1H), 6.99 (s, 1H), 6.90 (d, *J* = 9.8 Hz, 1H), 6.76 (dd, *J* = 17.7, 8.3 Hz, 2H), 6.65 (d, *J* = 9.6 Hz, 1H), 6.39 (d, *J* = 9.7 Hz, 1H), 4.68 (dd, *J* = 49.2, 12.1 Hz, 4H), 4.18 (ddd, *J* = 39.5, 10.8,

7.1 Hz, 2H), 2.46 (s, 3H), 2.15 (s, 3H), 1.89 (s, 3H), 1.70 (s, 3H), 1.24 (t,  $J = 7.1$  Hz, 3H).  $^{13}\text{C}$  NMR (126 MHz,  $\text{CDCl}_3$ )  $\delta$  160.99, 143.81, 141.01, 138.21, 136.60, 135.78, 135.50, 134.77, 133.89, 133.63, 129.97, 129.75, 129.59, 128.60, 128.35, 128.29, 128.13, 127.66, 127.51, 127.25, 124.67, 114.00, 112.96, 109.27, 53.97, 53.69, 26.93, 16.99, 14.23, 14.14, 14.09. HRMS (ESI,  $m/z$ ) Calcd for  $\text{C}_{35}\text{H}_{33}\text{BrN}_2\text{O}_4\text{S}$  ( $\text{M}+\text{H}$ ) $^+$ : 657.1417; Found: 657.1411.

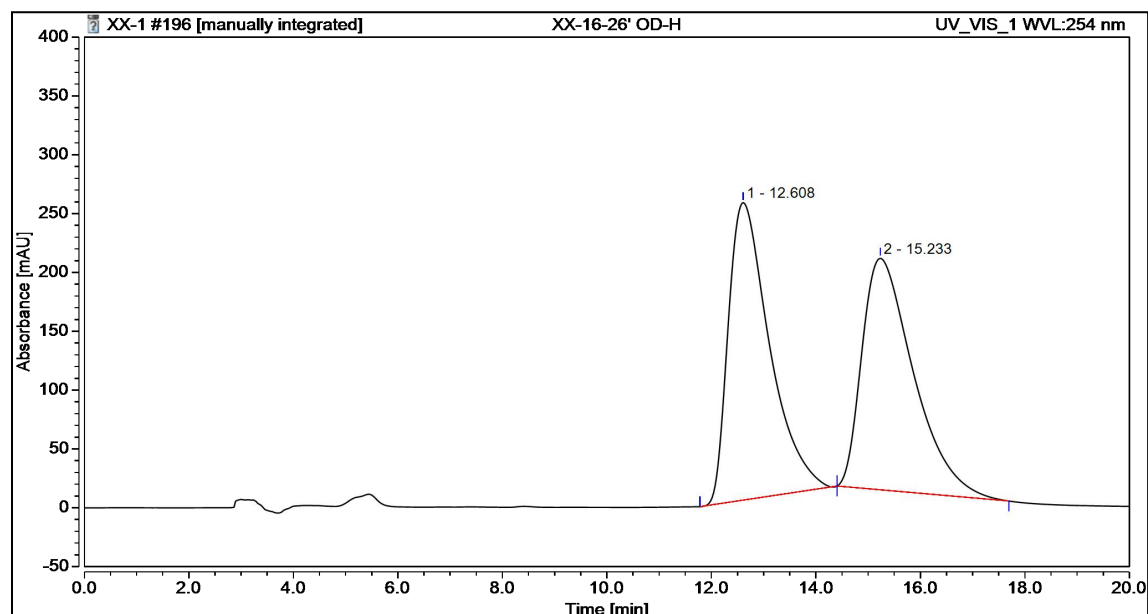

| Integration Results |           |                       |                 |               |                    |                      |        |
|---------------------|-----------|-----------------------|-----------------|---------------|--------------------|----------------------|--------|
| No.                 | Peak Name | Retention Time<br>min | Area<br>mAU*min | Height<br>mAU | Relative Area<br>% | Relative Height<br>% | Amount |
| 1                   |           | 12.608                | 231.054         | 252.939       | 50.68              | 56.25                | n.a.   |
| 2                   |           | 15.233                | 224.865         | 196.762       | 49.32              | 43.75                | n.a.   |
| Total:              |           |                       | 455.918         | 449.701       | 100.00             | 100.00               |        |

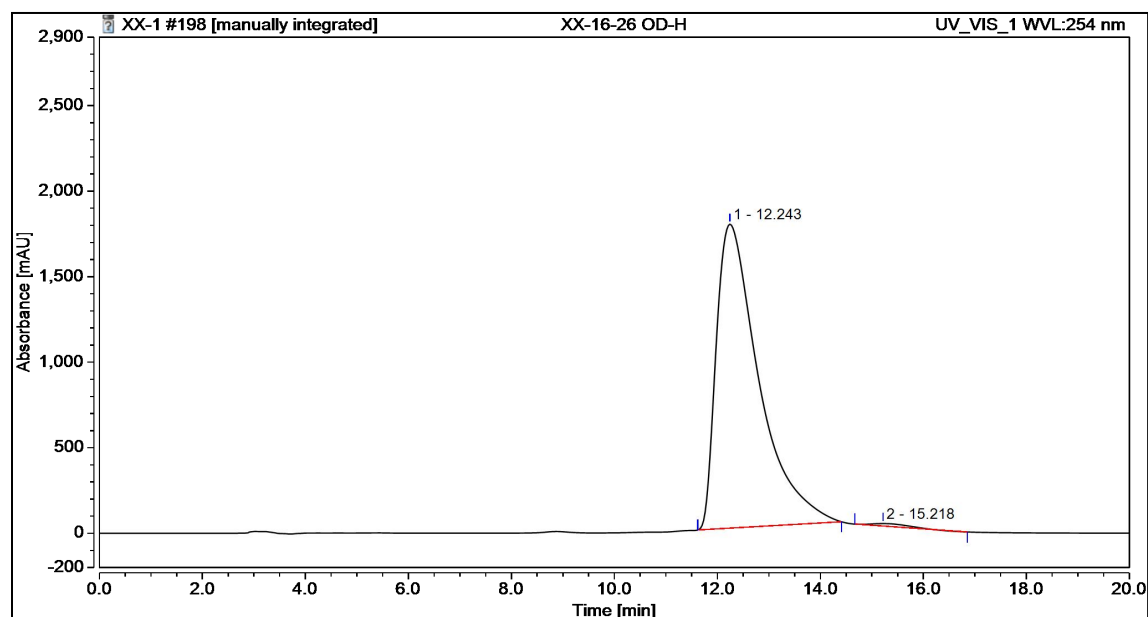

| Integration Results |           |                       |                 |                 |                    |                      |                |
|---------------------|-----------|-----------------------|-----------------|-----------------|--------------------|----------------------|----------------|
| No.                 | Peak Name | Retention Time<br>min | Area<br>mAU*min | Height<br>mAU   | Relative Area<br>% | Relative Height<br>% | Amount<br>n.a. |
| 1                   |           | 12.243                | 1697.168        | 1776.961        | 99.26              | 99.18                | n.a.           |
| 2                   |           | 15.218                | 12.680          | 14.760          | 0.74               | 0.82                 | n.a.           |
| <b>Total:</b>       |           |                       | <b>1709.848</b> | <b>1791.721</b> | <b>100.00</b>      | <b>100.00</b>        |                |

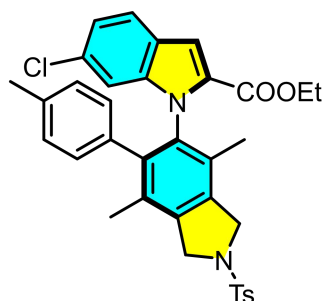

**3u**

White solid, 45.3 mg, 74% yield, 97% ee. [Chiral HPLC analysis of the product: Daicel Chiralpak OD-H 250X4.6 mm 5u column; *n*-hexane/2-propanol = 80/20, flow rate = 1.0 mL/min,  $\lambda = 254$  nm,  $t$  (major) = 5.71 min,  $t$  (minor) = 7.59 min].  $[\alpha]_D^{20} = -85.0^\circ$  ( $c = 2.0$ ,  $\text{CHCl}_3$ ).  **$^1\text{H NMR}$  (500 MHz,  $\text{CDCl}_3$ )**  $\delta$  7.85 (d,  $J = 8.2$  Hz, 2H), 7.44 (d,  $J = 8.5$  Hz, 1H), 7.39 (d,  $J = 8.0$  Hz, 2H), 7.04 (d,  $J = 6.9$  Hz, 2H), 6.90 (d,  $J = 9.8$  Hz, 1H), 6.84 (s, 1H), 6.78 (dd,  $J = 7.8, 1.9$  Hz, 1H), 6.66 (d,  $J = 7.8$  Hz, 1H), 6.43 (d,  $J = 9.7$  Hz, 1H), 4.78 – 4.63 (m, 4H), 4.18 (ddq,  $J = 40.8, 10.8, 7.1$  Hz, 2H), 2.46 (s, 3H), 2.15 (s, 3H), 1.90 (s, 3H), 1.73 (s, 3H), 1.23 (t,  $J = 7.1$  Hz, 3H).  **$^{13}\text{C NMR}$  (126 MHz,  $\text{CDCl}_3$ )**  $\delta$  161.03, 143.81, 140.98, 139.98, 136.56, 135.82, 135.45, 134.82, 133.90, 133.67, 131.26, 129.99, 129.61, 129.59, 128.64, 128.36, 128.27, 128.23, 127.65, 127.57, 124.27, 123.32, 121.87, 111.10, 110.14, 60.51, 53.99, 53.73, 21.59, 21.09, 16.98, 14.23. **HRMS (ESI,  $m/z$ )** Calcd for  $\text{C}_{35}\text{H}_{33}\text{ClN}_2\text{O}_4\text{S}$  ( $\text{M}+\text{H}$ ) $^+$ : 613.1922; Found: 613.1917.

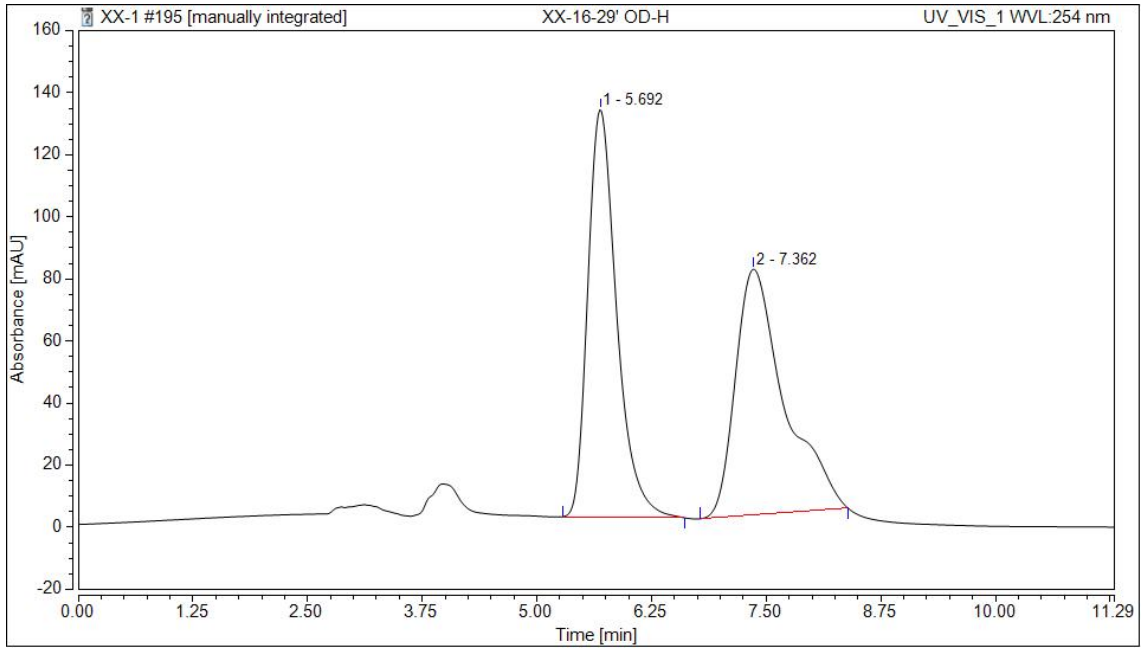

| Integration Results |           |                    |               |                |                 |                   |        |
|---------------------|-----------|--------------------|---------------|----------------|-----------------|-------------------|--------|
| No.                 | Peak Name | Retention Time min | Area mAU*min  | Height mAU     | Relative Area % | Relative Height % | Amount |
| 1                   |           | 5.692              | 47.820        | 131.332        | 49.51           | 62.39             | n.a.   |
| 2                   |           | 7.362              | 48.769        | 79.186         | 50.49           | 37.61             | n.a.   |
| <b>Total:</b>       |           |                    | <b>96.589</b> | <b>210.519</b> | <b>100.00</b>   | <b>100.00</b>     |        |

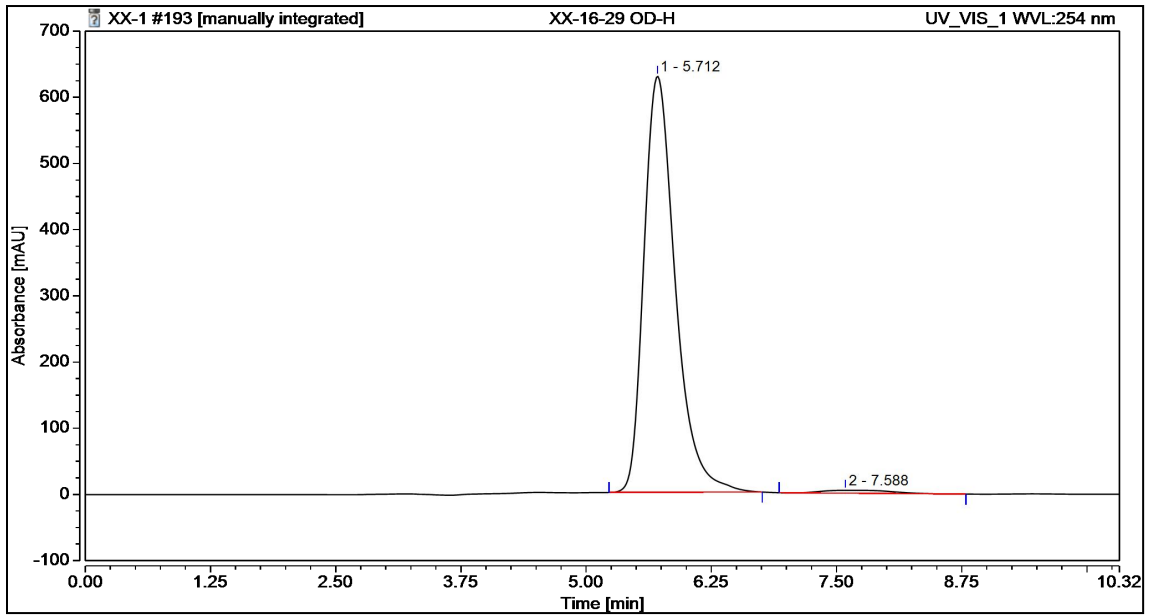

| Integration Results |           |                    |                |                |                 |                   |        |
|---------------------|-----------|--------------------|----------------|----------------|-----------------|-------------------|--------|
| No.                 | Peak Name | Retention Time min | Area mAU*min   | Height mAU     | Relative Area % | Relative Height % | Amount |
| 1                   |           | 5.712              | 228.421        | 628.851        | 98.43           | 99.30             | n.a.   |
| 2                   |           | 7.588              | 3.644          | 4.402          | 1.57            | 0.70              | n.a.   |
| <b>Total:</b>       |           |                    | <b>232.065</b> | <b>633.253</b> | <b>100.00</b>   | <b>100.00</b>     |        |

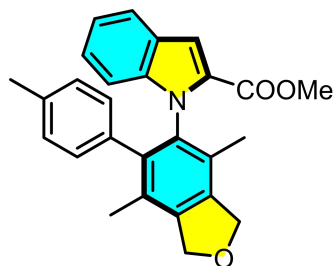

3v

White solid, 24.2 mg, 59% yield, 96% ee. [Chiral HPLC analysis of the product: Daicel Chiralpak OD-H 250X4.6 mm 5u column; *n*-hexane/2-propanol = 90/10, flow rate = 1.0 mL/min,  $\lambda = 254$  nm,  $t$  (major) = 4.55 min,  $t$  (minor) = 6.84 min].  $[\alpha]_D^{20} = -70.5^\circ$  ( $c = 1.0$ ,  $\text{CHCl}_3$ ).  $^1\text{H NMR}$  (500 MHz,  $\text{CDCl}_3$ )  $\delta$  7.56 (d,  $J = 8.0$  Hz, 1H), 7.24 (d,  $J = 9.5$  Hz, 1H), 7.13 – 7.07 (m, 2H), 6.96 – 6.91 (m, 2H), 6.88 (s, 1H), 6.62 (d,  $J = 7.8$  Hz, 1H), 6.48 (d,  $J = 9.7$  Hz, 1H), 5.23 (d,  $J = 2.5$  Hz, 4H), 3.76 (s, 3H), 2.15 (s, 3H), 1.93 (s, 3H), 1.75 (s, 3H).  $^{13}\text{C NMR}$  (126 MHz,  $\text{CDCl}_3$ )  $\delta$  161.78, 140.65, 139.94, 138.32, 137.54, 136.22, 135.50, 134.20, 128.90, 128.53, 128.12, 128.05, 127.95, 127.80, 127.10, 125.81, 125.16, 122.29, 120.74, 111.65, 110.21, 74.30, 74.02, 51.49, 21.09, 17.11, 14.26. HRMS (ESI,  $m/z$ ) Calcd for  $\text{C}_{27}\text{H}_{25}\text{NO}_3$  ( $\text{M}+\text{H}$ ) $^+$ : 412.1907; Found: 412.1919.

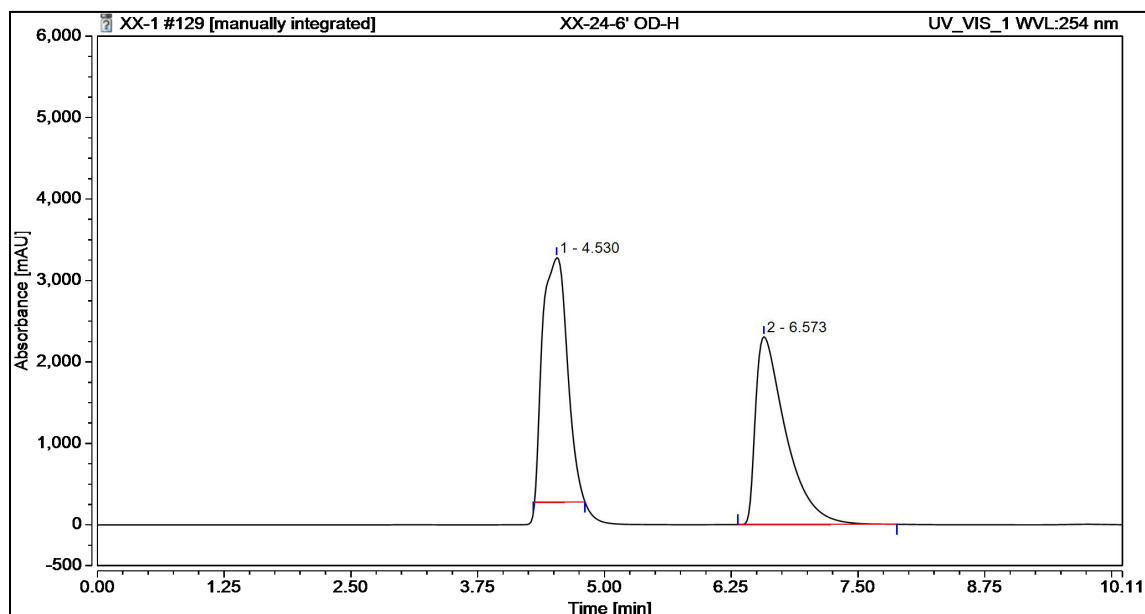

| Integration Results |           |                       |                 |                 |                    |                      |                |
|---------------------|-----------|-----------------------|-----------------|-----------------|--------------------|----------------------|----------------|
| No.                 | Peak Name | Retention Time<br>min | Area<br>mAU*min | Height<br>mAU   | Relative Area<br>% | Relative Height<br>% | Amount<br>n.a. |
| 1                   |           | 4.530                 | 838.889         | 3003.432        | 51.28              | 56.57                | n.a.           |
| 2                   |           | 6.573                 | 797.111         | 2305.770        | 48.72              | 43.43                | n.a.           |
| <b>Total:</b>       |           |                       | <b>1635.999</b> | <b>5309.202</b> | <b>100.00</b>      | <b>100.00</b>        |                |

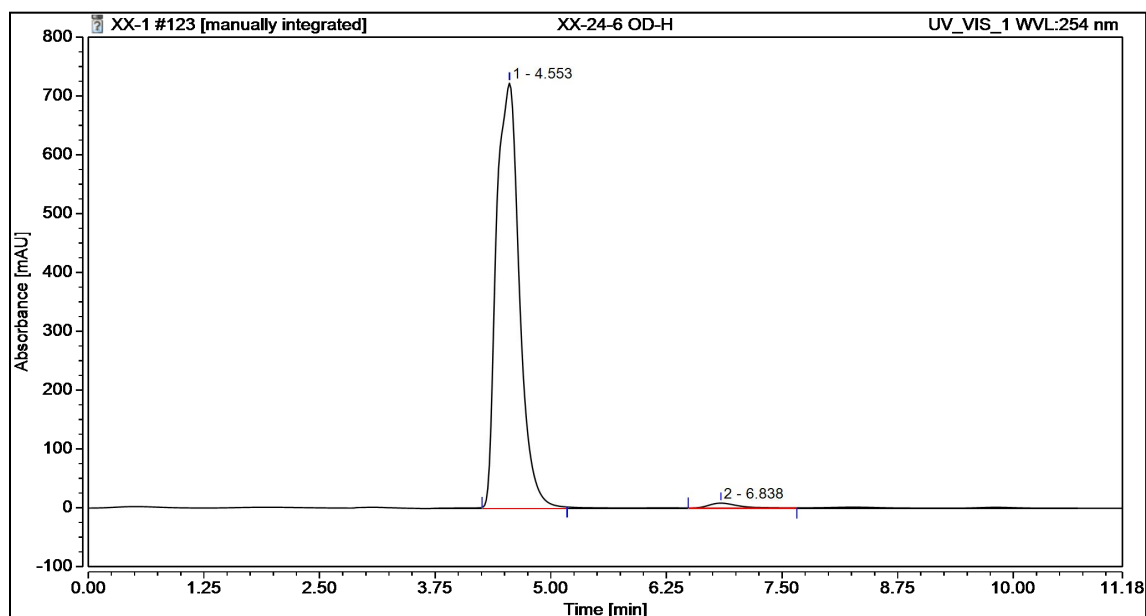

| Integration Results |           |                       |                 |               |                    |                      |                |
|---------------------|-----------|-----------------------|-----------------|---------------|--------------------|----------------------|----------------|
| No.                 | Peak Name | Retention Time<br>min | Area<br>mAU*min | Height<br>mAU | Relative Area<br>% | Relative Height<br>% | Amount<br>n.a. |
| 1                   |           | 4.553                 | 207.343         | 723.147       | 98.16              | 98.76                | n.a.           |
| 2                   |           | 6.838                 | 3.887           | 9.063         | 1.84               | 1.24                 | n.a.           |
| Total:              |           |                       | 211.230         | 732.210       | 100.00             | 100.00               |                |

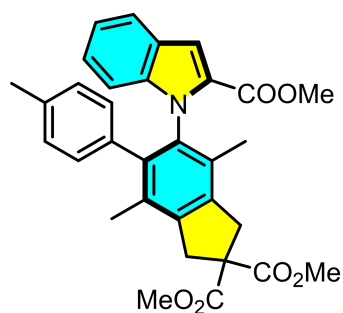

**3w**

White solid, 33.6 mg, 64% yield, 96% ee. [Chiral HPLC analysis of the product: Daicel Chiralpak OD-H 250X4.6 mm 5u column; *n*-hexane/2-propanol = 80/20, flow rate = 1.0 mL/min,  $\lambda$  = 254 nm,  $t$  (major) = 4.56 min,  $t$  (minor) = 6.90 min].  $[\alpha]_D^{20} = -38.5^\circ$  ( $c = 1.0$ ,  $\text{CHCl}_3$ ).  $^1\text{H NMR}$  (500 MHz,  $\text{CDCl}_3$ )  $\delta$  7.55 (d,  $J = 9.0$  Hz, 1H), 7.24 – 7.19 (m, 1H), 7.09 (d,  $J = 7.0$  Hz, 1H), 7.07 (s, 1H), 6.93 – 6.89 (m, 2H), 6.85 (d,  $J = 9.7$  Hz, 1H), 6.60 (d,  $J = 10.1$  Hz, 1H), 6.43 (d,  $J = 7.7$  Hz, 1H), 3.82 (s, 6H), 3.74 (s, 4H), 3.70 (s, 3H), 2.14 (s, 3H), 1.96 (s, 3H), 1.76 (s, 3H).  $^{13}\text{C NMR}$  (126 MHz,  $\text{CDCl}_3$ )  $\delta$  172.66, 172.18, 161.75, 140.07, 139.94, 138.99, 138.19, 135.98, 134.73, 130.16, 129.32, 128.96, 128.55, 128.00, 127.95, 127.78, 125.70, 125.03, 122.16,



120.62, 111.87, 110.05, 59.22, 53.15, 53.11, 51.46, 40.59, 26.93, 21.10, 17.27, 14.32.

HRMS (ESI, m/z) Calcd for C<sub>32</sub>H<sub>31</sub>NO<sub>6</sub> (M+H)<sup>+</sup>: 526.2224; Found: 526.2237.

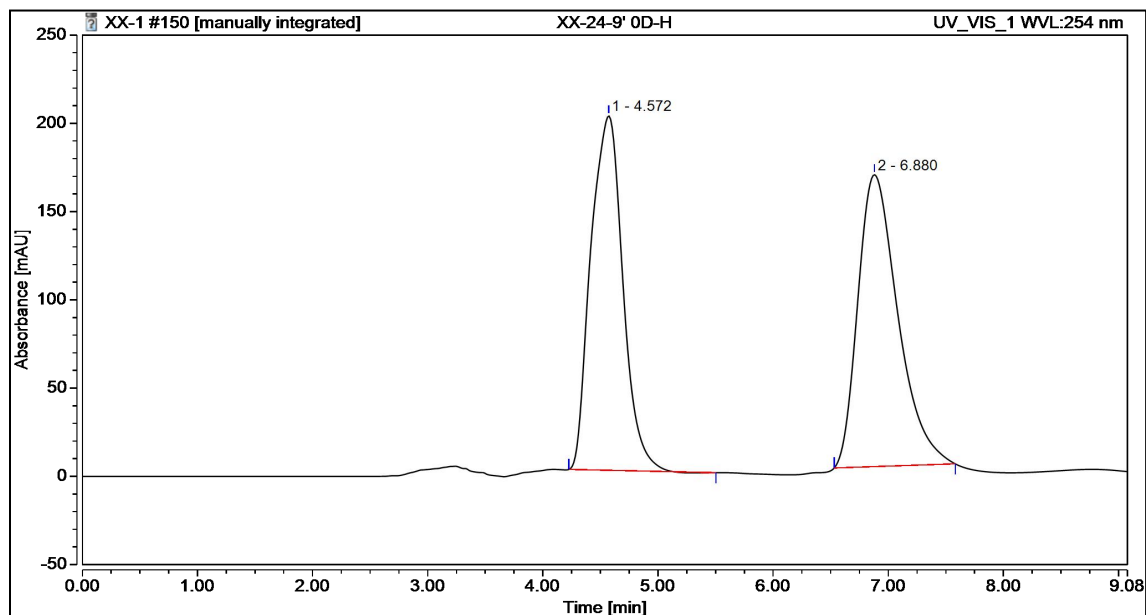

| Integration Results |           |                       |                 |                |                    |                      |                |
|---------------------|-----------|-----------------------|-----------------|----------------|--------------------|----------------------|----------------|
| No.                 | Peak Name | Retention Time<br>min | Area<br>mAU*min | Height<br>mAU  | Relative Area<br>% | Relative Height<br>% | Amount<br>n.a. |
| 1                   |           | 4.572                 | 64.677          | 200.846        | 49.33              | 54.84                | n.a.           |
| 2                   |           | 6.880                 | 66.444          | 165.412        | 50.67              | 45.16                | n.a.           |
| <b>Total:</b>       |           |                       | <b>131.121</b>  | <b>366.259</b> | <b>100.00</b>      | <b>100.00</b>        |                |

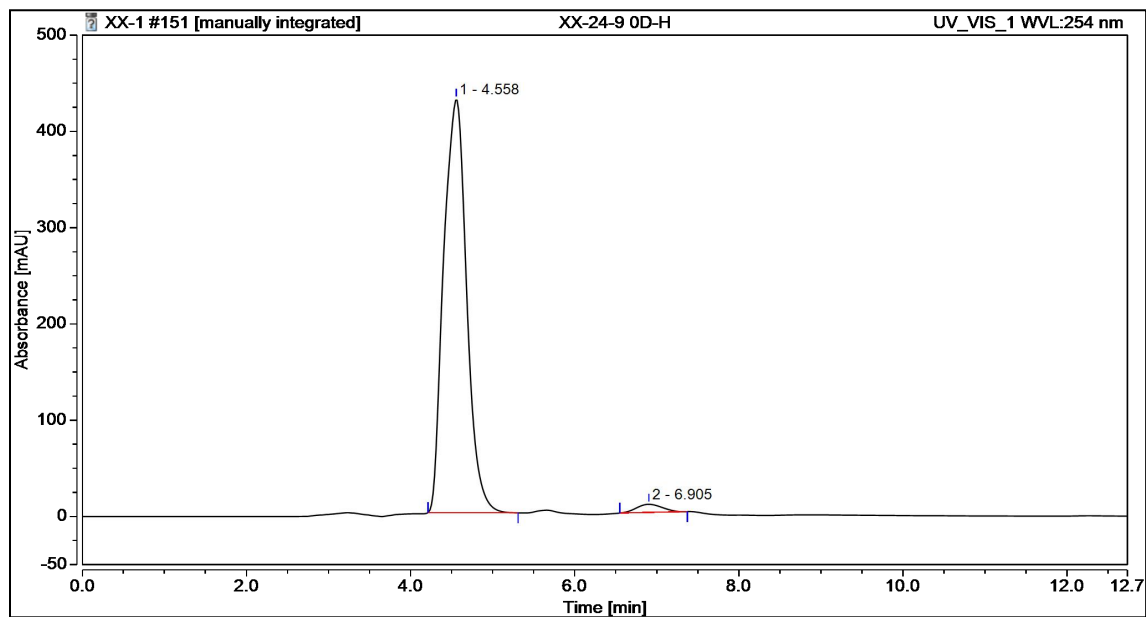

| Integration Results |           |                       |                 |                |                    |                      |                |
|---------------------|-----------|-----------------------|-----------------|----------------|--------------------|----------------------|----------------|
| No.                 | Peak Name | Retention Time<br>min | Area<br>mAU*min | Height<br>mAU  | Relative Area<br>% | Relative Height<br>% | Amount<br>n.a. |
| 1                   |           | 4.558                 | 139.099         | 429.708        | 97.85              | 98.06                | n.a.           |
| 2                   |           | 6.905                 | 3.058           | 8.481          | 2.15               | 1.94                 | n.a.           |
| <b>Total:</b>       |           |                       | <b>142.157</b>  | <b>438.188</b> | <b>100.00</b>      | <b>100.00</b>        |                |

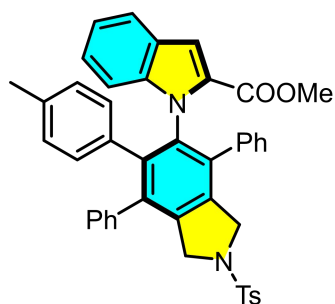

**3x**

White solid, 23.4 mg, 34% yield, 75% ee. [Chiral HPLC analysis of the product: Phenomenex 00G-4457-E0 250X4.6 mm 5u column; *n*-hexane/2-propanol = 98/2, flow rate = 1.0 mL/min,  $\lambda$  = 254 nm,  $t$  (major) = 84.07 min,  $t$  (minor) = 105.35 min].  $[\alpha]_D^{20}$  = - 19.3° ( $c$  = 0.2,  $\text{CHCl}_3$ ).  $^1\text{H NMR}$  (500 MHz,  $\text{CDCl}_3$ )  $\delta$  7.70 (d,  $J$  = 8.3 Hz, 2H), 7.35 (dd,  $J$  = 11.3, 7.9 Hz, 3H), 7.20 – 7.13 (m, 4H), 7.10 – 6.88 (m, 9H), 6.81 (s, 1H), 6.74 – 6.31 (m, 4H), 4.63 – 4.44 (m, 4H), 3.71 (s, 3H), 2.46 (s, 3H), 1.98 (s, 3H).  $^{13}\text{C NMR}$  (126 MHz,  $\text{CDCl}_3$ )  $\delta$  162.06, 143.74, 140.68, 140.06, 138.13, 137.08, 135.90, 135.78, 135.77, 135.55, 135.41, 135.19, 133.70, 133.15, 129.91, 129.29, 129.07, 128.02, 127.91, 127.81, 127.64, 127.62, 127.52, 127.01, 125.46, 124.91, 122.08, 120.63, 111.86, 110.37, 54.26, 53.92, 51.45, 21.57, 20.99. HRMS (ESI,  $m/z$ ) Calcd for  $\text{C}_{44}\text{H}_{36}\text{N}_2\text{O}_4\text{S}$  ( $\text{M}+\text{H}$ ) $^+$ : 689.2469; Found: 689.2451.

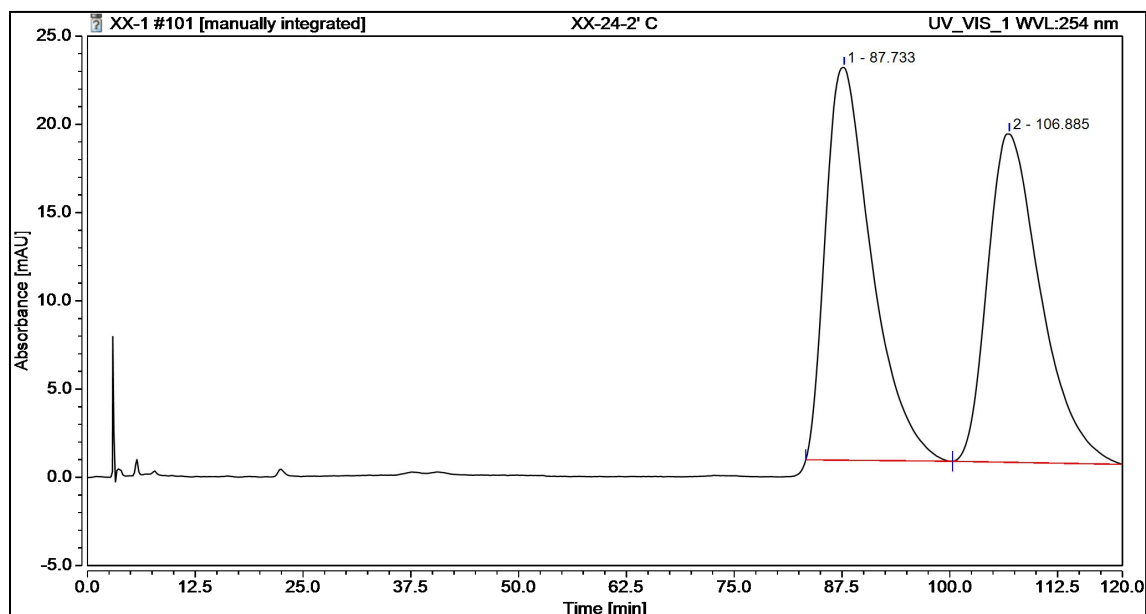

| Integration Results |           |                       |                 |               |                    |                      |                |
|---------------------|-----------|-----------------------|-----------------|---------------|--------------------|----------------------|----------------|
| No.                 | Peak Name | Retention Time<br>min | Area<br>mAU*min | Height<br>mAU | Relative Area<br>% | Relative Height<br>% | Amount<br>n.a. |
| 1                   |           | 87.733                | 138.217         | 22.259        | 50.98              | 54.46                | n.a.           |
| 2                   |           | 106.885               | 132.907         | 18.615        | 49.02              | 45.54                | n.a.           |
| <b>Total:</b>       |           |                       | <b>271.124</b>  | <b>40.874</b> | <b>100.00</b>      | <b>100.00</b>        |                |

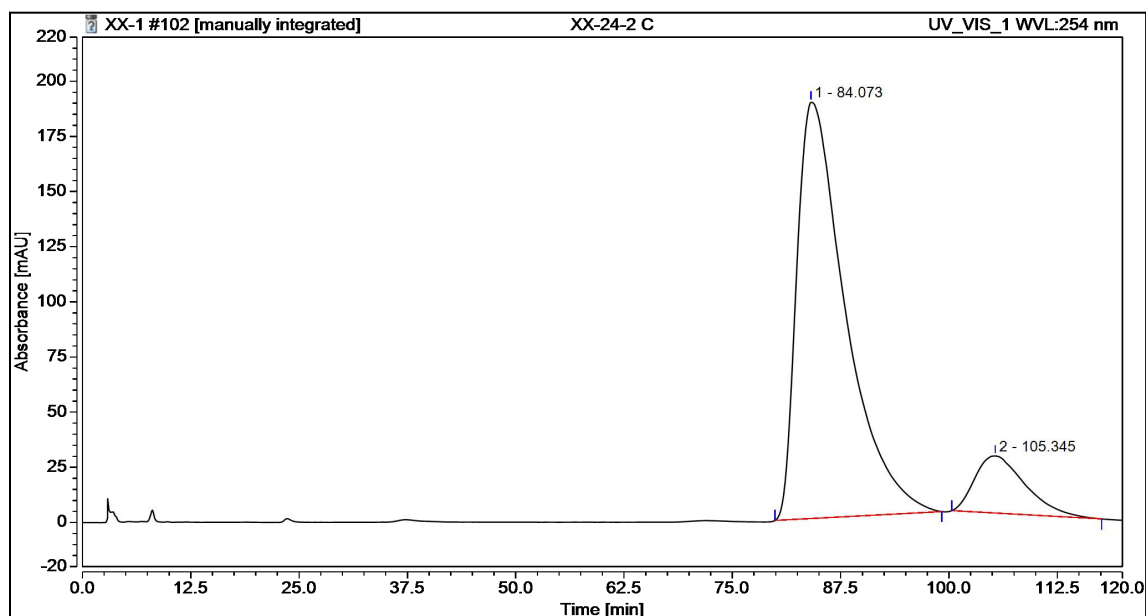

| Integration Results |           |                       |                 |                |                    |                      |                |
|---------------------|-----------|-----------------------|-----------------|----------------|--------------------|----------------------|----------------|
| No.                 | Peak Name | Retention Time<br>min | Area<br>mAU*min | Height<br>mAU  | Relative Area<br>% | Relative Height<br>% | Amount<br>n.a. |
| 1                   |           | 84.073                | 1228.178        | 188.774        | 87.55              | 87.93                | n.a.           |
| 2                   |           | 105.345               | 174.701         | 25.920         | 12.45              | 12.07                | n.a.           |
| <b>Total:</b>       |           |                       | <b>1402.879</b> | <b>214.694</b> | <b>100.00</b>      | <b>100.00</b>        |                |

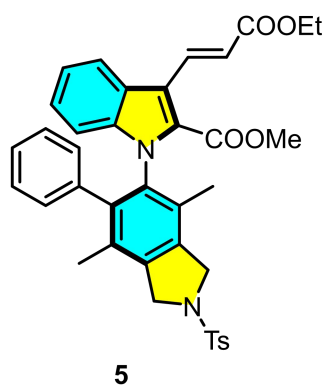

White solid, 51.7 mg, 40% yield, 97% ee. [Chiral HPLC analysis of the product: Phenomenex 00G-4457-E0 250X4.6 mm 5u column; *n*-hexane/2-propanol = 50/50, flow rate = 1.0 mL/min,  $\lambda = 254$  nm,  $t$  (major) = 22.51 min,  $t$  (minor) = 15.78 min].  $[\alpha]_D^{20} = 29.8^\circ$  ( $c = 2.1$ ,  $\text{CHCl}_3$ ).  $^1\text{H NMR}$  (500 MHz,  $\text{CDCl}_3$ )  $\delta$  8.27 (d,  $J = 16.3$  Hz, 1H), 7.87 (dd,  $J = 15.5, 8.3$  Hz, 3H), 7.39 (d,  $J = 8.0$  Hz, 2H), 7.29 (t,  $J = 7.7$  Hz, 1H), 7.21 (t,  $J = 7.1$  Hz, 1H), 7.12 (t,  $J = 7.6$  Hz, 1H), 7.01 (t,  $J = 6.8$  Hz, 1H), 6.88 (d,  $J = 7.7$  Hz, 2H), 6.77 (t,  $J = 8.3$  Hz, 1H), 6.51 (d,  $J = 16.2$  Hz, 1H), 6.41 (d,  $J = 7.8$  Hz, 1H), 4.80 – 4.60 (m, 4H), 4.26 (qd,  $J = 7.2, 2.0$  Hz, 2H), 3.81 (s, 3H), 2.47 (s, 3H), 1.92 (s, 3H), 1.78 (s, 3H), 1.33 (t,  $J = 7.1$  Hz, 3H).  $^{13}\text{C NMR}$  (126 MHz,  $\text{CDCl}_3$ )  $\delta$

167.61, 161.69, 143.86, 140.47, 139.41, 137.70, 136.35, 135.92, 135.66, 135.05, 133.92, 130.00, 129.50, 128.76, 128.73, 128.32, 127.68, 127.60, 127.58, 127.51, 127.48, 127.31, 126.05, 124.26, 122.46, 122.00, 119.09, 117.62, 112.00, 60.35, 53.94, 53.69, 52.13, 21.59, 17.00, 14.39, 14.33. **HRMS (ESI, m/z)** Calcd for C<sub>38</sub>H<sub>36</sub>N<sub>2</sub>O<sub>6</sub>S (M+NH<sub>4</sub>)<sup>+</sup>: 666.2632; Found: 666.2634.

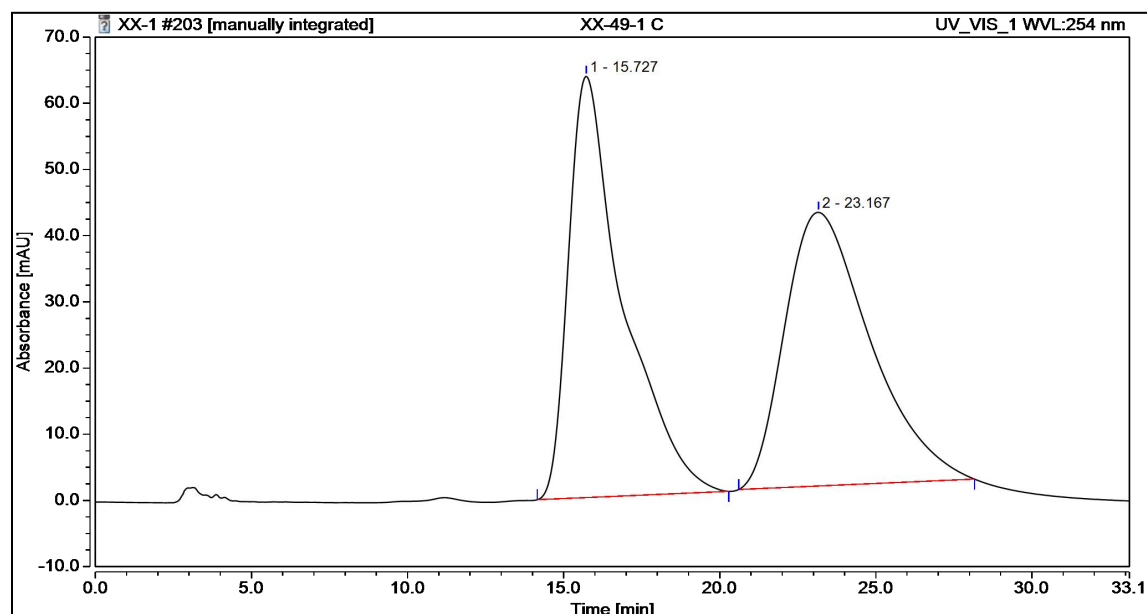

| Integration Results |           |                    |                |                |                 |                   |        |
|---------------------|-----------|--------------------|----------------|----------------|-----------------|-------------------|--------|
| No.                 | Peak Name | Retention Time min | Area mAU*min   | Height mAU     | Relative Area % | Relative Height % | Amount |
| 1                   |           | 15.727             | 127.878        | 63.665         | 49.36           | 60.62             | n.a.   |
| 2                   |           | 23.167             | 131.175        | 41.357         | 50.64           | 39.38             | n.a.   |
| <b>Total:</b>       |           |                    | <b>259.053</b> | <b>105.023</b> | <b>100.00</b>   | <b>100.00</b>     |        |

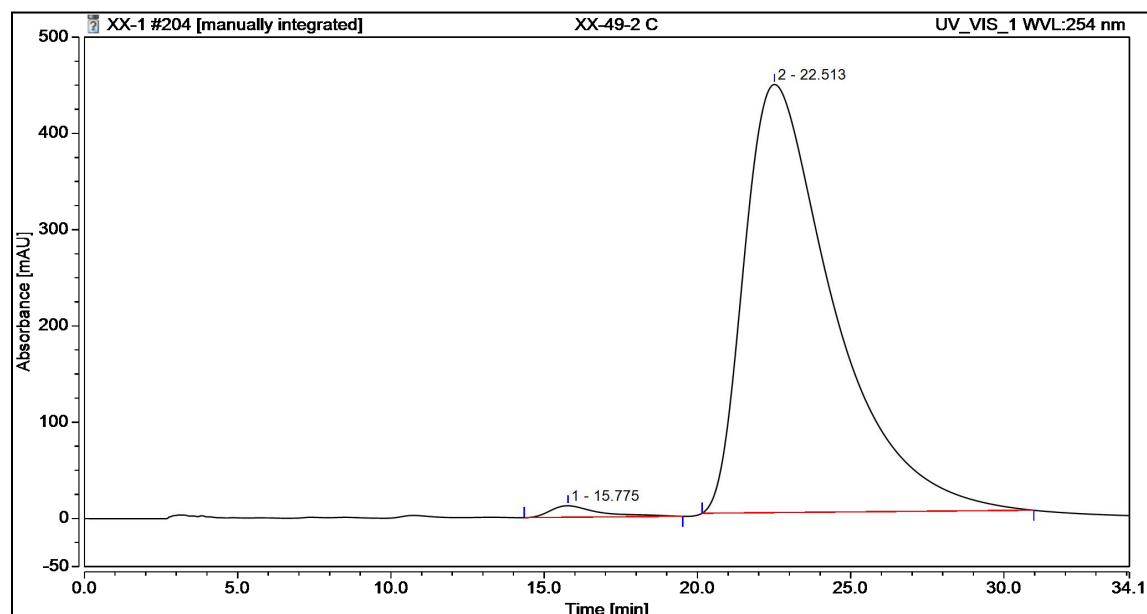

| Integration Results |           |                       |                 |                |                    |                      |                |
|---------------------|-----------|-----------------------|-----------------|----------------|--------------------|----------------------|----------------|
| No.                 | Peak Name | Retention Time<br>min | Area<br>mAU*min | Height<br>mAU  | Relative Area<br>% | Relative Height<br>% | Amount<br>n.a. |
| 1                   |           | 15.775                | 22.186          | 12.017         | 1.45               | 2.63                 | n.a.           |
| 2                   |           | 22.513                | 1504.512        | 444.814        | 98.55              | 97.37                | n.a.           |
| <b>Total:</b>       |           |                       | <b>1526.698</b> | <b>456.830</b> | <b>100.00</b>      | <b>100.00</b>        |                |

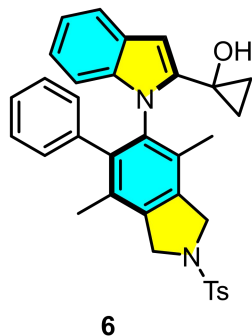

White solid, 32.8 mg, 60% yield, 99% ee. [Chiral HPLC analysis of the product: Daicel Chiralpak OD-H 250X4.6 mm 5u column; *n*-hexane/2-propanol = 90/10, flow rate = 1.0 mL/min,  $\lambda$  = 254 nm, *t* (major) = 20.43 min, *t* (minor) = 24.42 min].  $[\alpha]_D^{20} = -79.4^\circ$  (*c* = 0.4, CHCl<sub>3</sub>). **<sup>1</sup>H NMR (500 MHz, CDCl<sub>3</sub>)**  $\delta$  7.85 (d, *J* = 8.2 Hz, 2H), 7.47 (d, *J* = 7.7 Hz, 1H), 7.39 (d, *J* = 8.0 Hz, 2H), 7.23 (t, *J* = 8.5 Hz, 2H), 7.15 – 7.02 (m, 3H), 6.86 (t, *J* = 7.7 Hz, 1H), 6.79 (d, *J* = 8.0 Hz, 1H), 6.69 (d, *J* = 7.8 Hz, 1H), 6.20 (s, 1H), 4.69 (dd, *J* = 28.2, 2.5 Hz, 4H), 2.46 (s, 3H), 2.02 (s, 3H), 1.60 (s, 3H), 0.92 – 0.83 (m, 2H), 0.83 – 0.74 (m, 2H). **<sup>13</sup>C NMR (126 MHz, CDCl<sub>3</sub>)**  $\delta$  143.83, 141.53, 141.33, 139.71, 136.86, 136.36, 135.76, 135.29, 133.97, 130.18, 129.99, 129.62, 128.60, 128.02, 127.67, 127.34, 127.22, 126.80, 122.15, 120.56, 119.96, 110.37, 100.54, 54.04, 53.68, 51.58, 21.60, 17.57, 16.41, 14.83, 14.31. **HRMS (ESI, *m/z*)** Calcd for C<sub>34</sub>H<sub>32</sub>N<sub>2</sub>O<sub>3</sub>S (M+H)<sup>+</sup>: 549.2206; Found: 549.2218.

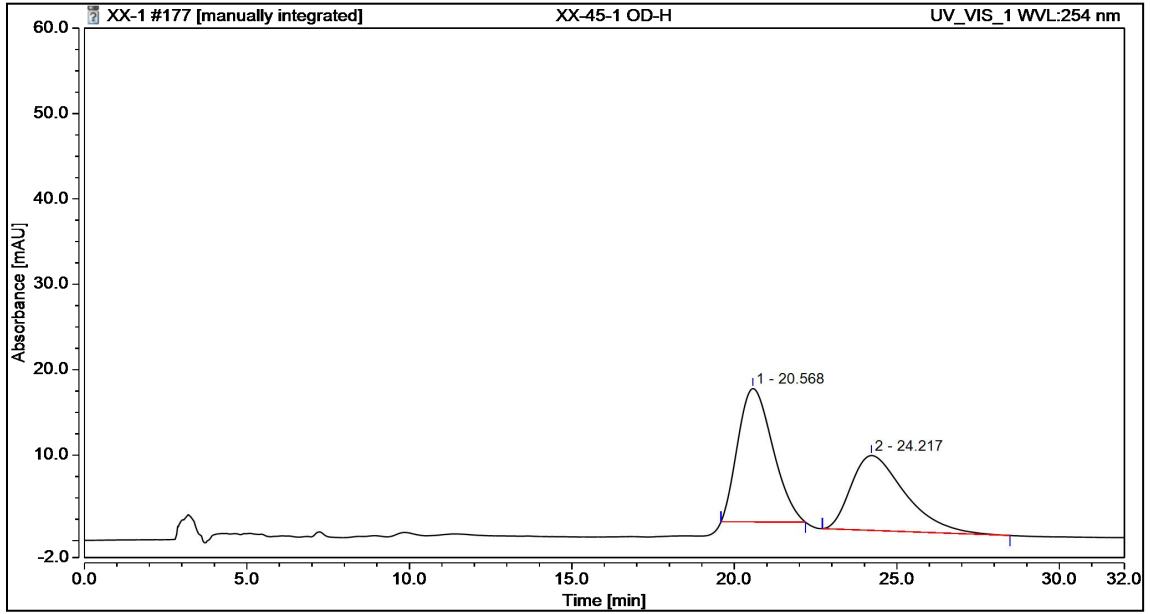

| Integration Results |           |                       |                 |               |                    |                      |                |
|---------------------|-----------|-----------------------|-----------------|---------------|--------------------|----------------------|----------------|
| No.                 | Peak Name | Retention Time<br>min | Area<br>mAU*min | Height<br>mAU | Relative Area<br>% | Relative Height<br>% | Amount<br>n.a. |
| 1                   |           | 20.568                | 19.500          | 15.622        | 53.53              | 64.04                | n.a.           |
| 2                   |           | 24.217                | 16.928          | 8.771         | 46.47              | 35.96                | n.a.           |
| <b>Total:</b>       |           |                       | <b>36.428</b>   | <b>24.393</b> | <b>100.00</b>      | <b>100.00</b>        |                |

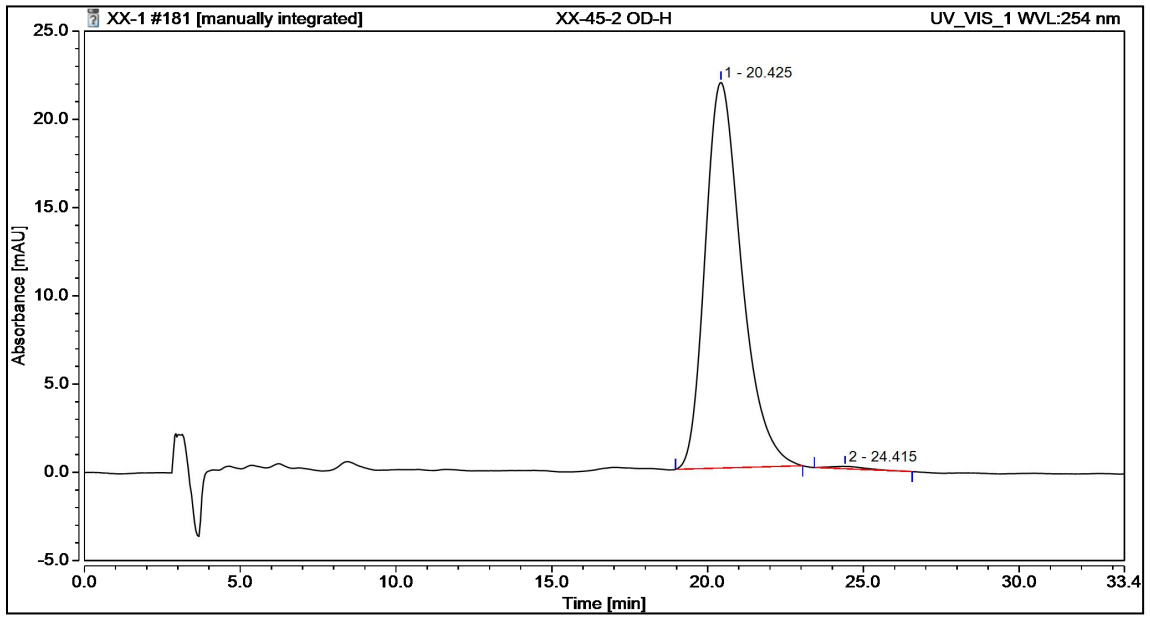

| Integration Results |           |                       |                 |               |                    |                      |                |
|---------------------|-----------|-----------------------|-----------------|---------------|--------------------|----------------------|----------------|
| No.                 | Peak Name | Retention Time<br>min | Area<br>mAU*min | Height<br>mAU | Relative Area<br>% | Relative Height<br>% | Amount<br>n.a. |
| 1                   |           | 20.425                | 29.670          | 21.870        | 99.37              | 99.35                | n.a.           |
| 2                   |           | 24.415                | 0.189           | 0.144         | 0.63               | 0.65                 | n.a.           |
| <b>Total:</b>       |           |                       | <b>29.859</b>   | <b>22.014</b> | <b>100.00</b>      | <b>100.00</b>        |                |

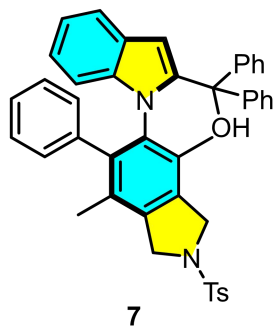

White solid, 51.2 mg, 76% yield, 97% ee. [Chiral HPLC analysis of the product: Phenomenex 00G-4457-E0 250X4.6 mm 5u column; *n*-hexane/2-propanol = 80/20, flow rate = 1.0 mL/min,  $\lambda = 254$  nm,  $t$  (major) = 18.60 min,  $t$  (minor) = 11.46 min].  $[\alpha]_D^{20} = -80.6^\circ$  ( $c = 1.5$ ,  $\text{CHCl}_3$ ).  **$^1\text{H}$  NMR (500 MHz,  $\text{CDCl}_3$ )**  $\delta$  7.83 (d,  $J = 8.3$  Hz, 2H), 7.40 (t,  $J = 8.6$  Hz, 3H), 7.30 – 7.12 (m, 12H), 7.11 – 7.03 (m, 2H), 6.83 – 6.79 (m, 1H), 6.79 – 6.75 (m, 2H), 6.67 (d,  $J = 8.0$  Hz, 1H), 6.46 (d,  $J = 7.8$  Hz, 1H), 5.79 (s, 1H), 4.77 – 4.60 (m, 2H), 4.48 (s, 2H), 2.46 (s, 3H), 1.94 (s, 3H), 0.96 (s, 3H).  **$^{13}\text{C}$  NMR (126 MHz,  $\text{CDCl}_3$ )**  $\delta$  146.51, 143.92, 143.82, 143.57, 141.96, 140.44, 137.26, 136.26, 135.88, 135.02, 134.01, 130.38, 130.06, 129.97, 129.35, 128.09, 127.83, 127.74, 127.69, 127.67, 127.62, 127.46, 127.33, 127.25, 127.12, 126.21, 122.24, 120.59, 119.97, 110.72, 106.35, 80.02, 54.04, 53.64, 21.60, 17.46, 13.54. **HRMS (ESI,  $m/z$ )** Calcd for  $\text{C}_{44}\text{H}_{38}\text{N}_2\text{O}_3\text{S}$  ( $\text{M}+\text{H}$ ) $^+$ : 675.2676; Found: 675.6766.

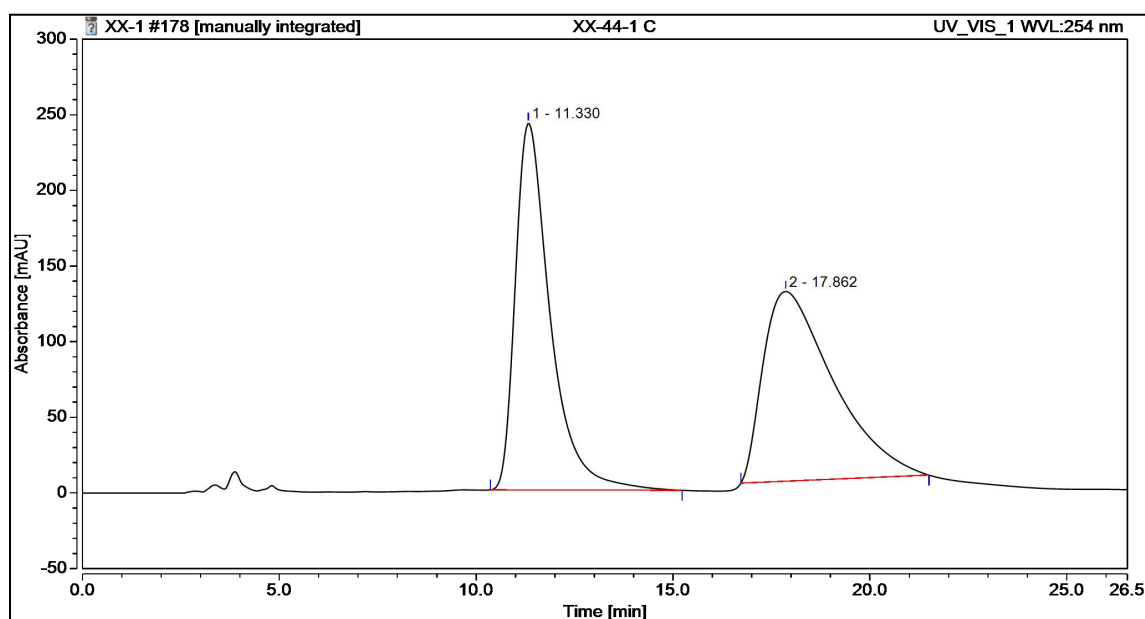

| Integration Results |           |                       |                 |               |                    |                      |                |
|---------------------|-----------|-----------------------|-----------------|---------------|--------------------|----------------------|----------------|
| No.                 | Peak Name | Retention Time<br>min | Area<br>mAU*min | Height<br>mAU | Relative Area<br>% | Relative Height<br>% | Amount<br>n.a. |
| 1                   |           | 11.330                | 248.926         | 242.461       | 49.06              | 65.90                | n.a.           |
| 2                   |           | 17.862                | 258.515         | 125.455       | 50.94              | 34.10                | n.a.           |
| Total:              |           |                       | 507.441         | 367.916       | 100.00             | 100.00               |                |

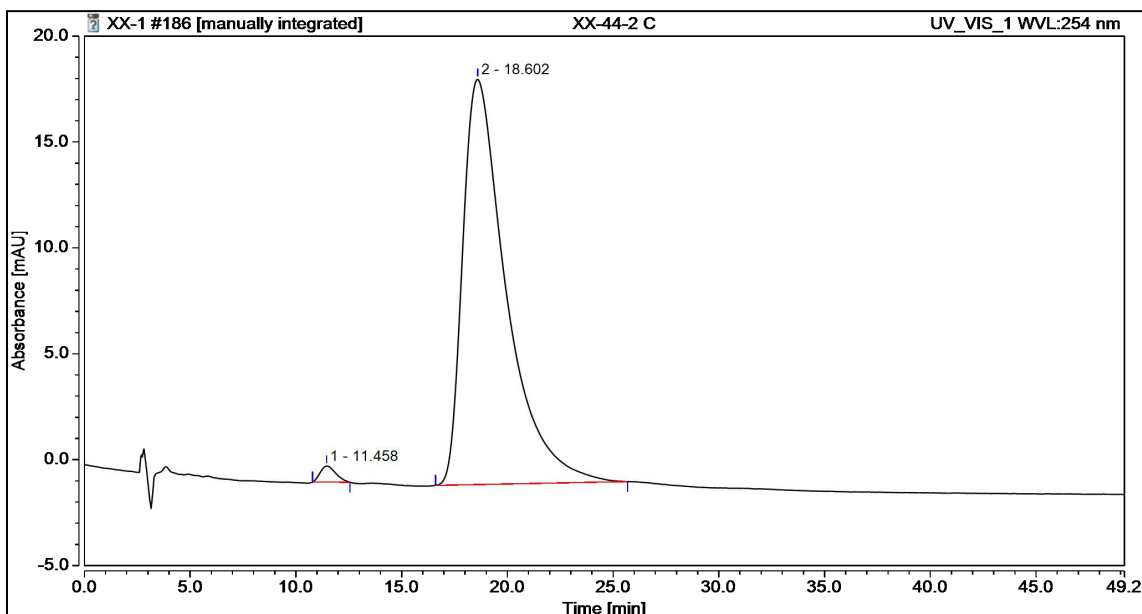

| Integration Results |           |                       |                 |               |                    |                      |                |
|---------------------|-----------|-----------------------|-----------------|---------------|--------------------|----------------------|----------------|
| No.                 | Peak Name | Retention Time<br>min | Area<br>mAU*min | Height<br>mAU | Relative Area<br>% | Relative Height<br>% | Amount<br>n.a. |
| 1                   |           | 11.458                | 0.648           | 0.767         | 1.40               | 3.85                 | n.a.           |
| 2                   |           | 18.602                | 45.649          | 19.148        | 98.60              | 96.15                | n.a.           |
| Total:              |           |                       | 46.298          | 19.915        | 100.00             | 100.00               |                |

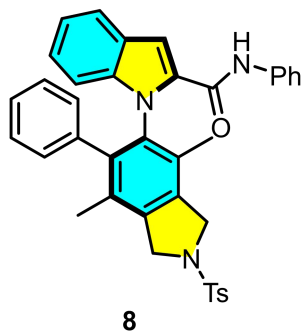

White solid, 53.1 mg, 87% yield, 99% ee. [Chiral HPLC analysis of the product: Daicel Chiralpak OD-H 250X4.6 mm 5u column; *n*-hexane/2-propanol = 80/20, flow rate = 1.0 mL/min,  $\lambda$  = 254 nm,  $t$  (major) = 10.09 min,  $t$  (minor) = 14.58 min].  $[\alpha]_D^{20}$  = -18.8° ( $c$  = 1.2,  $\text{CHCl}_3$ ).  $^1\text{H NMR}$  (500 MHz,  $\text{CDCl}_3$ )  $\delta$  7.84 (d,  $J$  = 8.2 Hz, 2H), 7.55 (d,  $J$  = 7.9 Hz, 1H), 7.44 – 7.35 (m, 4H), 7.31 (d,  $J$  = 7.8 Hz, 2H), 7.25 (d,  $J$  = 5.8 Hz, 2H), 7.16 – 7.02 (m, 4H), 6.99 (d,  $J$  = 7.1 Hz, 1H), 6.91 (d,  $J$  = 8.3 Hz, 1H), 6.81 – 6.76 (m, 1H), 6.75 (s, 1H), 6.38 (d,  $J$  = 7.3 Hz, 1H), 4.82 – 4.56 (m, 4H), 2.47 (s, 3H),



1.89 (s, 3H), 1.86 (s, 3H). <sup>13</sup>C NMR (126 MHz, CDCl<sub>3</sub>) δ 159.50, 143.85, 140.43, 139.52, 137.56, 136.99, 135.70, 135.57, 135.01, 133.80, 133.04, 130.02, 129.74, 129.20, 129.06, 128.74, 127.66, 127.59, 127.46, 127.26, 126.92, 125.92, 124.93, 124.36, 121.88, 121.08, 119.88, 111.39, 104.69, 54.02, 53.83, 21.59, 16.97, 14.55.

HRMS (ESI, m/z) Calcd for C<sub>38</sub>H<sub>33</sub>N<sub>3</sub>O<sub>3</sub>S (M+H)<sup>+</sup>: 612.2315; Found: 612.2303.

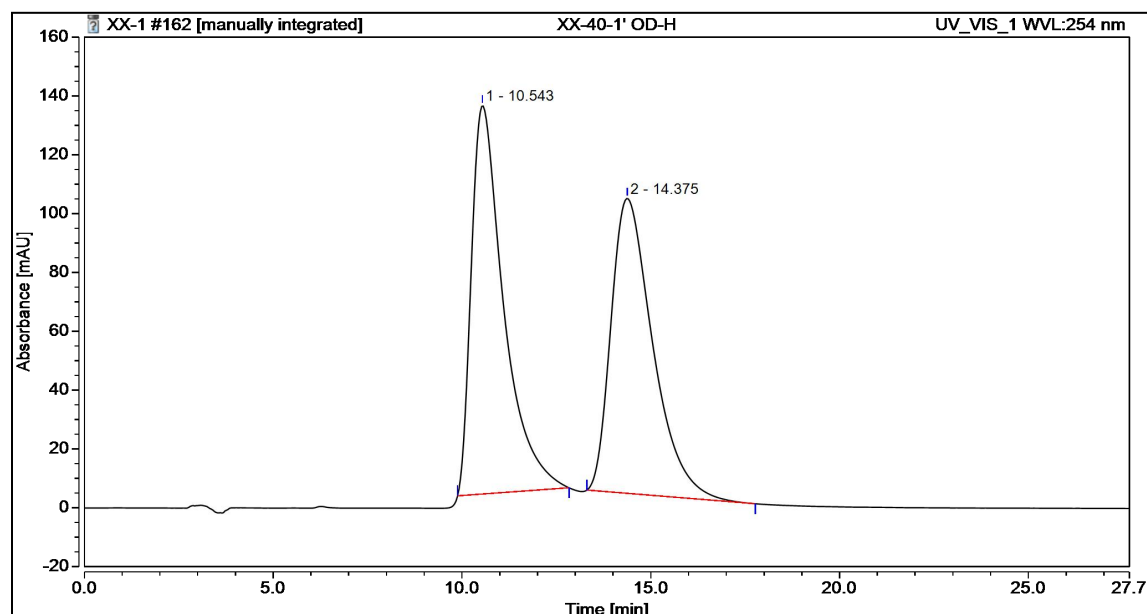

| Integration Results |           |                       |                 |               |                    |                      |                |
|---------------------|-----------|-----------------------|-----------------|---------------|--------------------|----------------------|----------------|
| No.                 | Peak Name | Retention Time<br>min | Area<br>mAU*min | Height<br>mAU | Relative Area<br>% | Relative Height<br>% | Amount<br>n.a. |
| 1                   |           | 10.543                | 130.877         | 132.080       | 50.49              | 56.84                | n.a.           |
| 2                   |           | 14.375                | 128.356         | 100.276       | 49.51              | 43.16                | n.a.           |
| Total:              |           |                       | 259.233         | 232.356       | 100.00             | 100.00               |                |

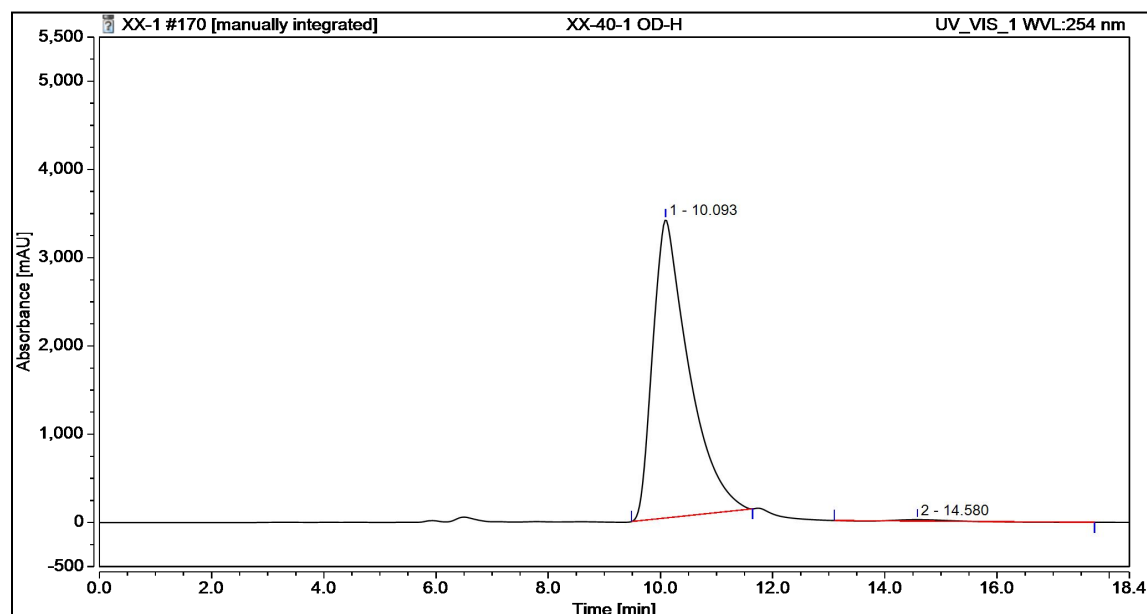

| Integration Results |           |                       |                 |                 |                    |                      |                |
|---------------------|-----------|-----------------------|-----------------|-----------------|--------------------|----------------------|----------------|
| No.                 | Peak Name | Retention Time<br>min | Area<br>mAU*min | Height<br>mAU   | Relative Area<br>% | Relative Height<br>% | Amount<br>n.a. |
| 1                   |           | 10.093                | 2512.703        | 3380.588        | 99.62              | 99.52                | n.a.           |
| 2                   |           | 14.580                | 9.499           | 16.271          | 0.38               | 0.48                 | n.a.           |
| <b>Total:</b>       |           |                       | <b>2522.202</b> | <b>3396.859</b> | <b>100.00</b>      | <b>100.00</b>        |                |

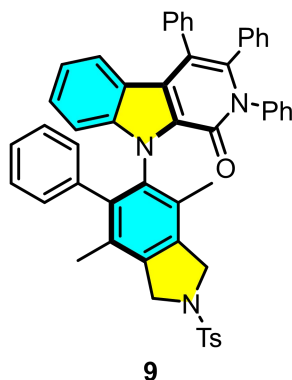

White solid, 51.1 mg, 65% yield, 99% ee. [Chiral HPLC analysis of the product: Phenomenex 00G-4457-E0 250X4.6 mm 5u column; *n*-hexane/2-propanol = 80/20, flow rate = 1.0 mL/min,  $\lambda$  = 254 nm,  $t$  (major) = 42.79 min,  $t$  (minor) = 34.06 min].  $[\alpha]_D^{20}$  = 112.6° ( $c$  = 1.6, CHCl<sub>3</sub>). **<sup>1</sup>H NMR (500 MHz, CDCl<sub>3</sub>)**  $\delta$  7.81 (d,  $J$  = 8.3 Hz, 2H), 7.35 (d,  $J$  = 8.0 Hz, 2H), 7.29 (t,  $J$  = 8.3 Hz, 1H), 7.23 – 6.96 (m, 14H), 6.87 (dd,  $J$  = 7.3, 2.8 Hz, 5H), 6.77 (t,  $J$  = 7.5 Hz, 2H), 6.58 (d,  $J$  = 8.1 Hz, 1H), 6.42 (d,  $J$  = 7.8 Hz, 1H), 4.87 – 4.44 (m, 4H), 2.42 (s, 3H), 1.99 (s, 3H), 1.88 (s, 3H). **<sup>13</sup>C NMR (126 MHz, CDCl<sub>3</sub>)**  $\delta$  155.57, 143.83, 142.05, 141.25, 139.45, 137.63, 137.13, 136.96, 135.80, 135.32, 134.63, 134.56, 133.54, 131.56, 131.44, 131.00, 130.92, 130.04, 129.95, 129.78, 129.39, 128.80, 128.51, 128.49, 128.47, 127.98, 127.96, 127.88, 127.59, 127.38, 127.24, 127.08, 127.07, 127.03, 126.97, 126.84, 126.65, 126.59, 124.76, 122.77, 122.02, 120.21, 116.66, 111.41, 54.13, 53.94, 21.55, 16.90, 14.77. **HRMS (ESI,  $m/z$ )** Calcd for C<sub>52</sub>H<sub>41</sub>N<sub>3</sub>O<sub>3</sub>S (M+H)<sup>+</sup>: 788.2941; Found: 788.2939.

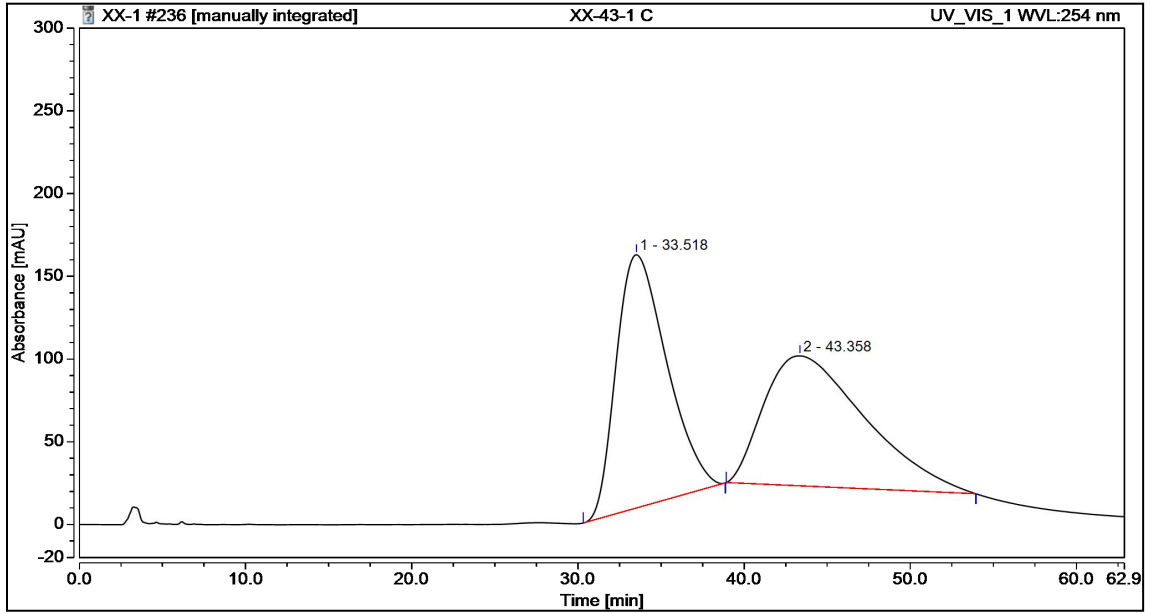

| Integration Results |           |                       |                 |                |                    |                      |                |
|---------------------|-----------|-----------------------|-----------------|----------------|--------------------|----------------------|----------------|
| No.                 | Peak Name | Retention Time<br>min | Area<br>mAU*min | Height<br>mAU  | Relative Area<br>% | Relative Height<br>% | Amount<br>n.a. |
| 1                   |           | 33.518                | 538.896         | 153.120        | 49.22              | 66.10                | n.a.           |
| 2                   |           | 43.358                | 555.953         | 78.542         | 50.78              | 33.90                | n.a.           |
| <b>Total:</b>       |           |                       | <b>1094.849</b> | <b>231.662</b> | <b>100.00</b>      | <b>100.00</b>        |                |

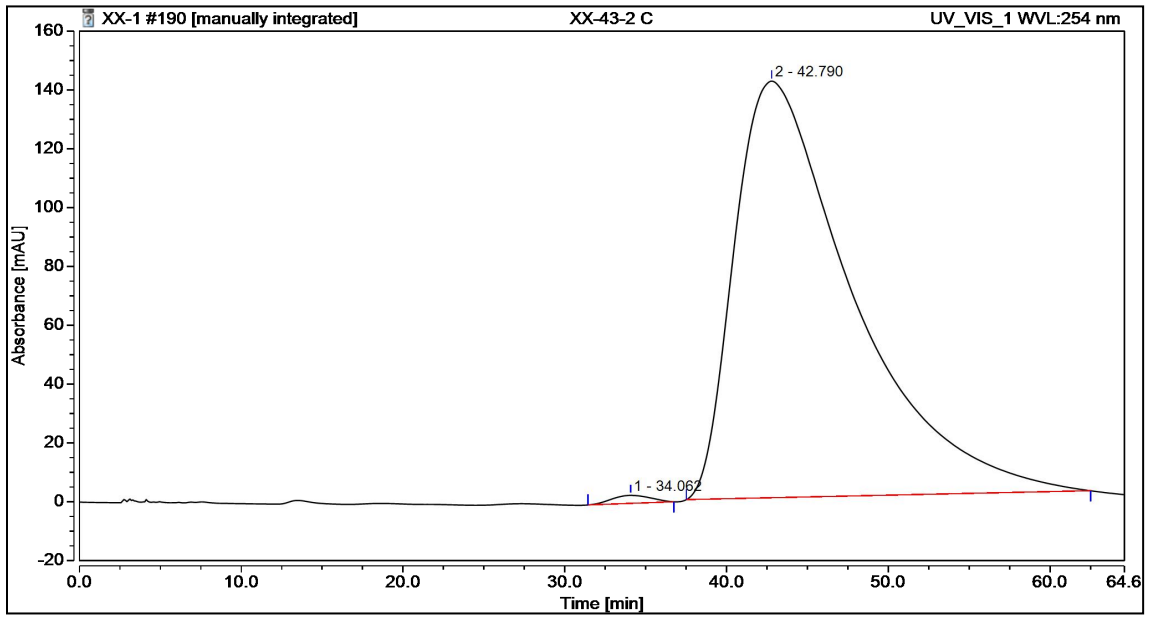

| Integration Results |           |                       |                 |                |                    |                      |                |
|---------------------|-----------|-----------------------|-----------------|----------------|--------------------|----------------------|----------------|
| No.                 | Peak Name | Retention Time<br>min | Area<br>mAU*min | Height<br>mAU  | Relative Area<br>% | Relative Height<br>% | Amount<br>n.a. |
| 1                   |           | 34.062                | 7.632           | 2.744          | 0.63               | 1.90                 | n.a.           |
| 2                   |           | 42.790                | 1202.327        | 141.659        | 99.37              | 98.10                | n.a.           |
| <b>Total:</b>       |           |                       | <b>1209.959</b> | <b>144.403</b> | <b>100.00</b>      | <b>100.00</b>        |                |

## 8. NMR spectra

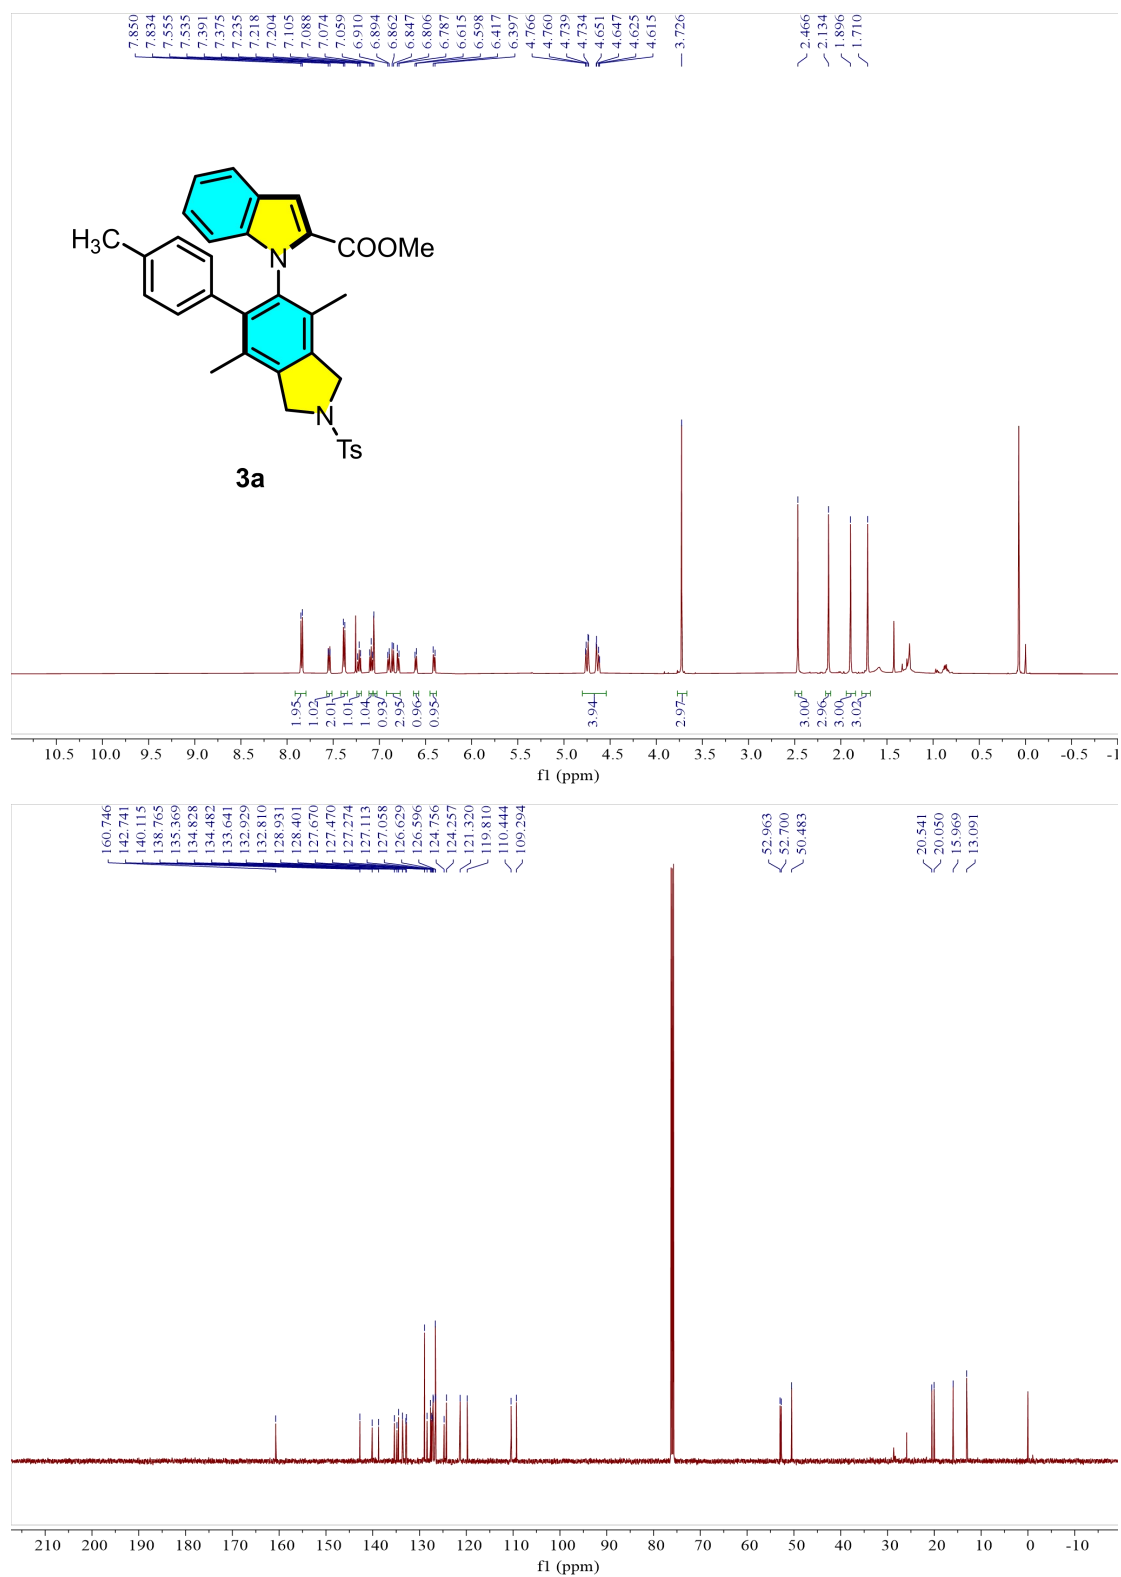

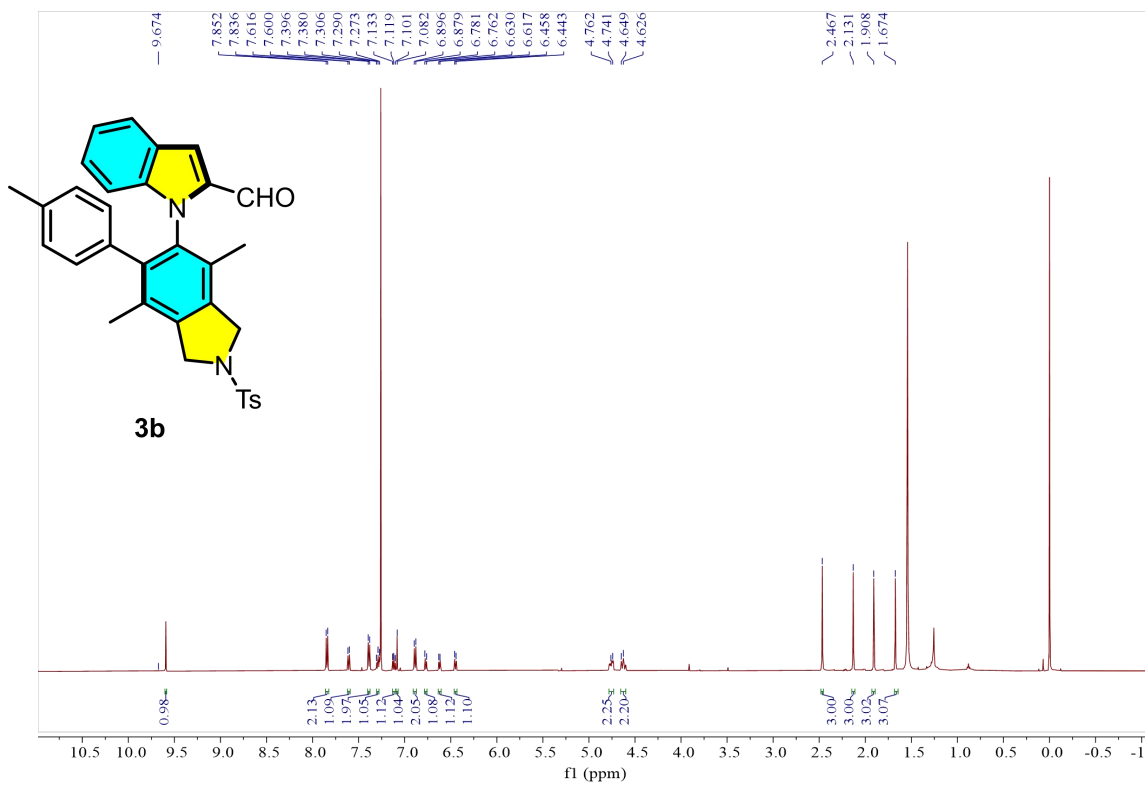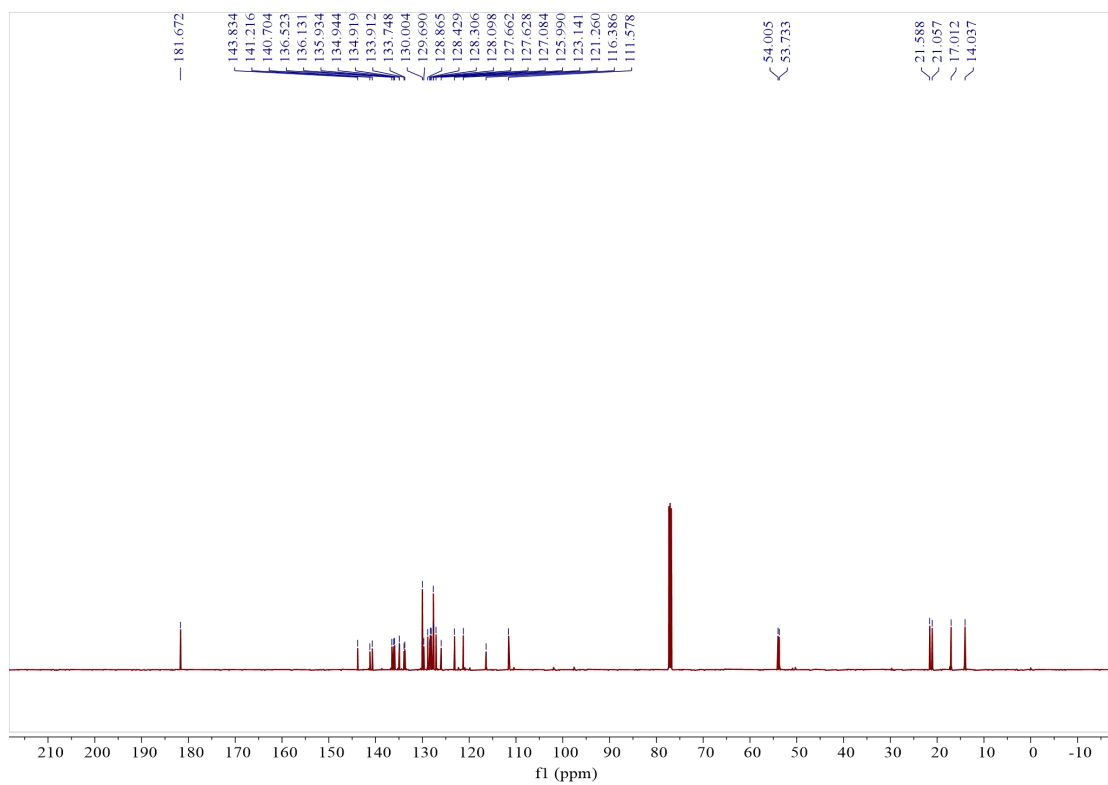

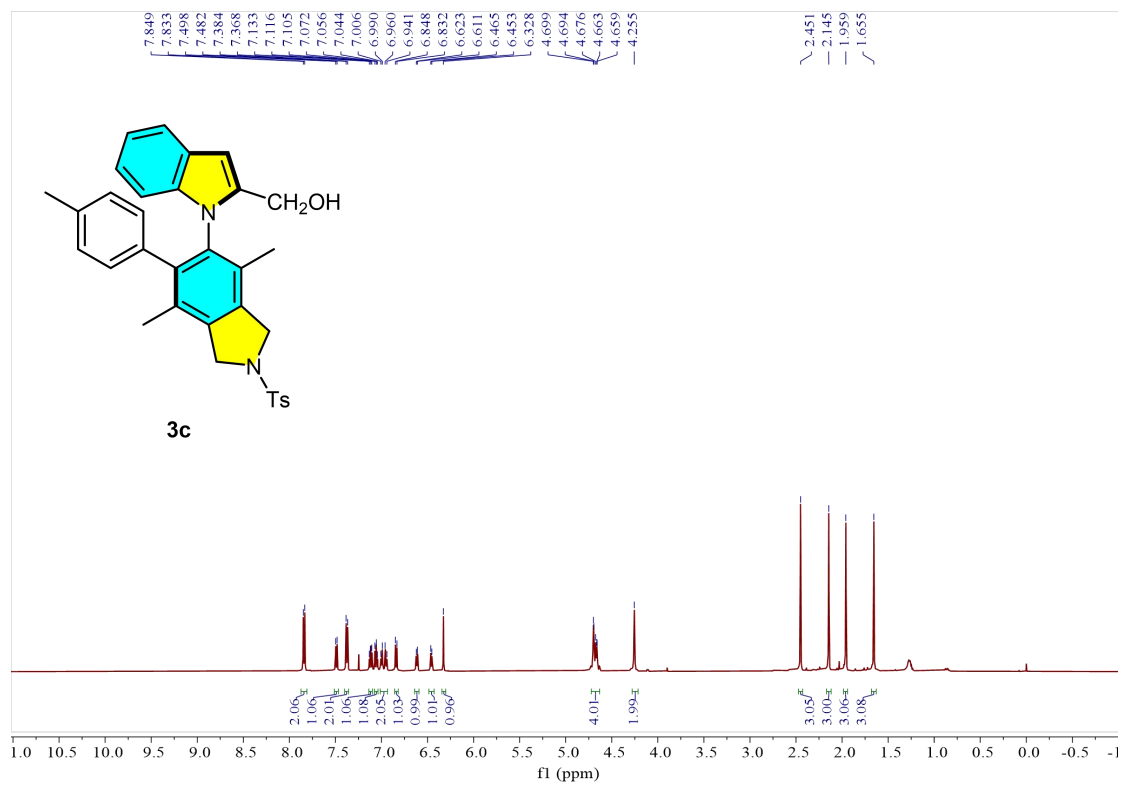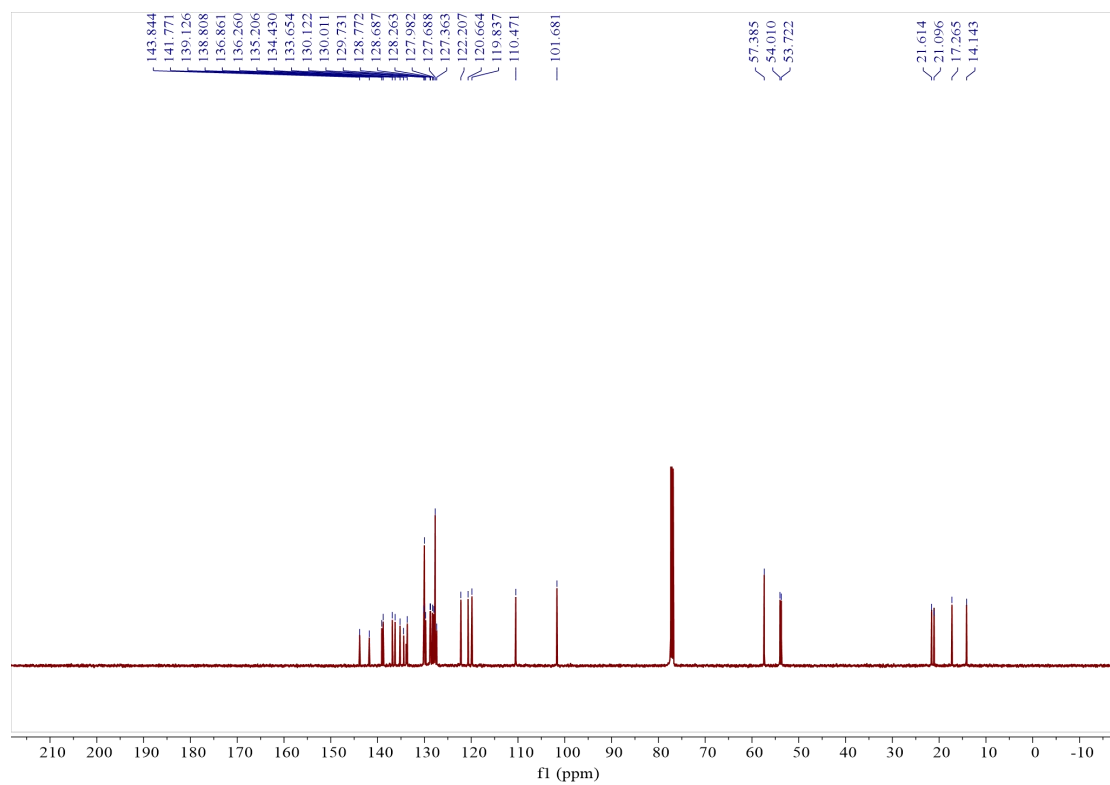

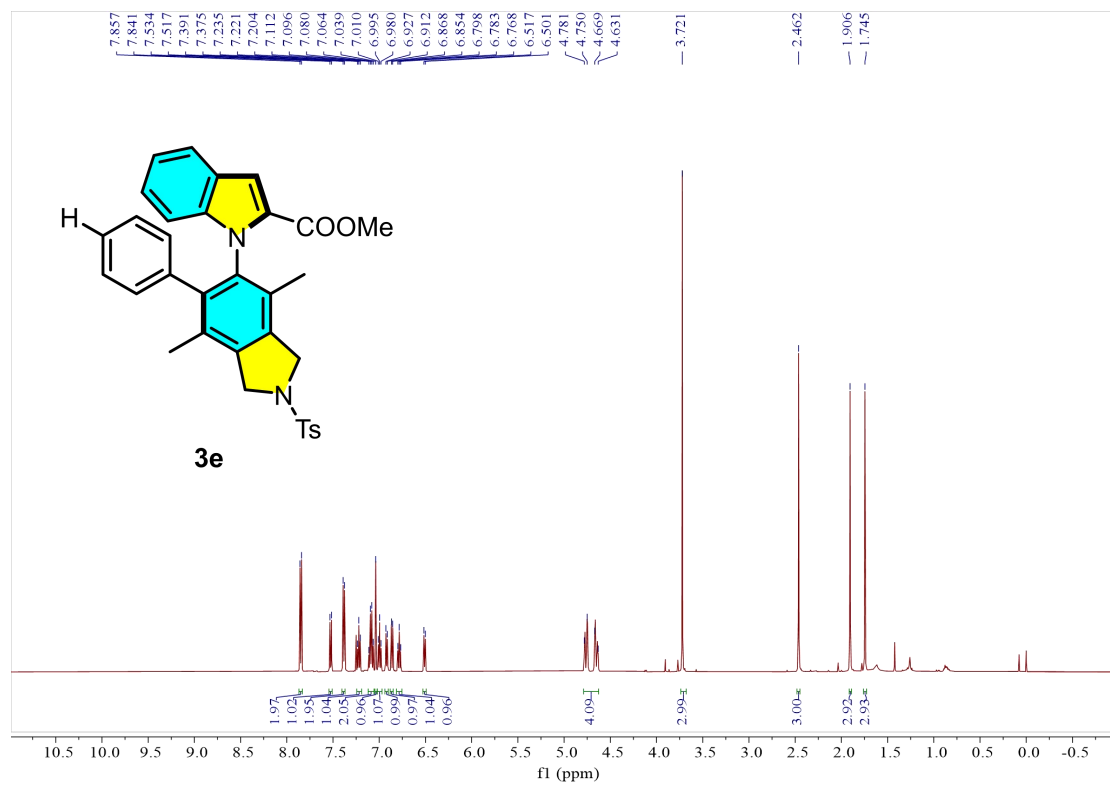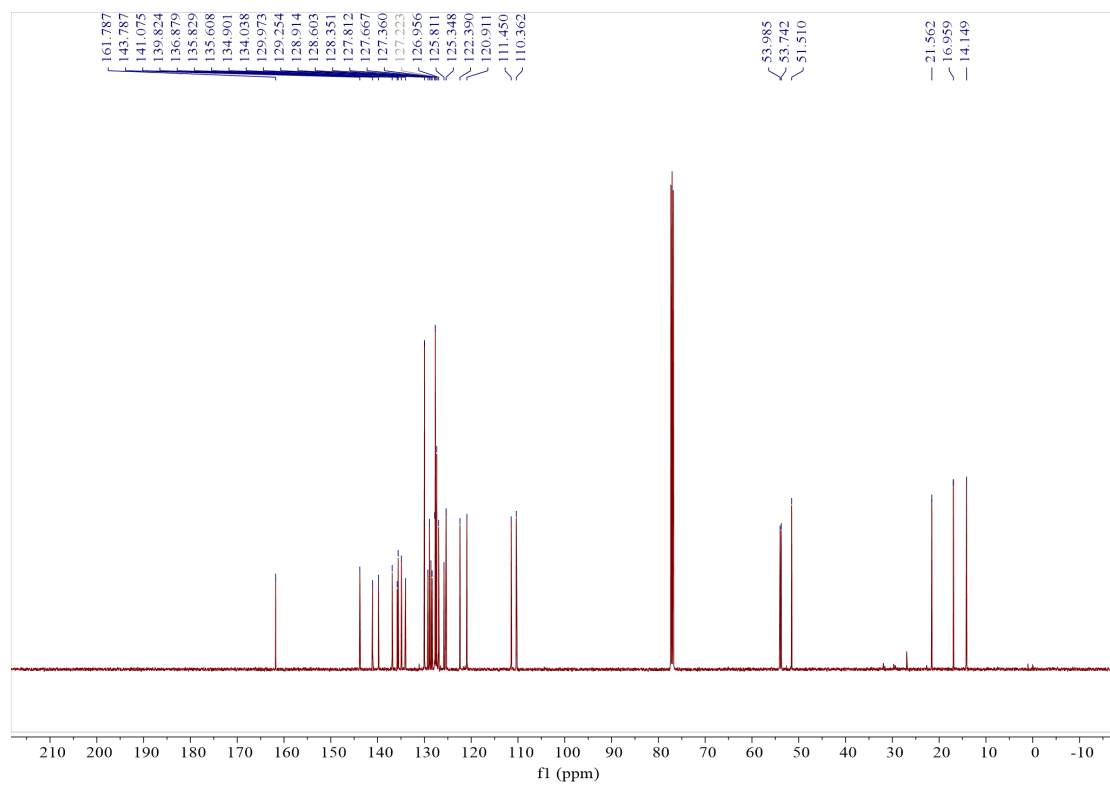

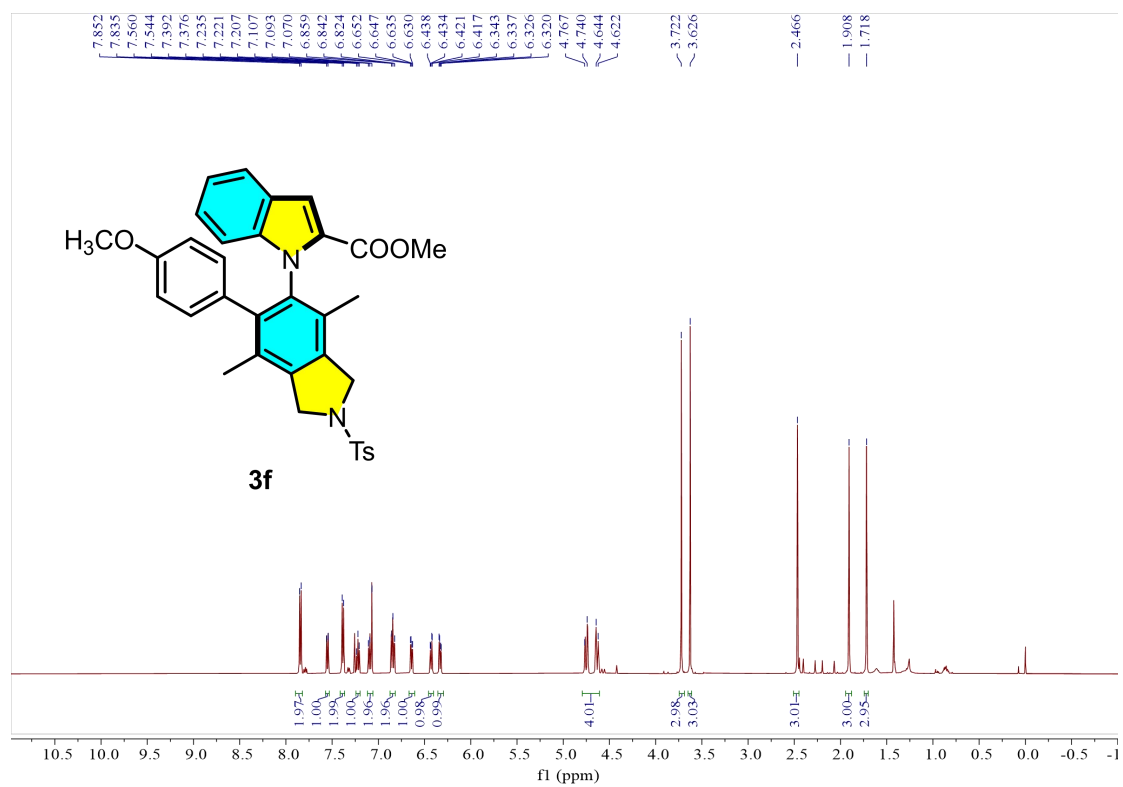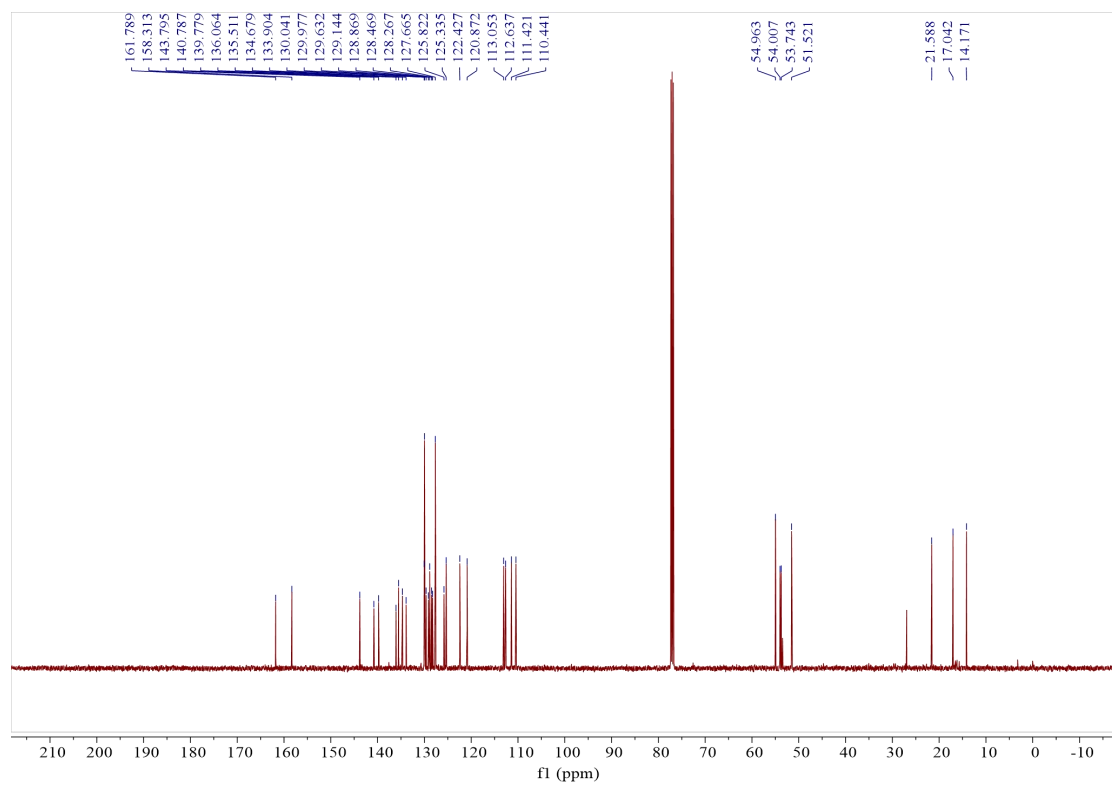



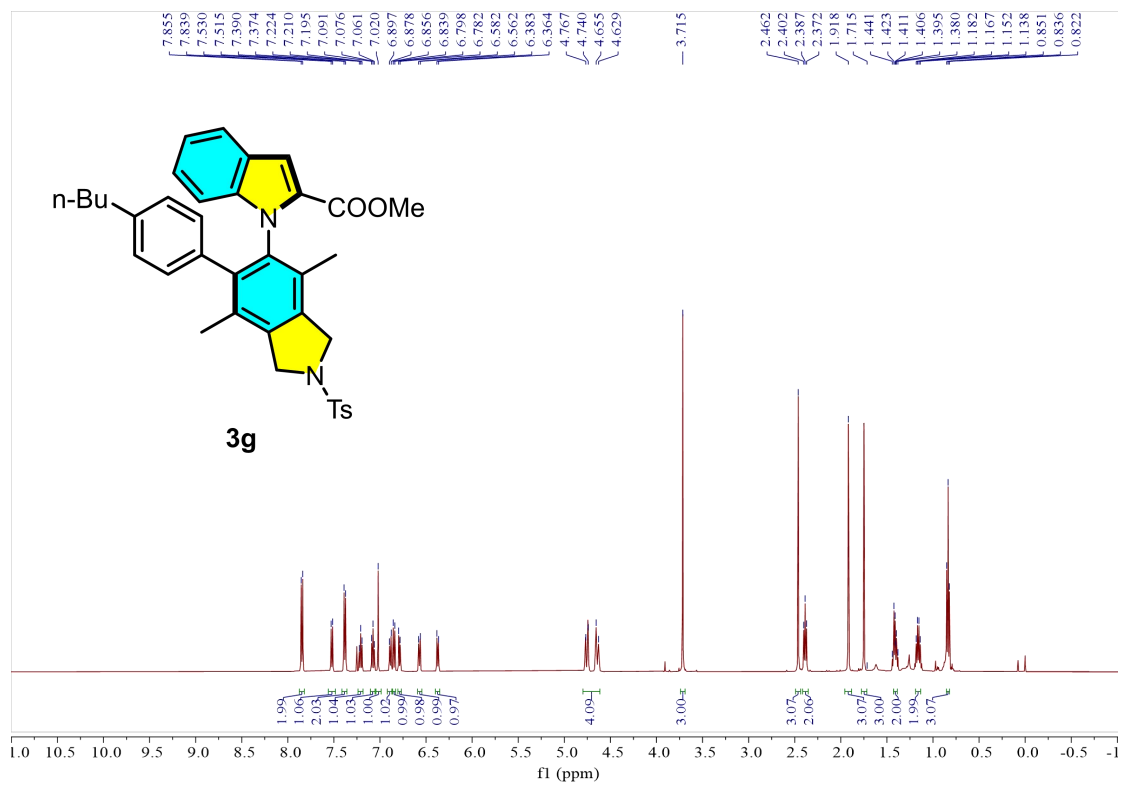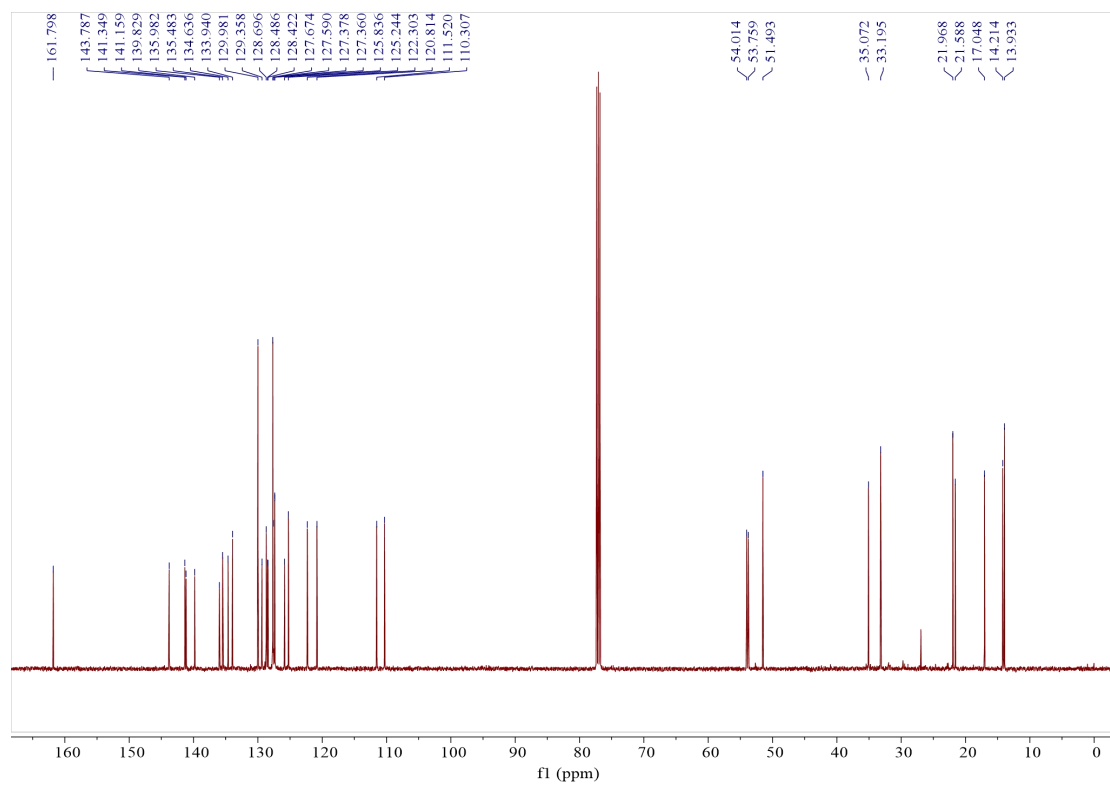

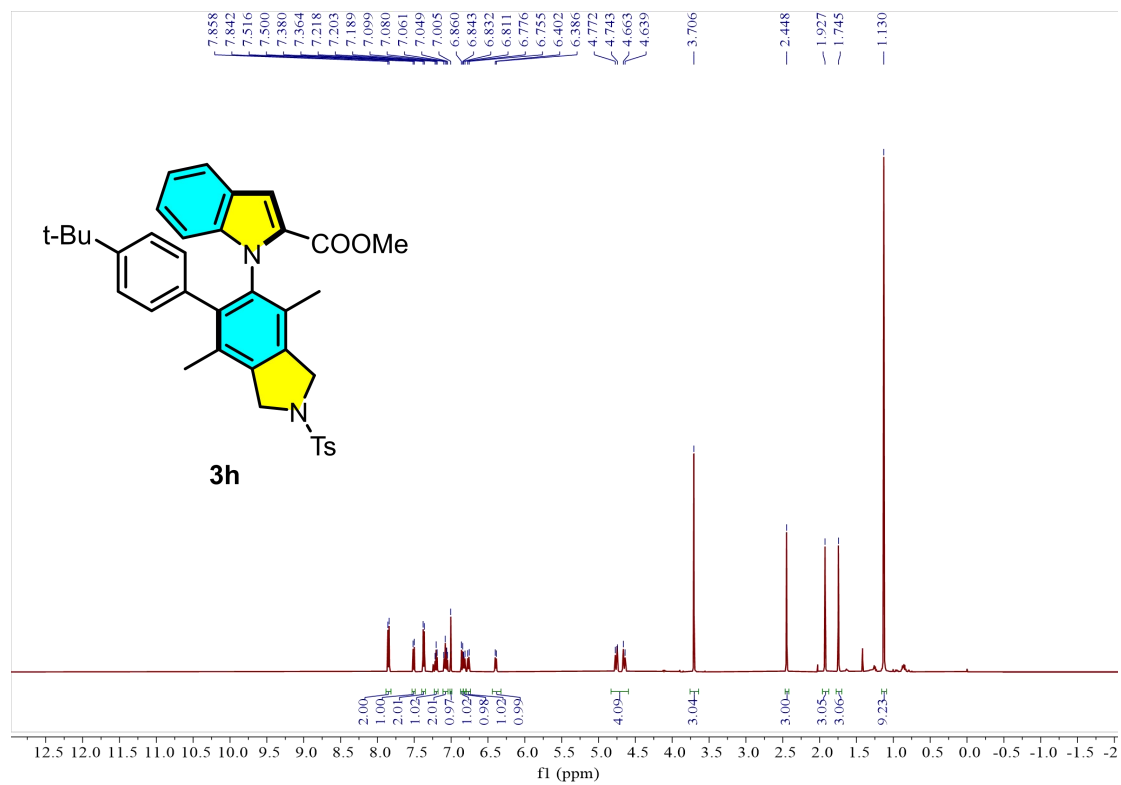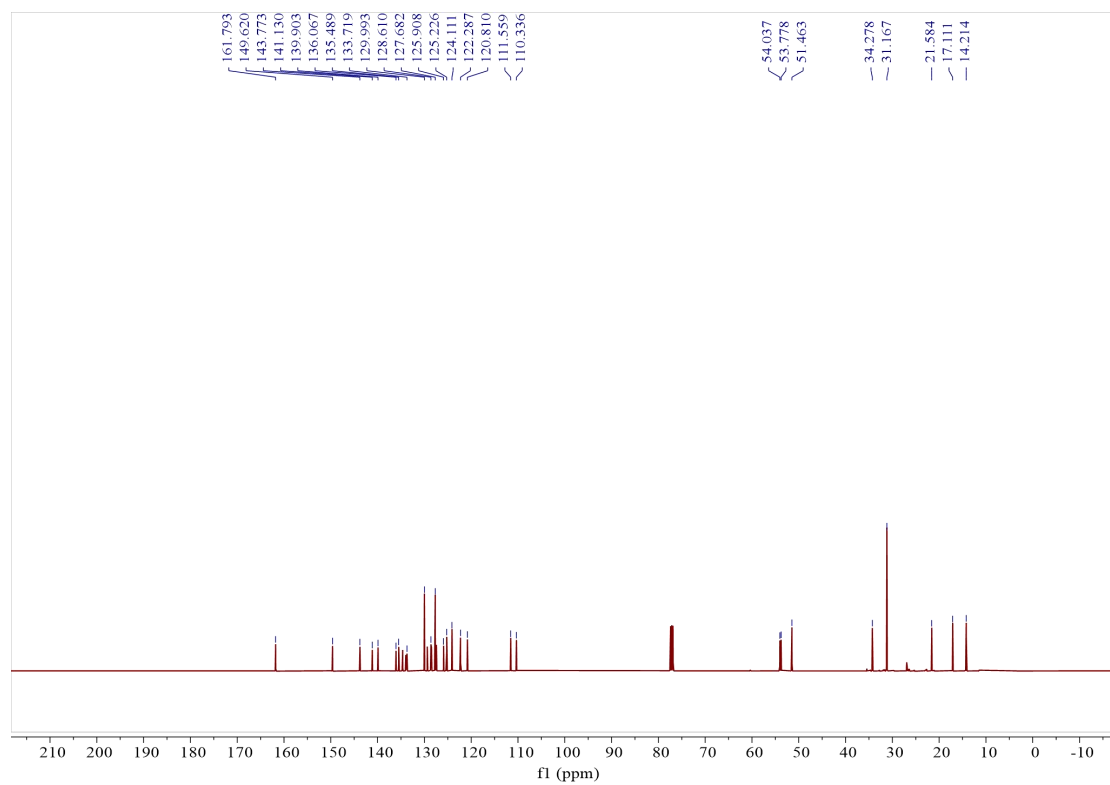

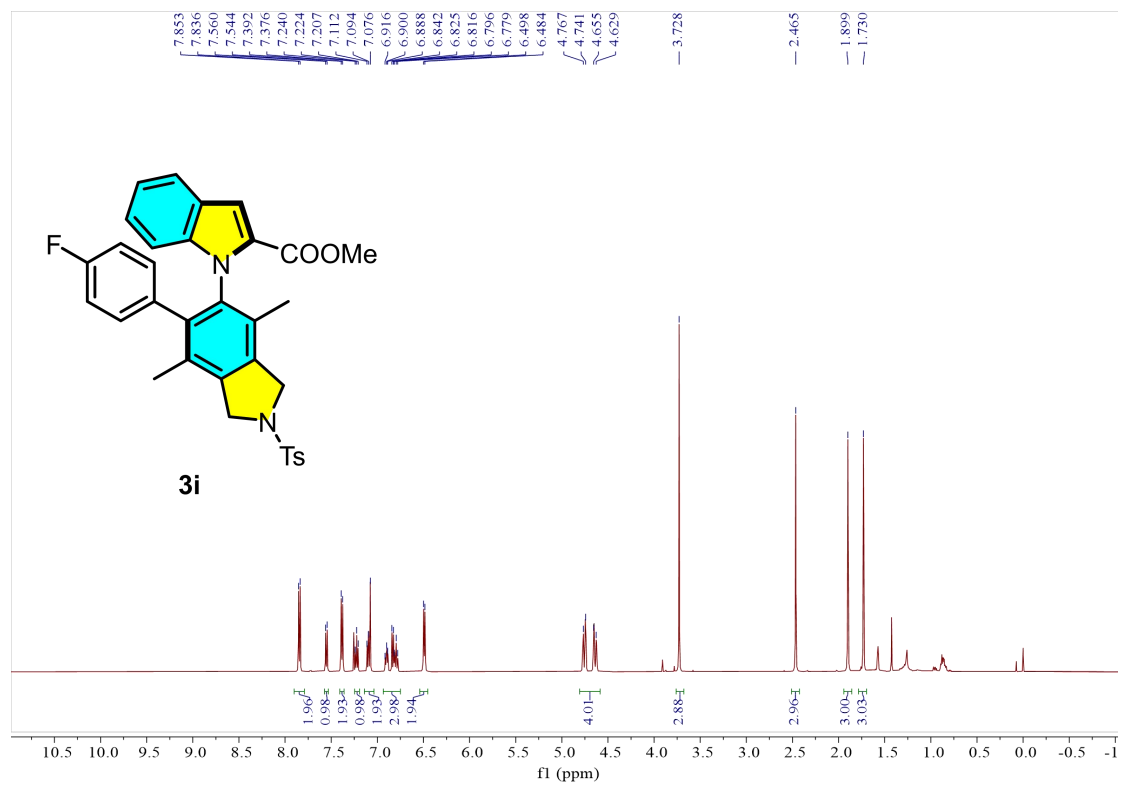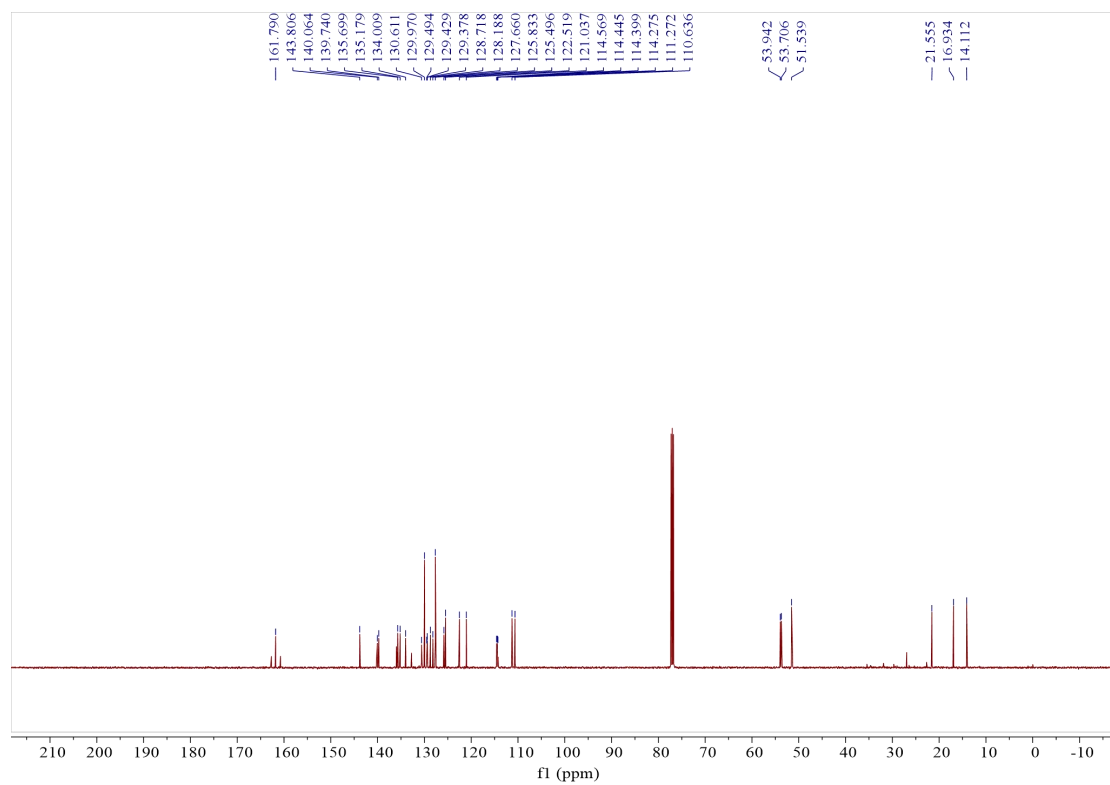

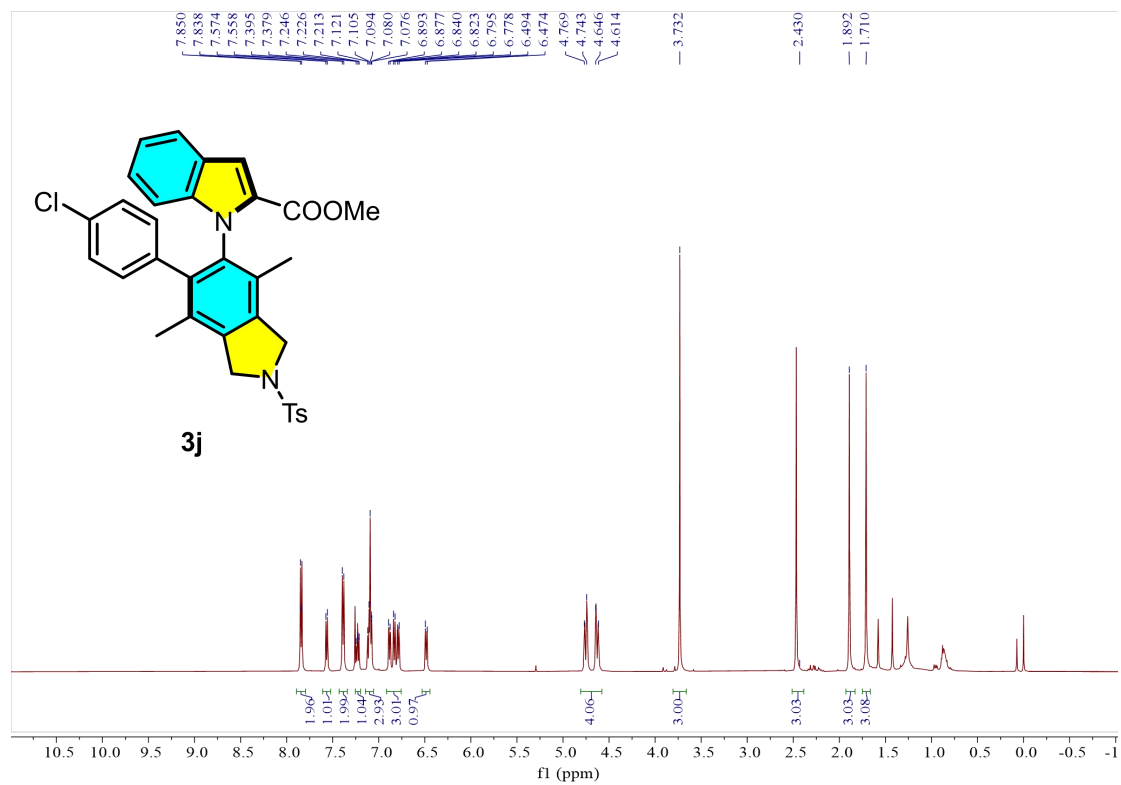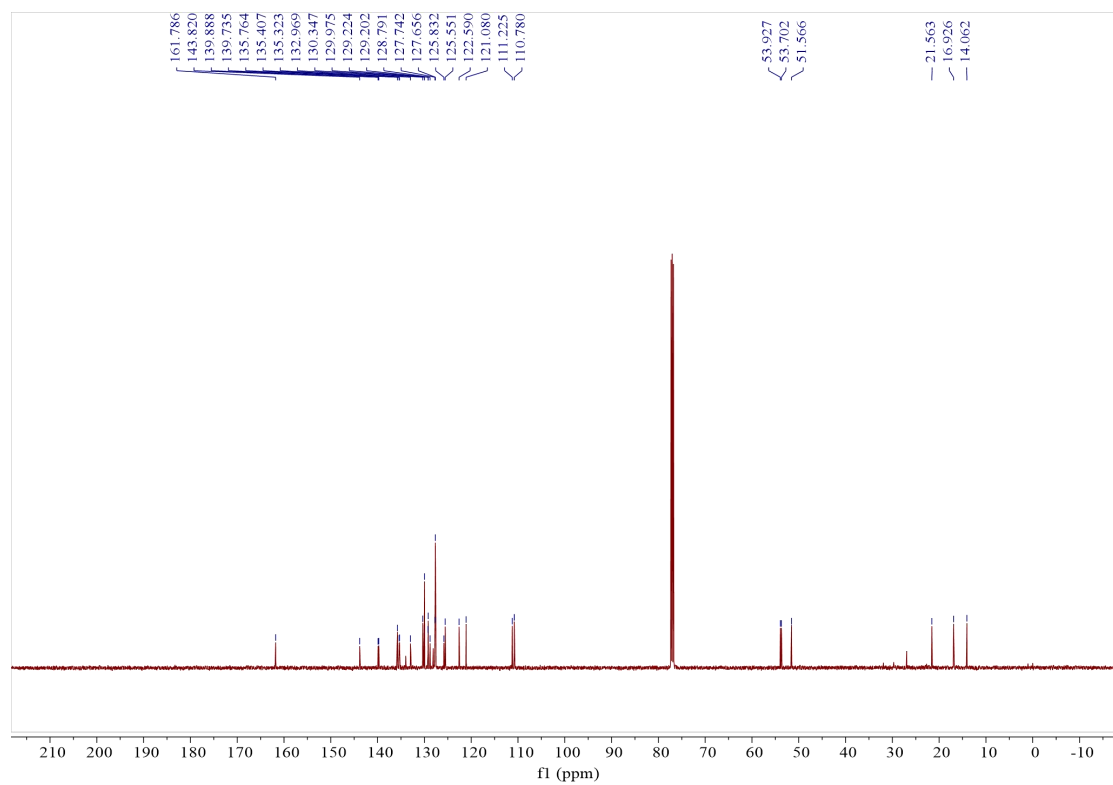

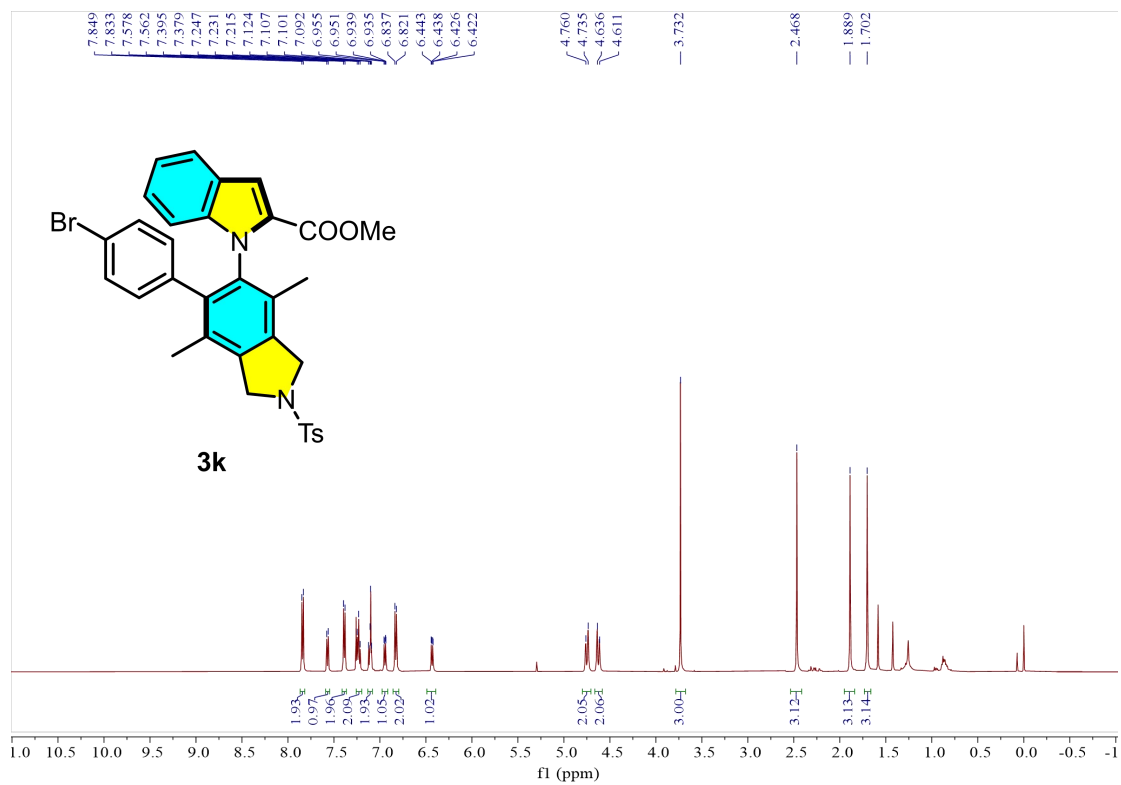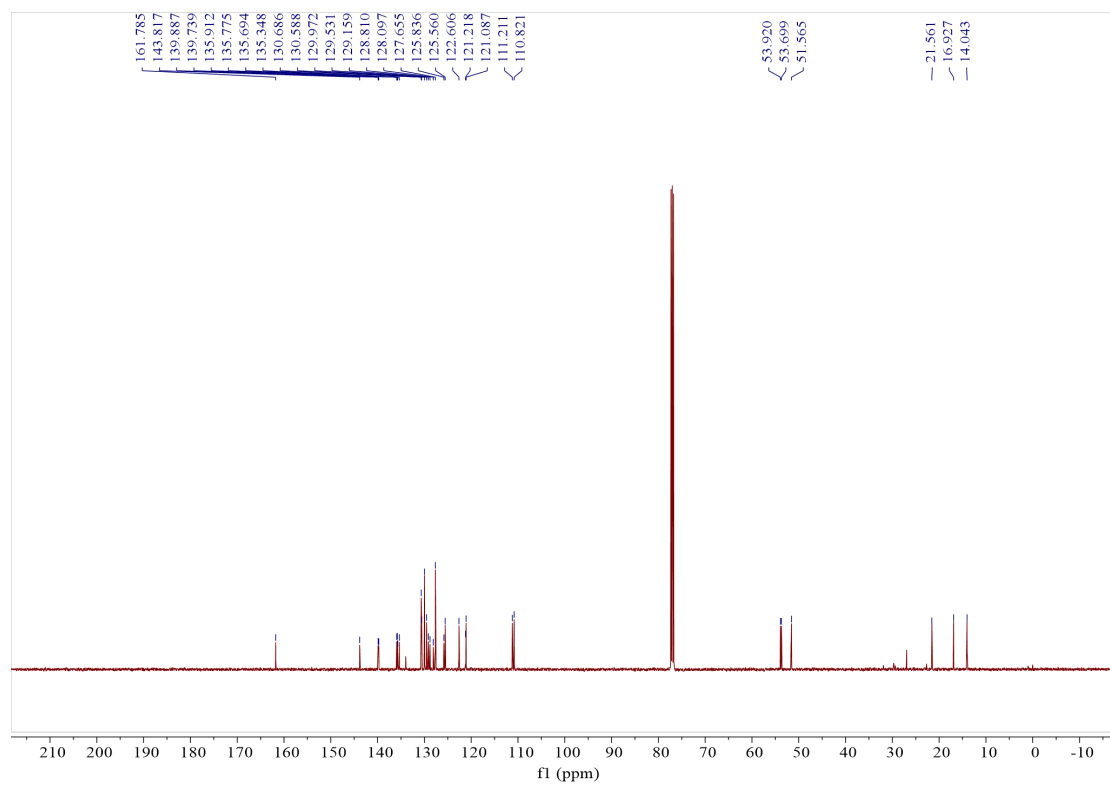

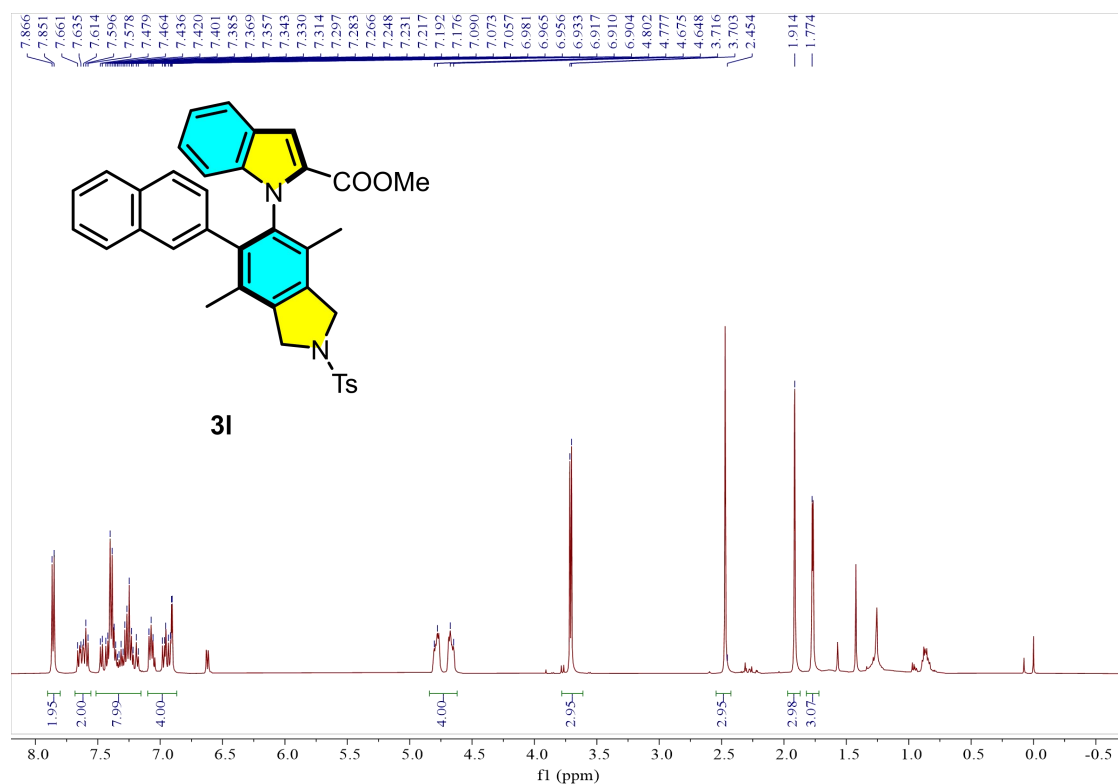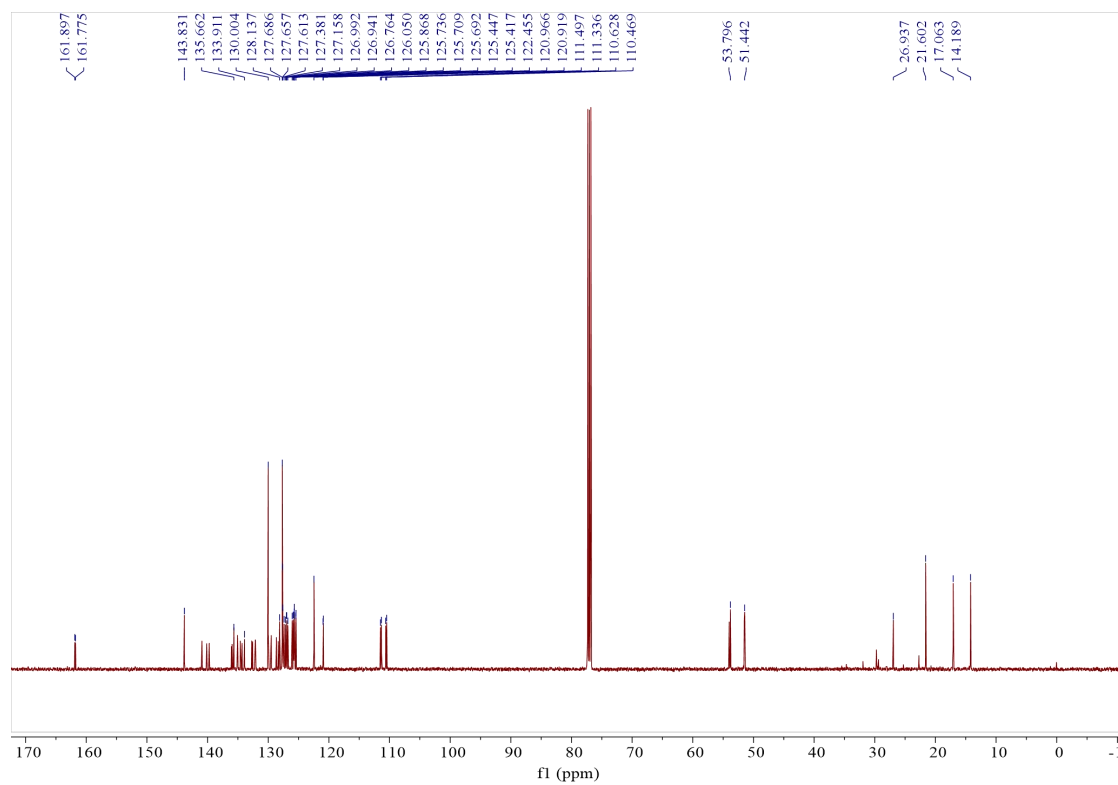

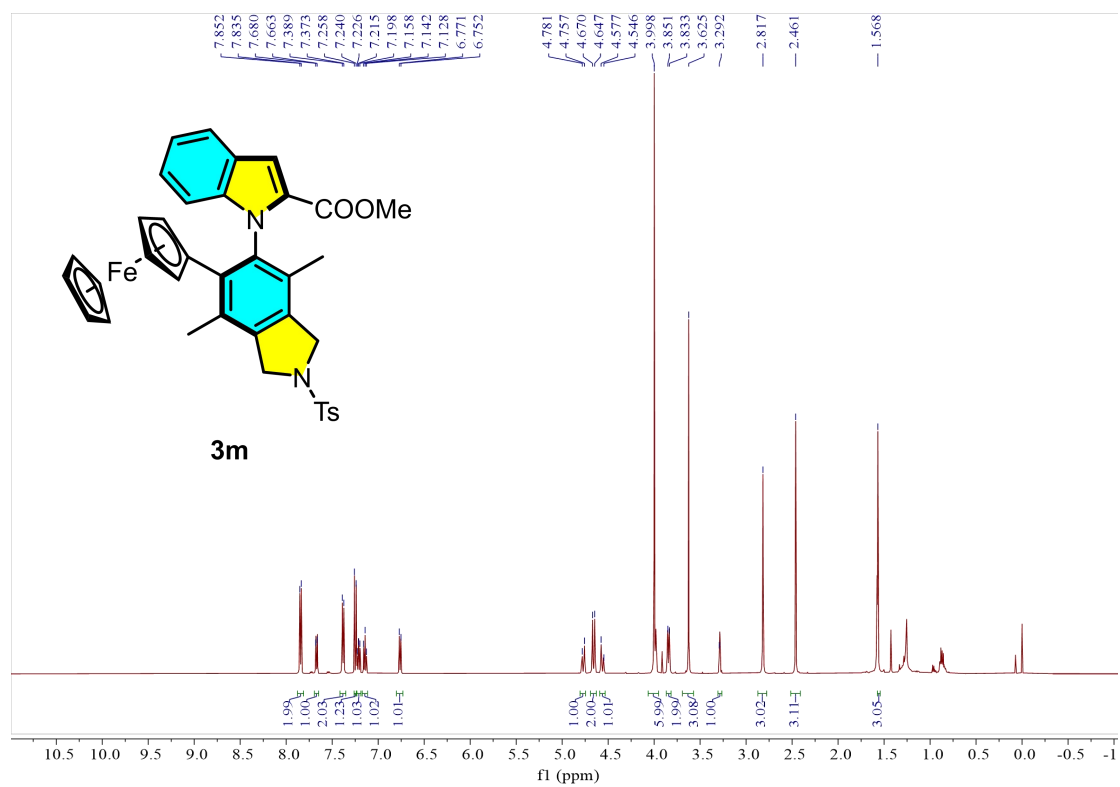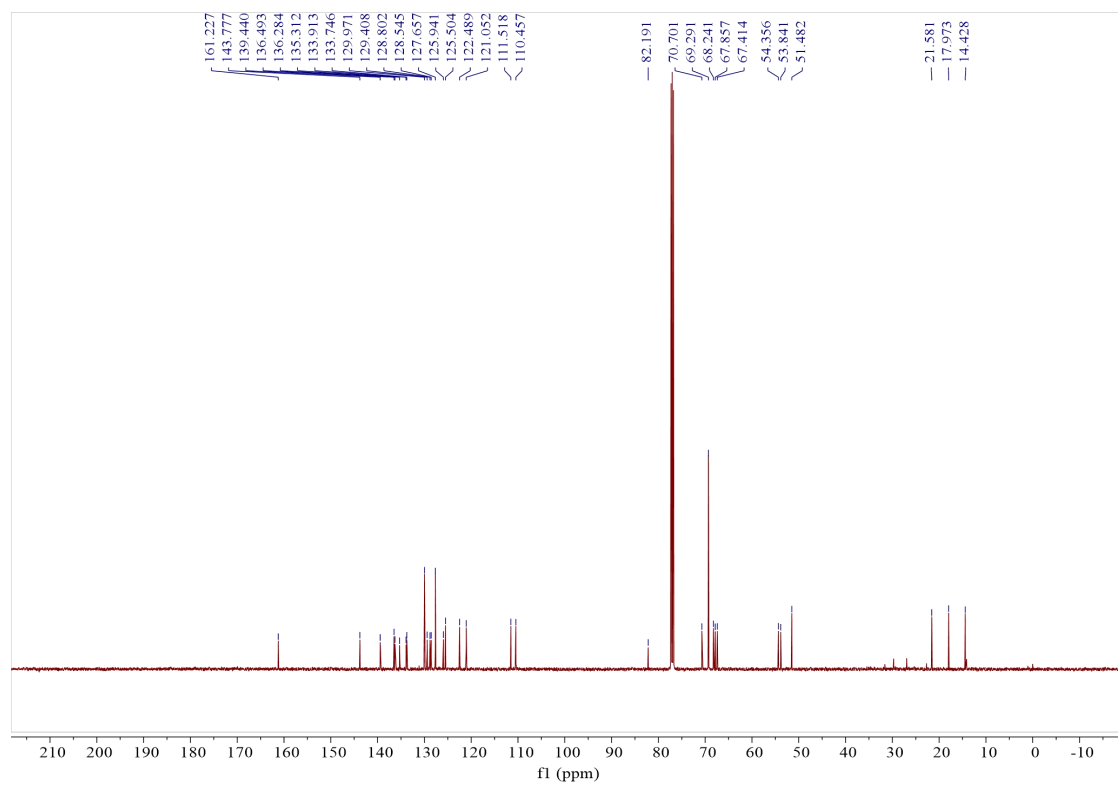

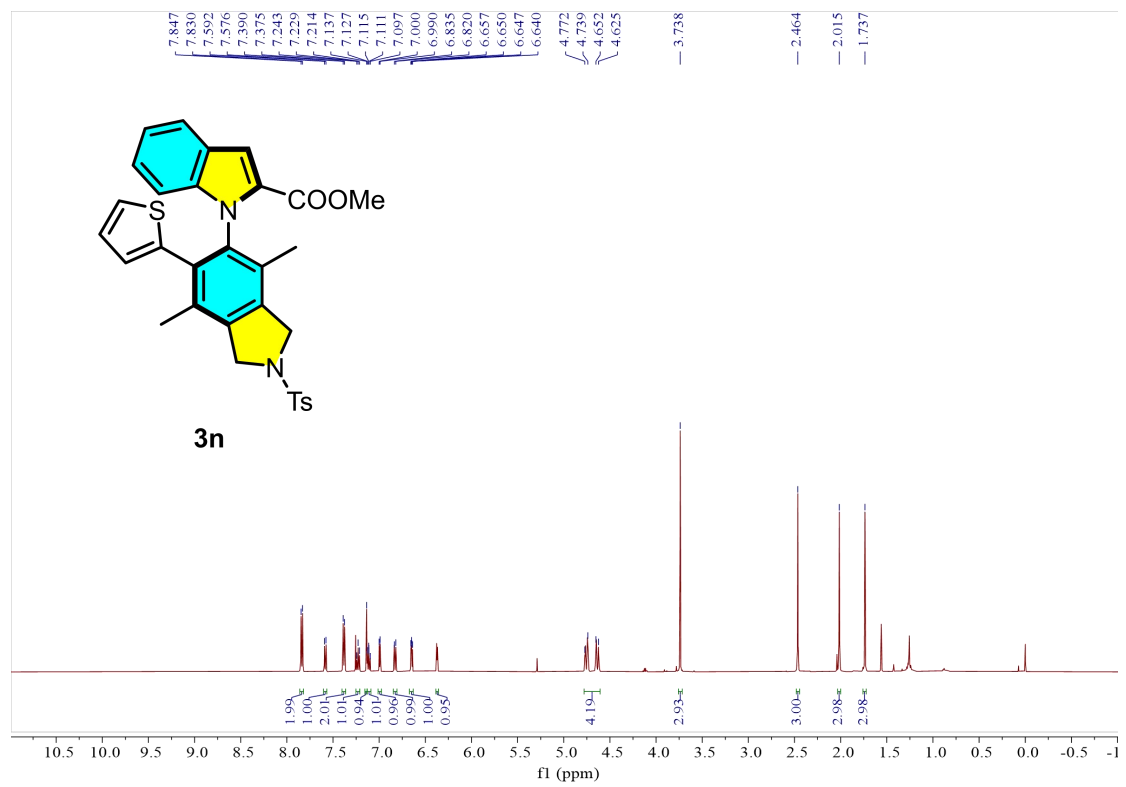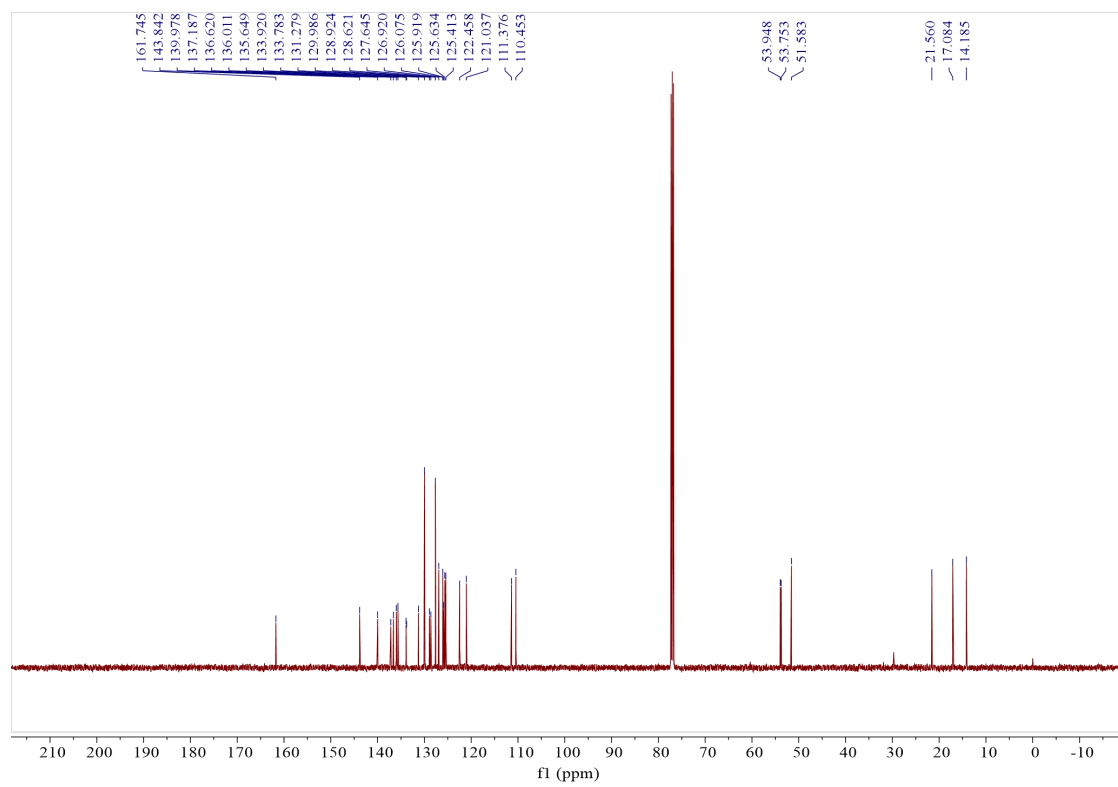



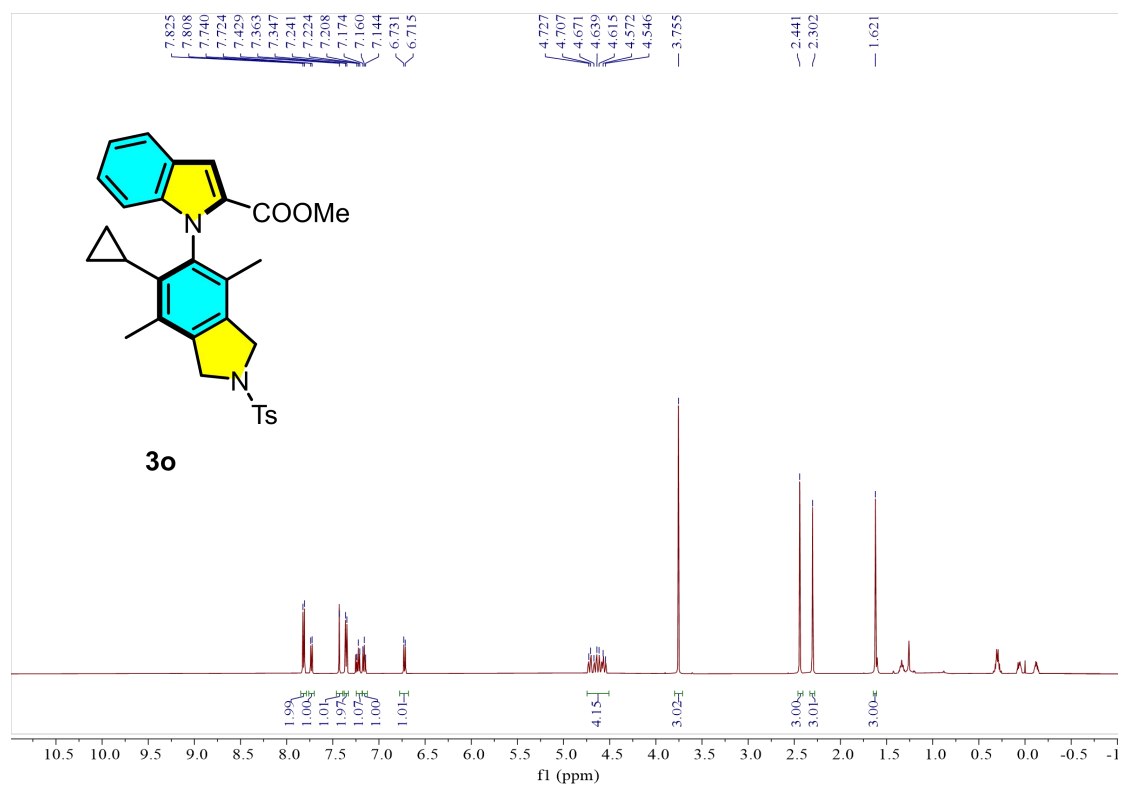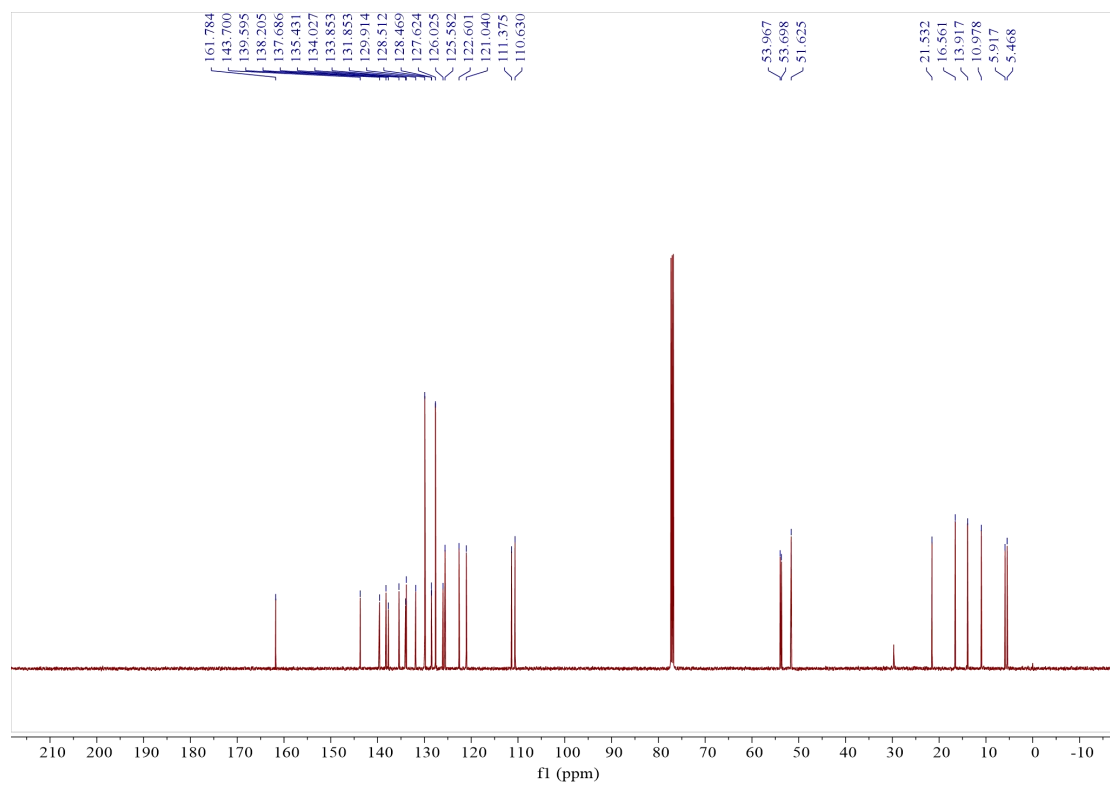

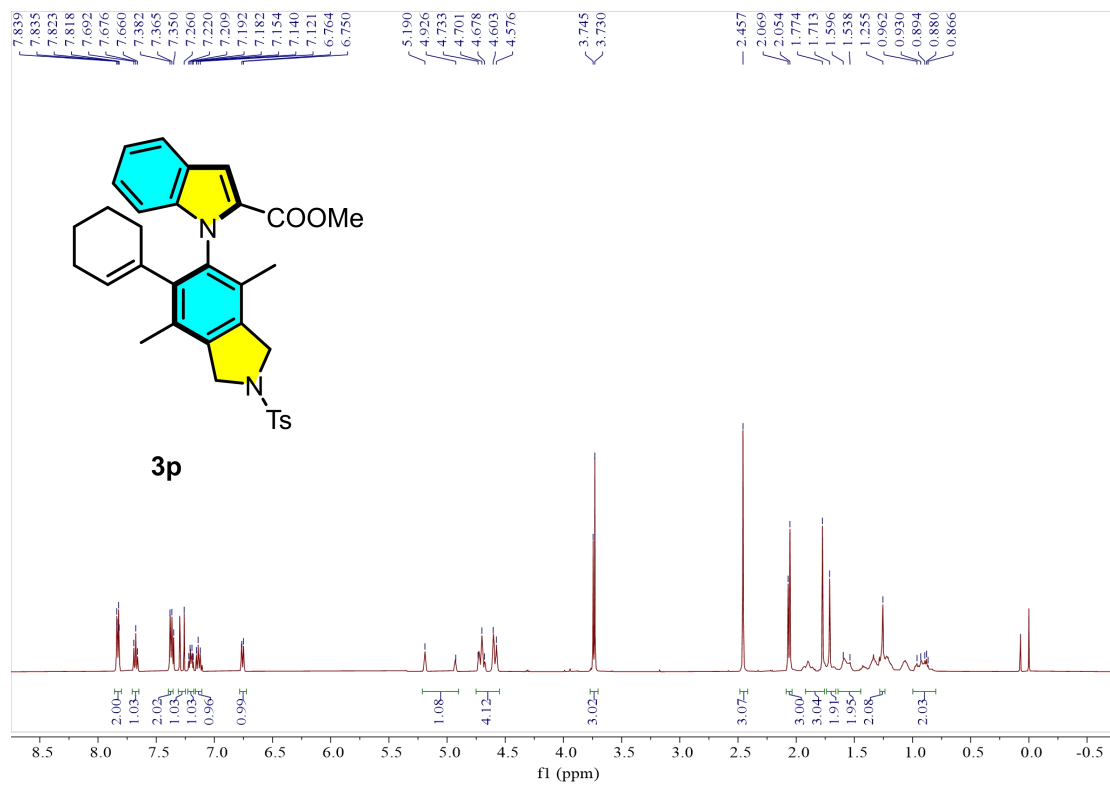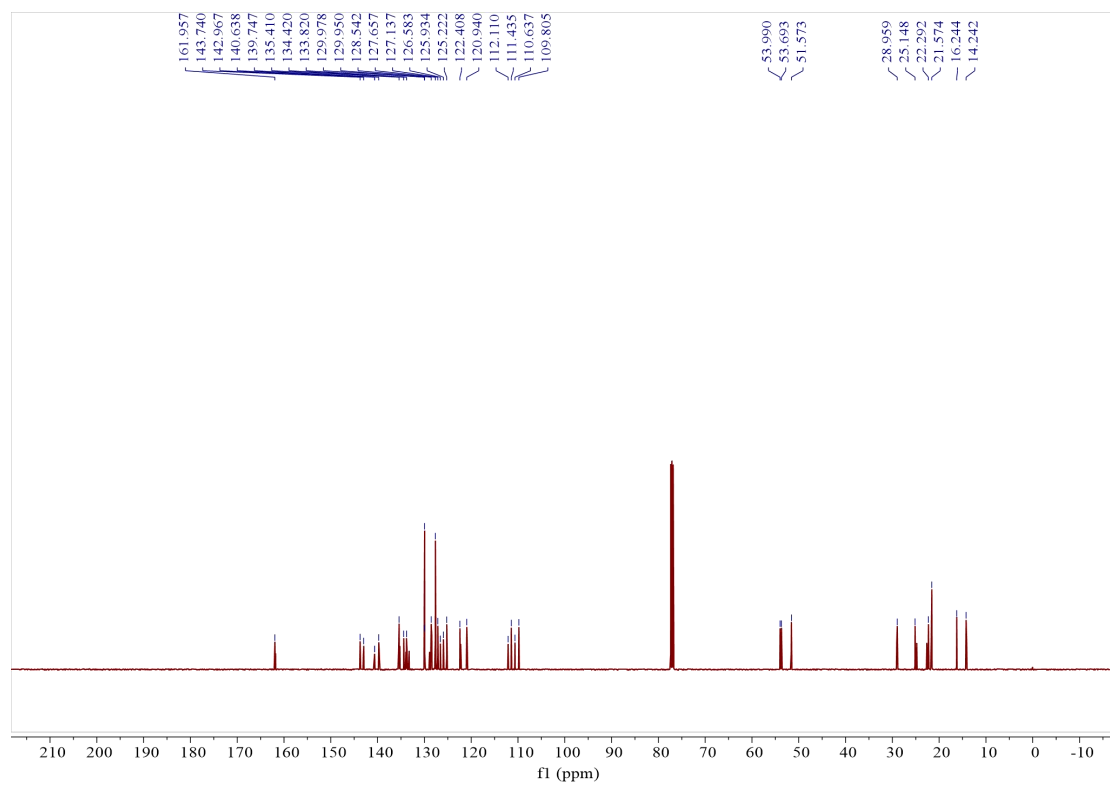

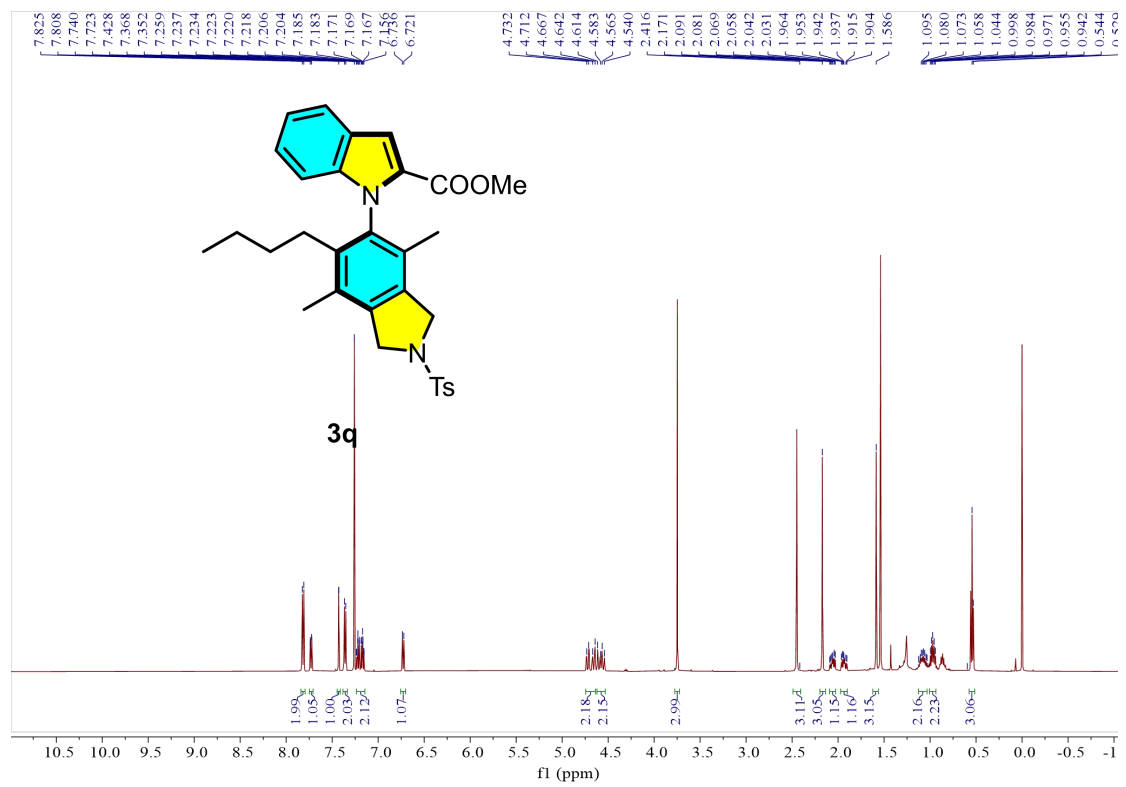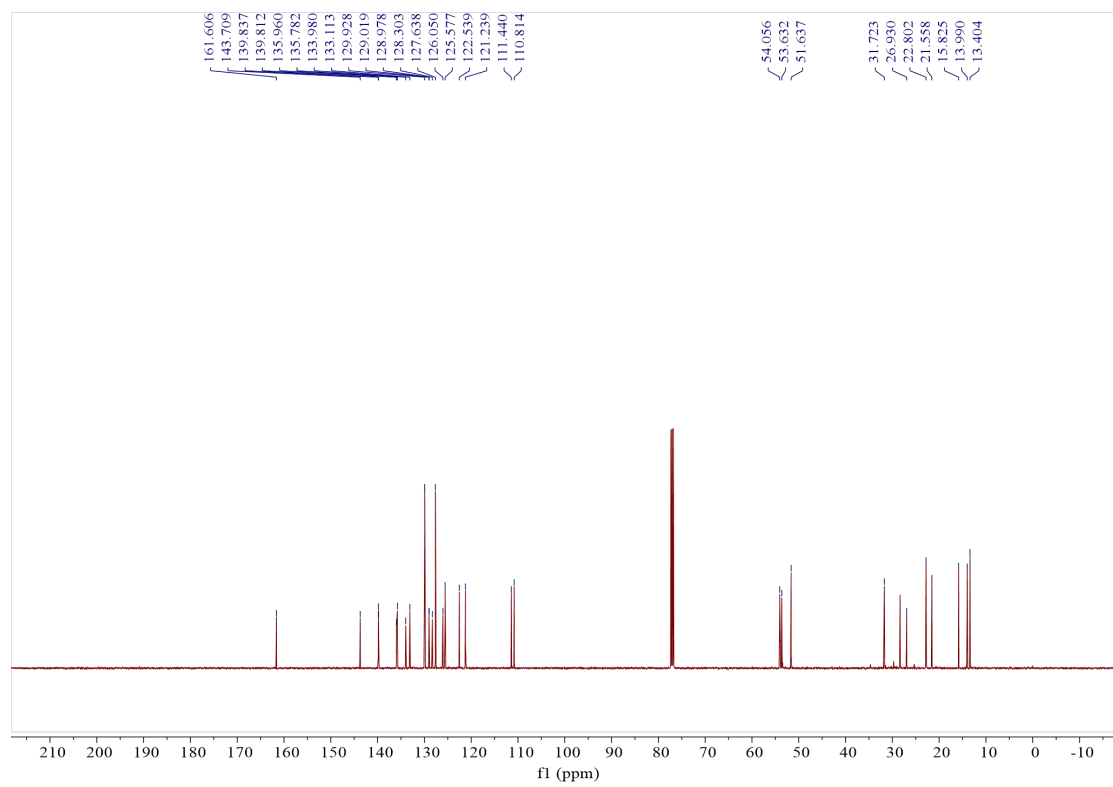

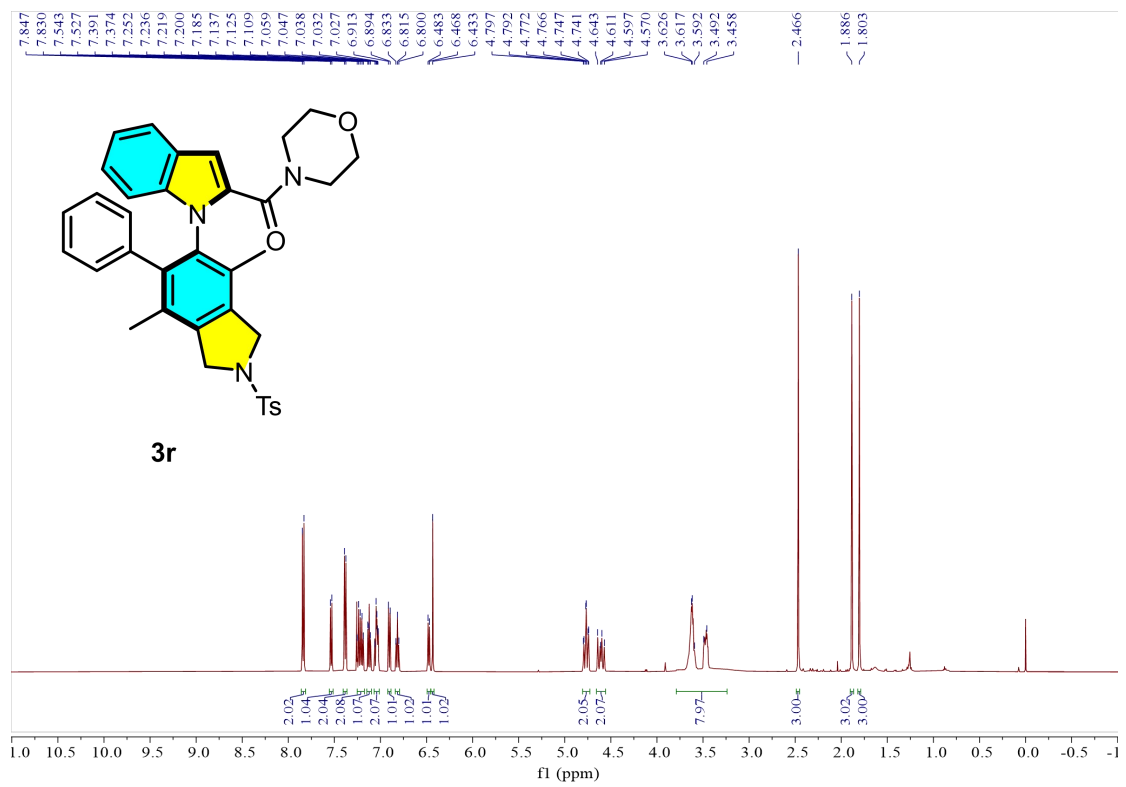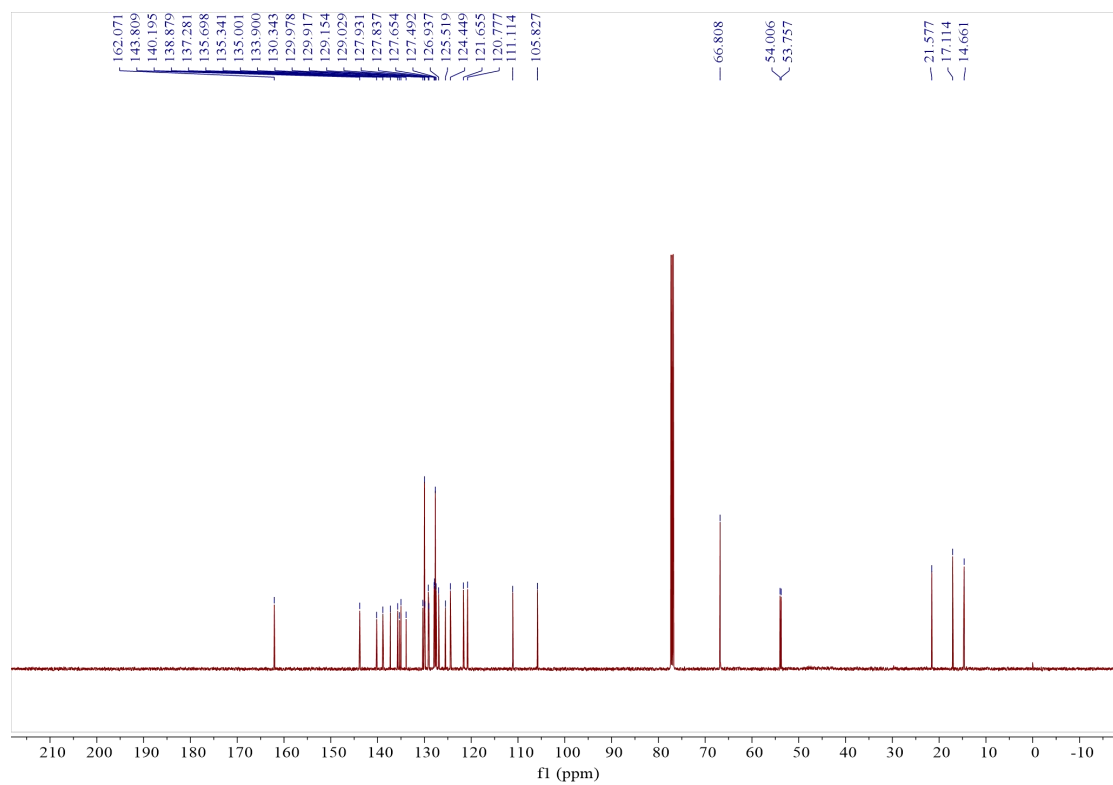

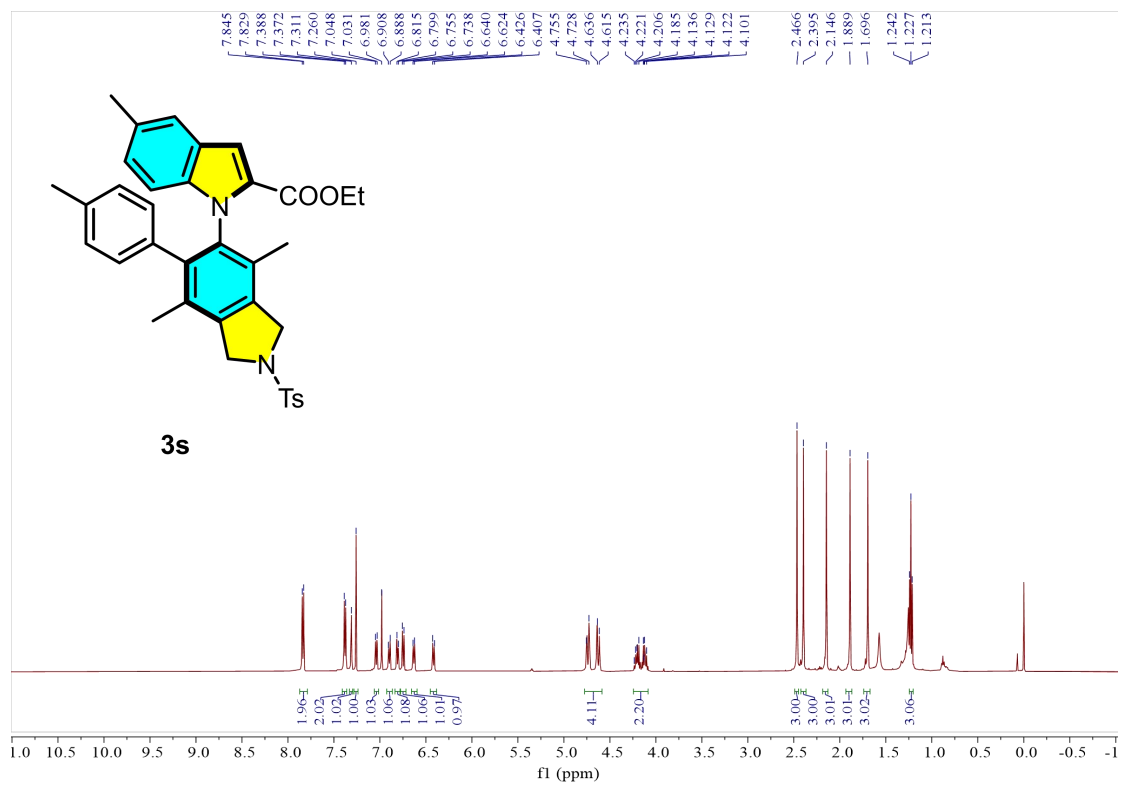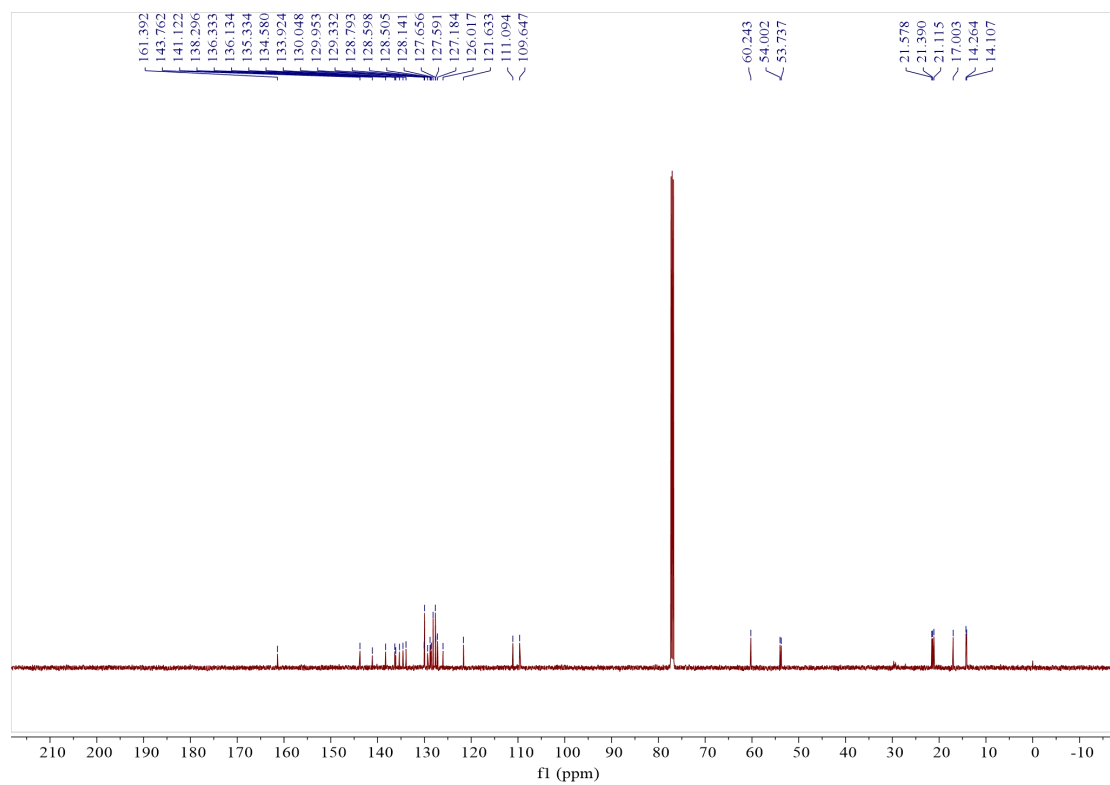

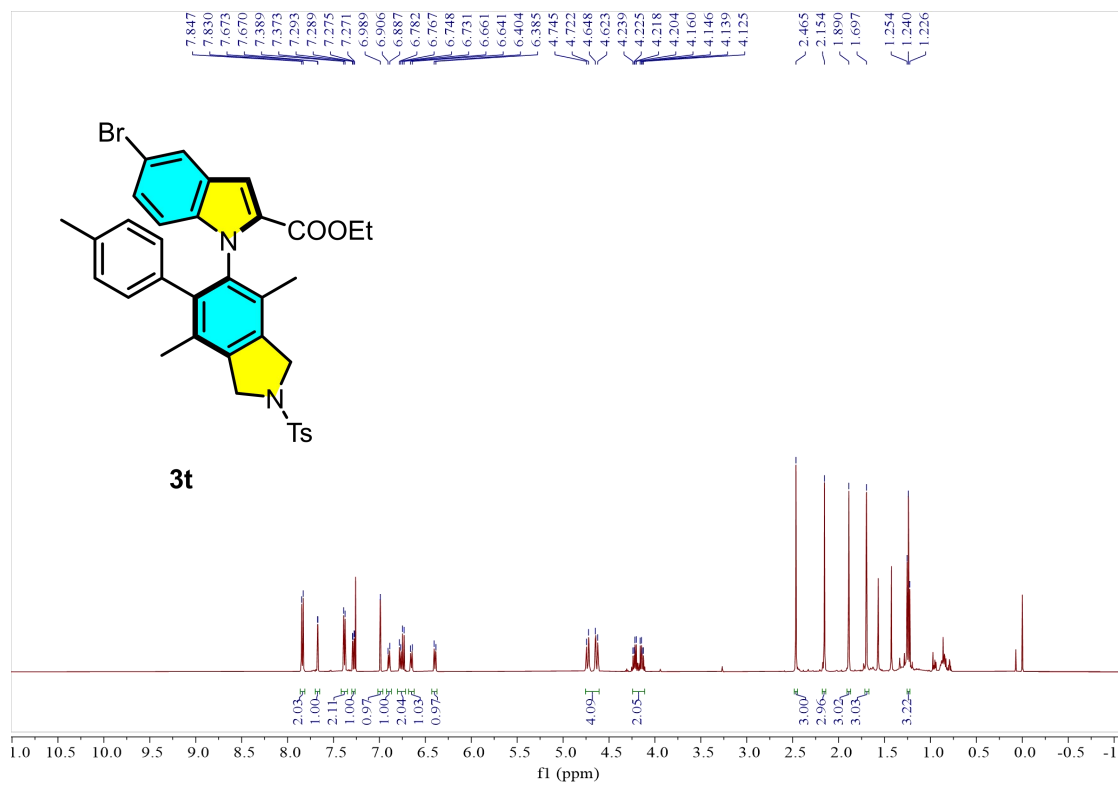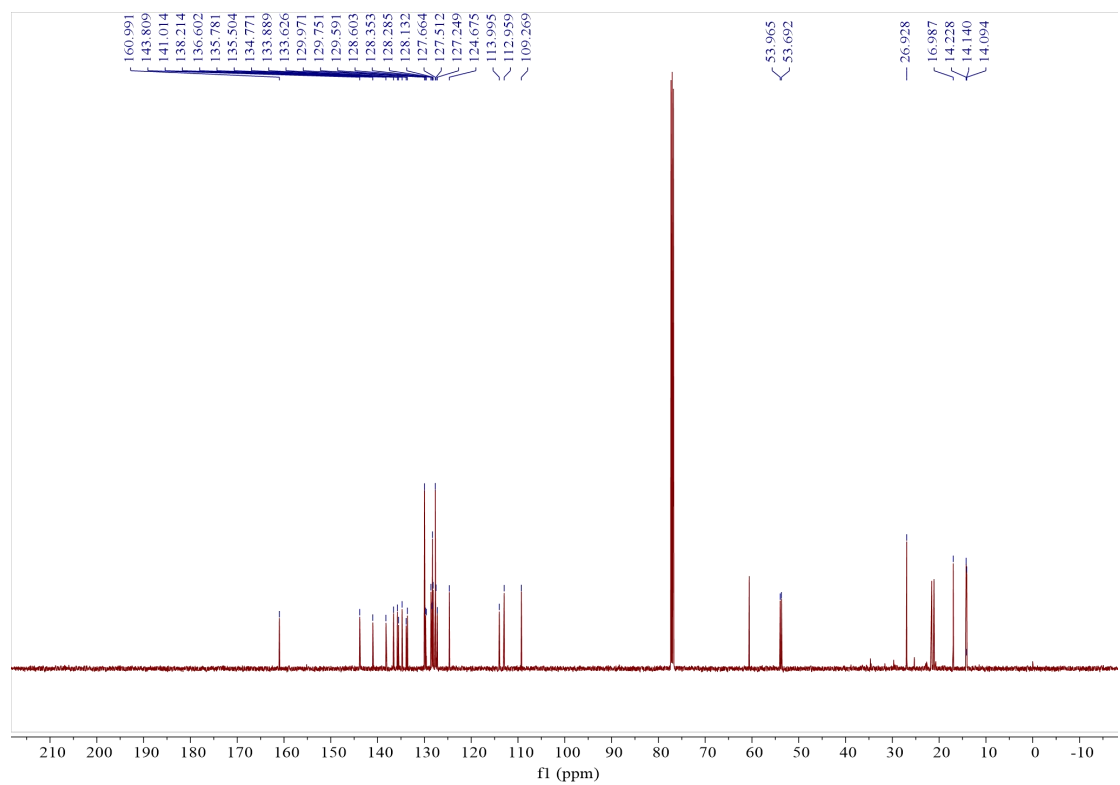

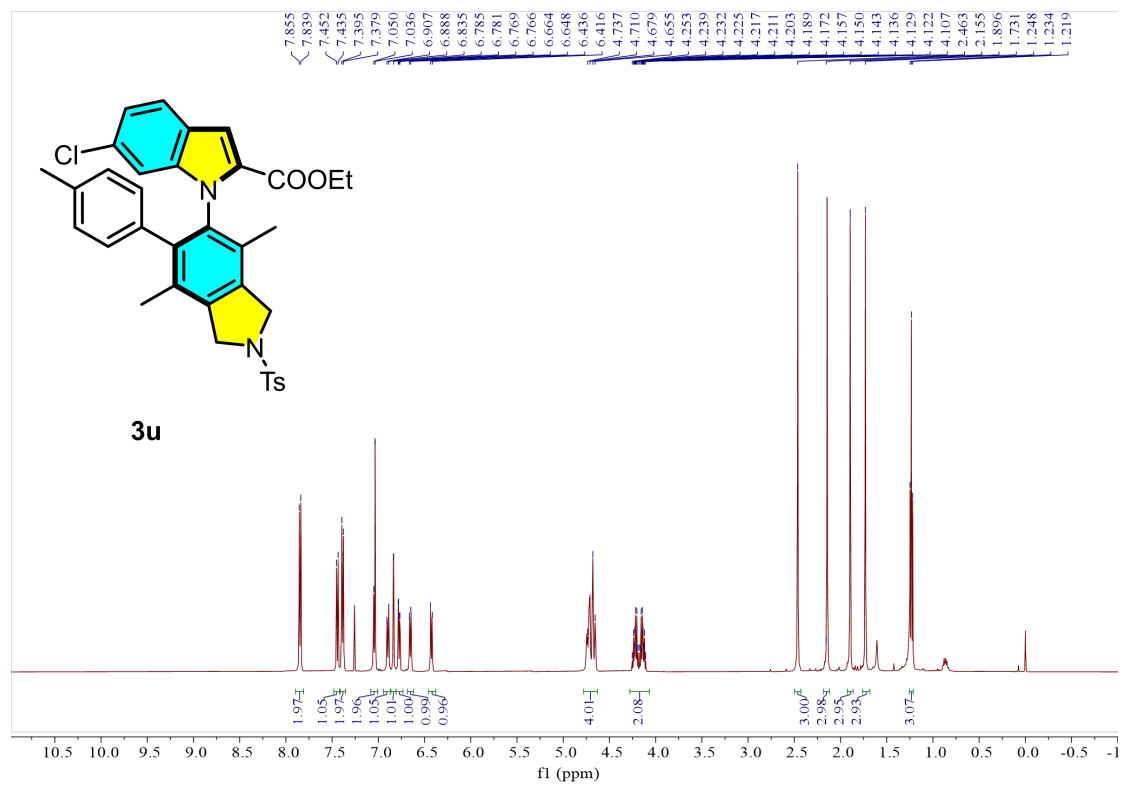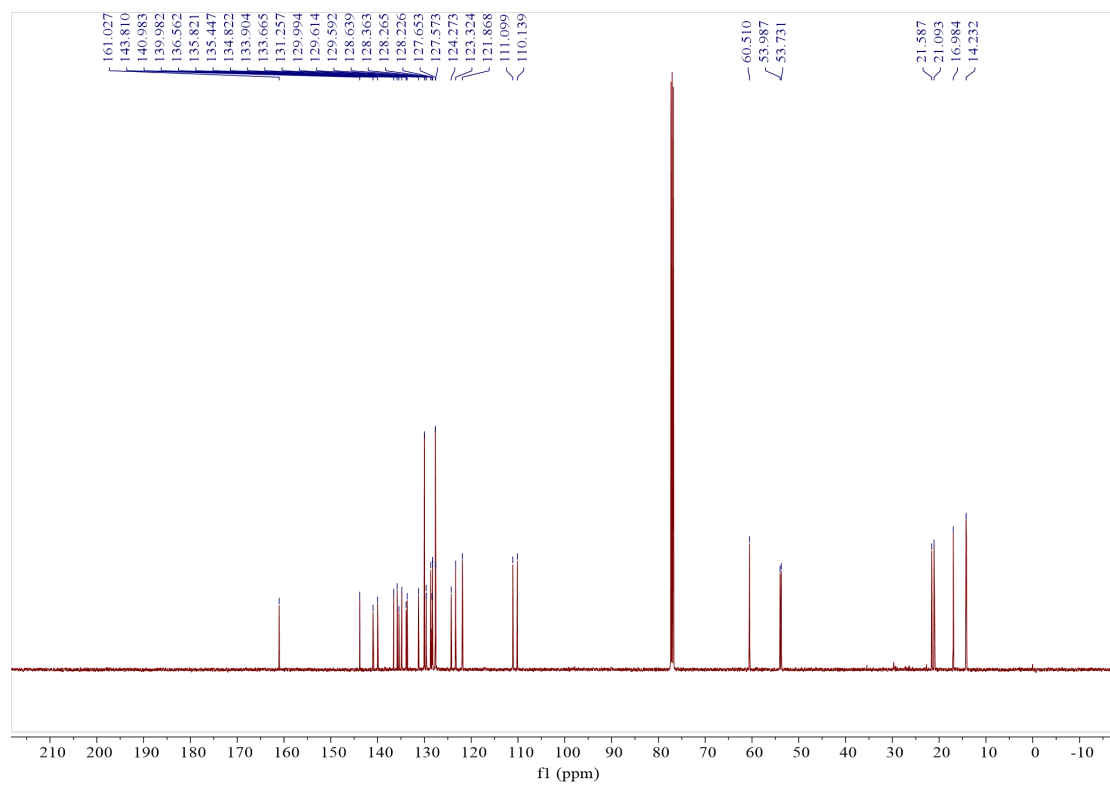

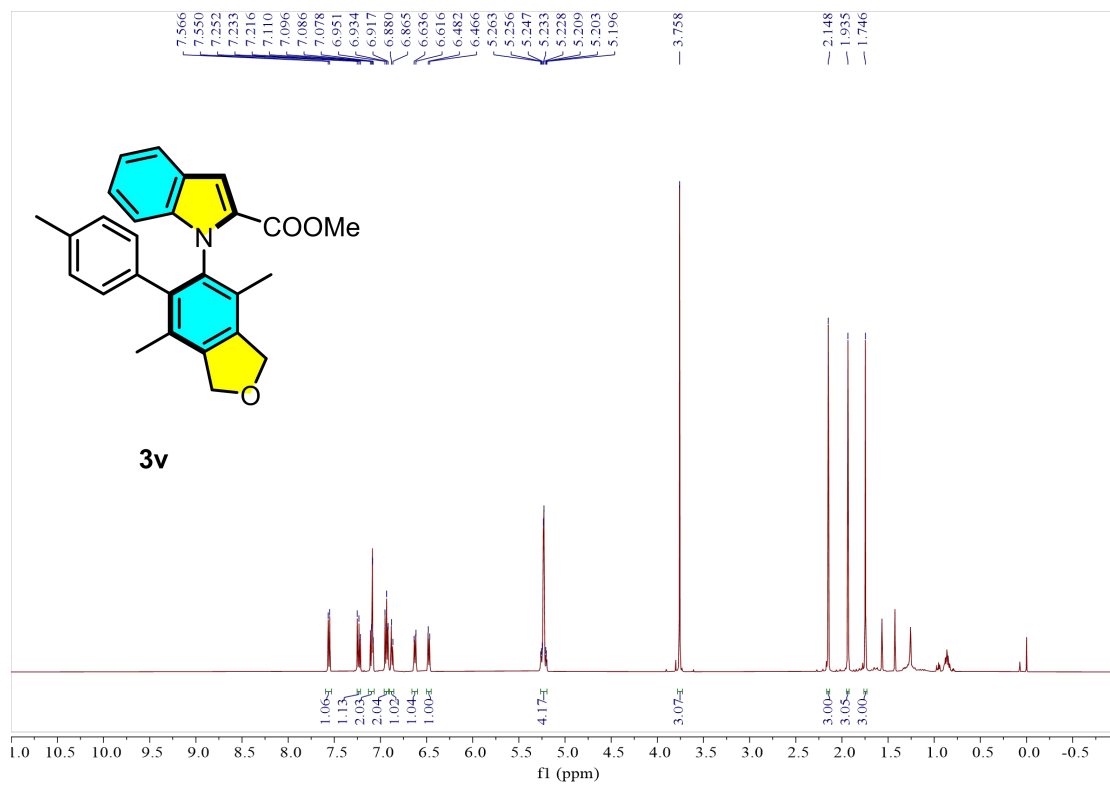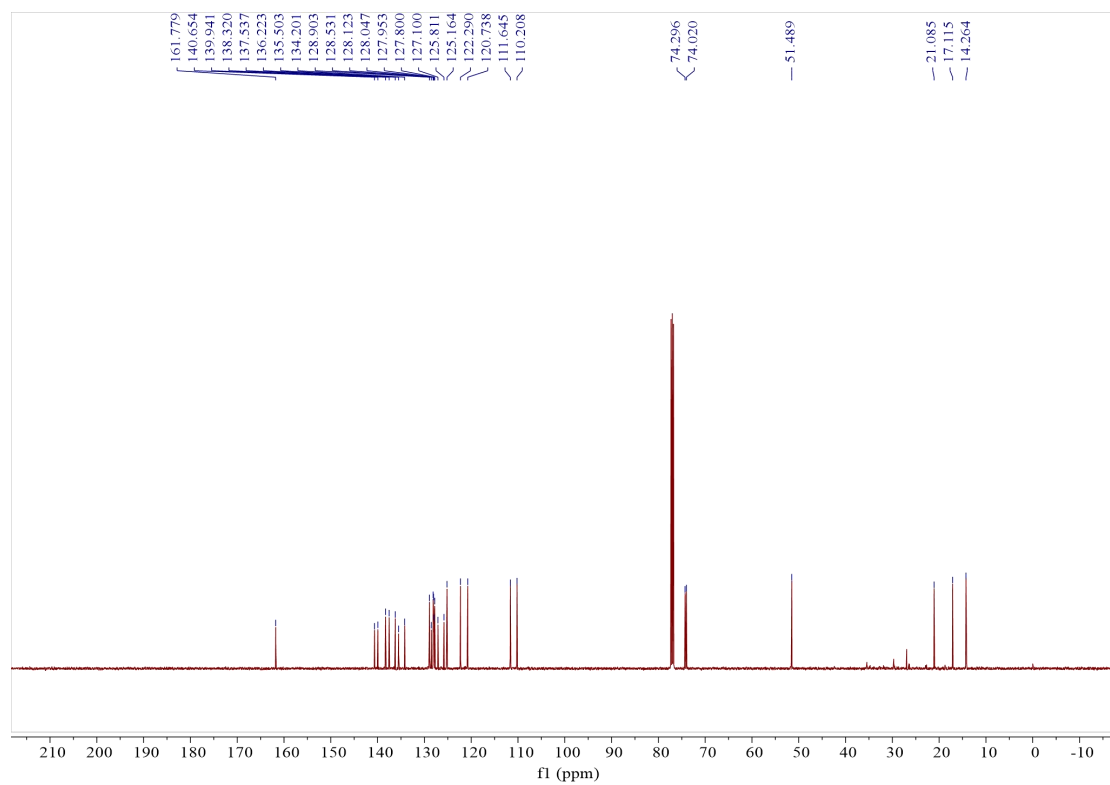



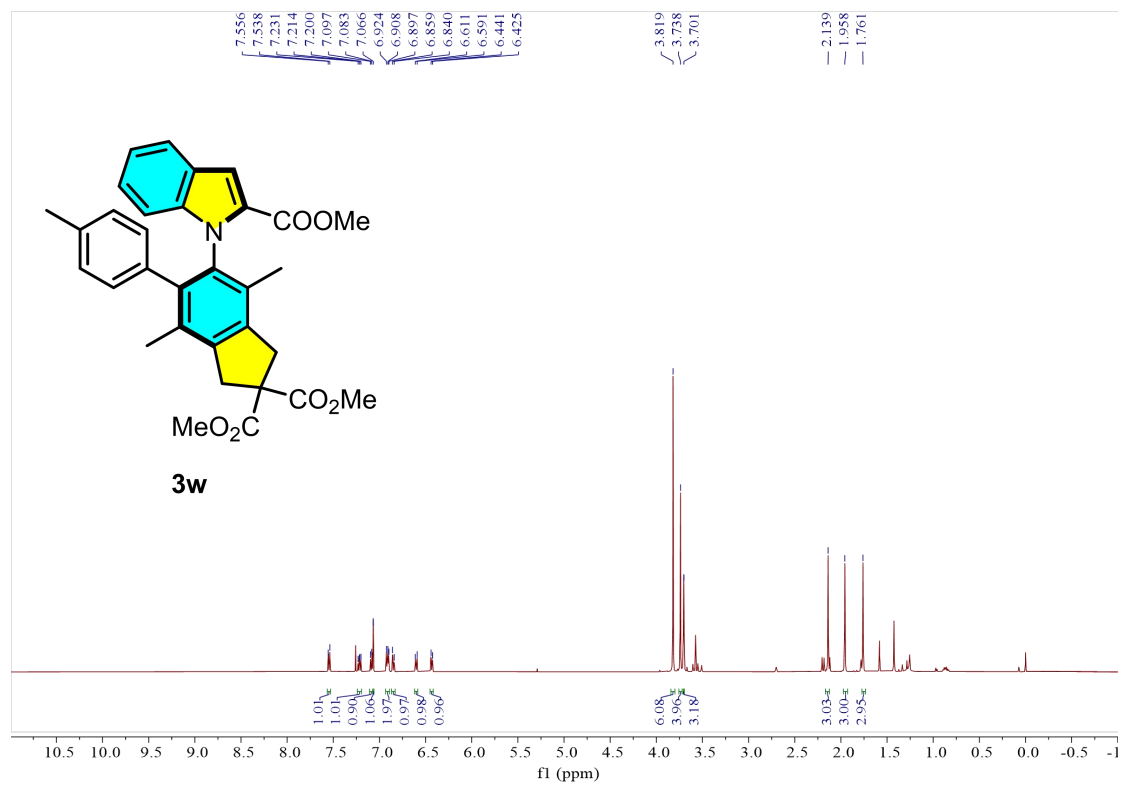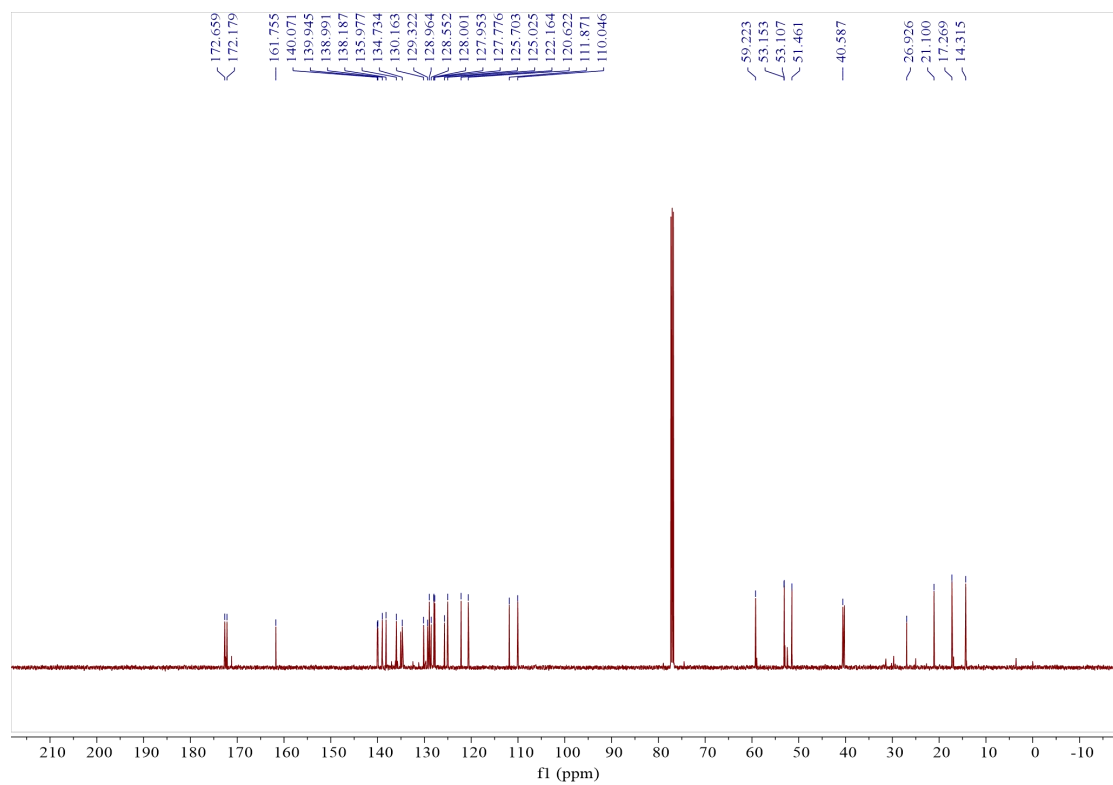

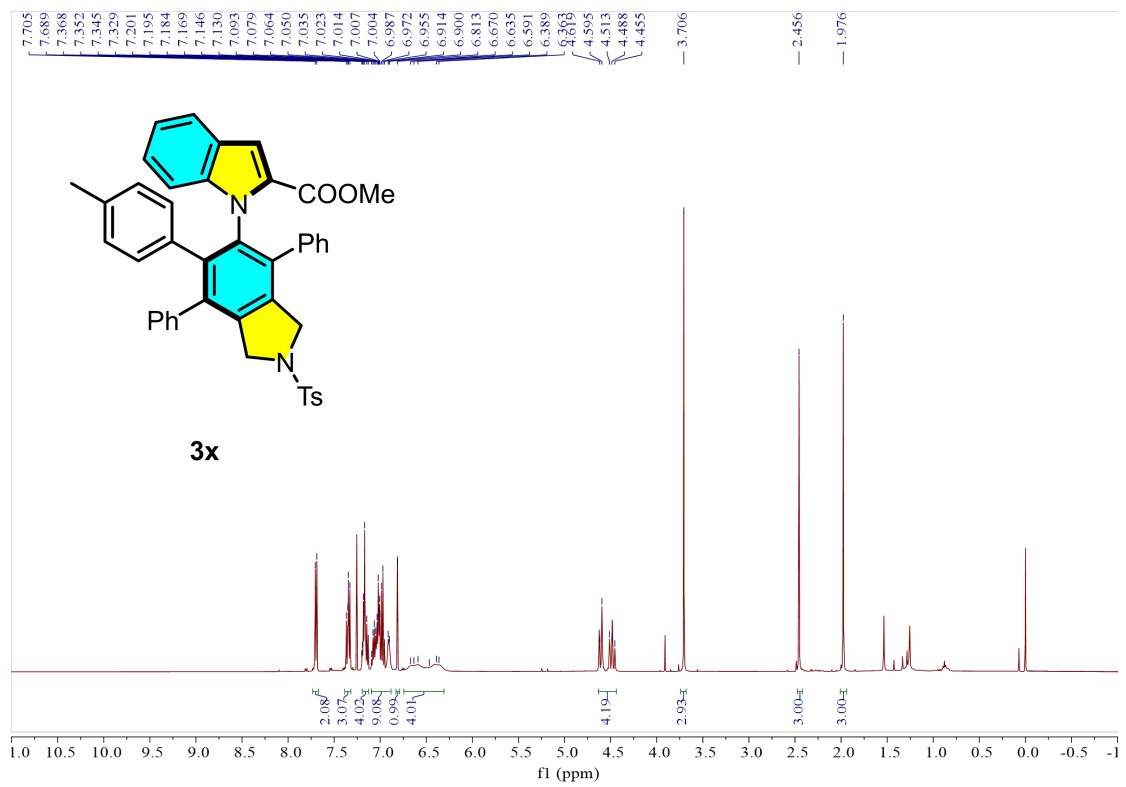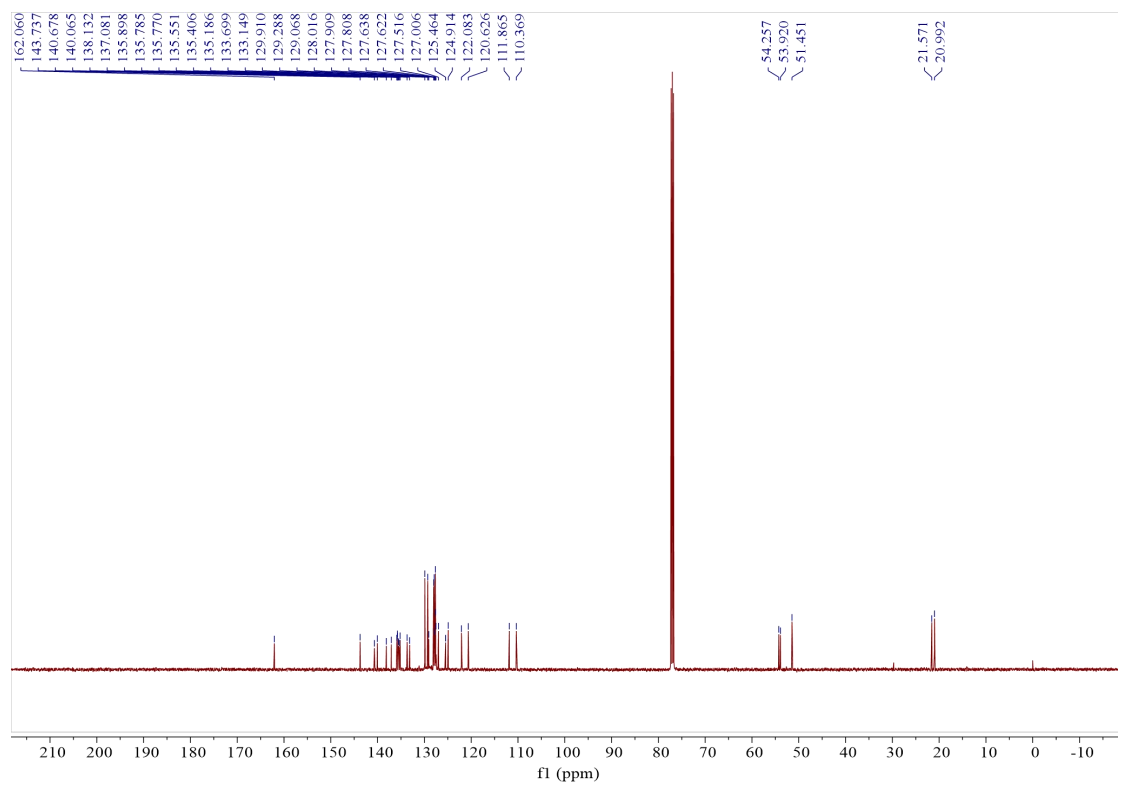

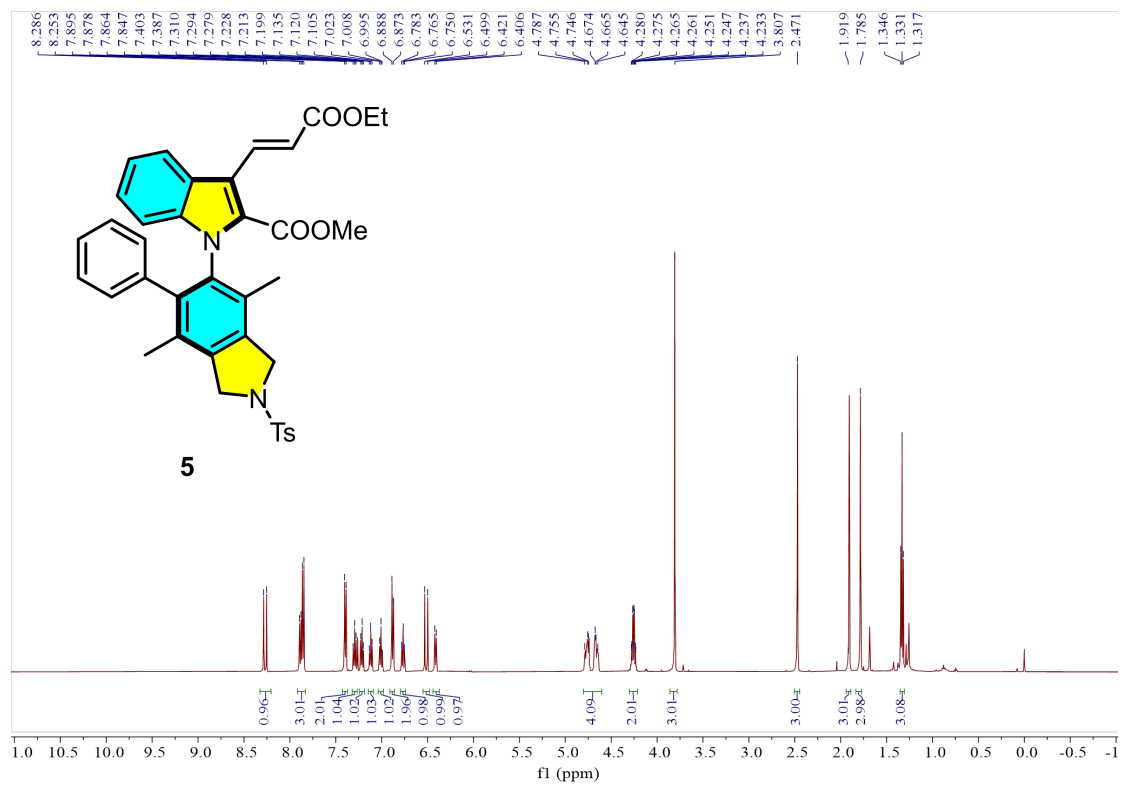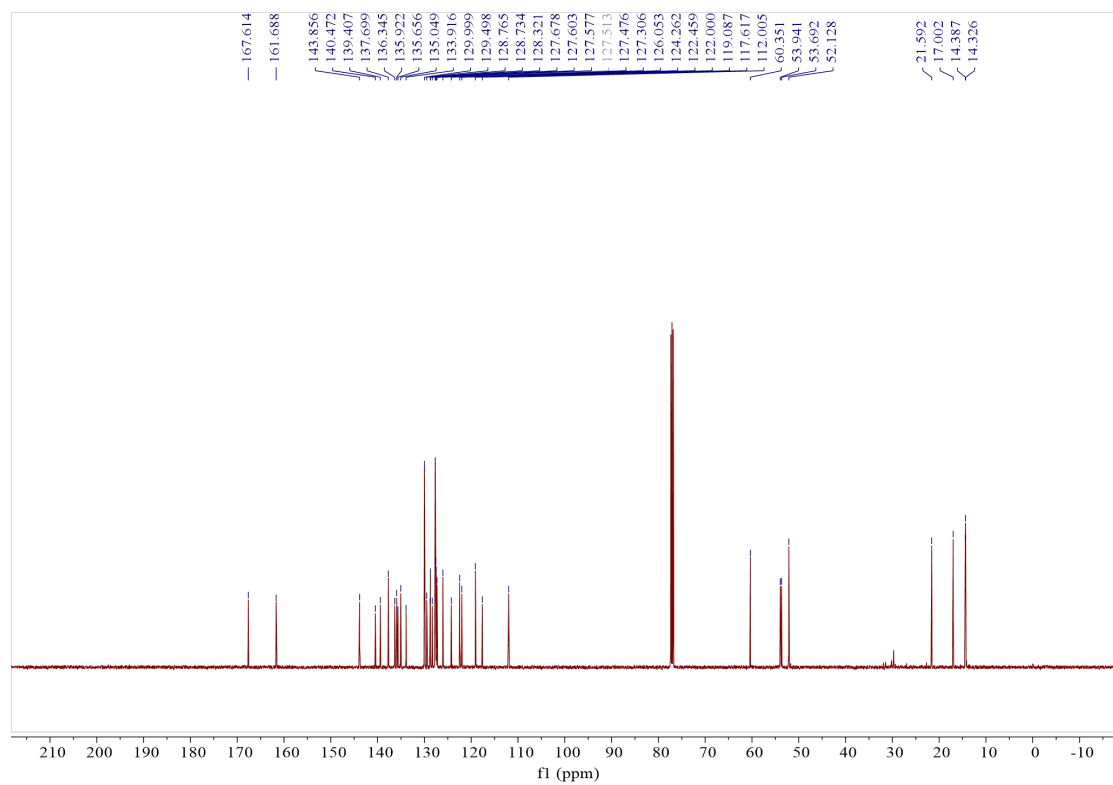

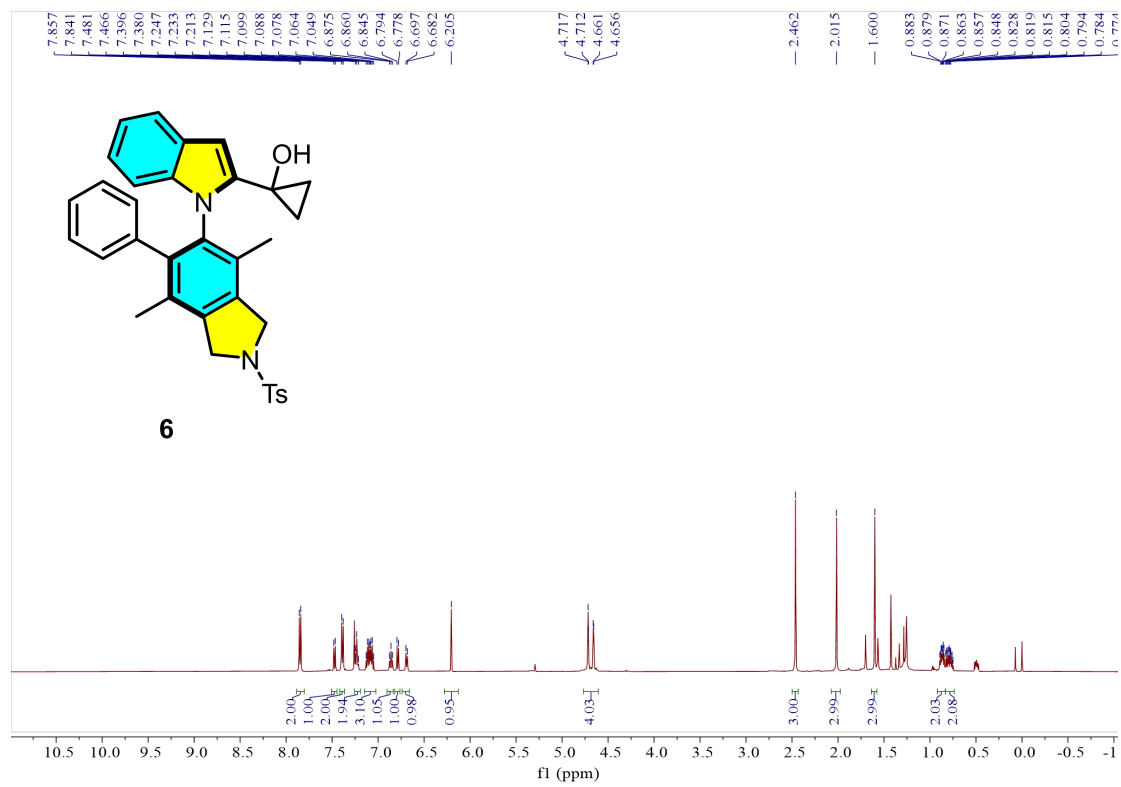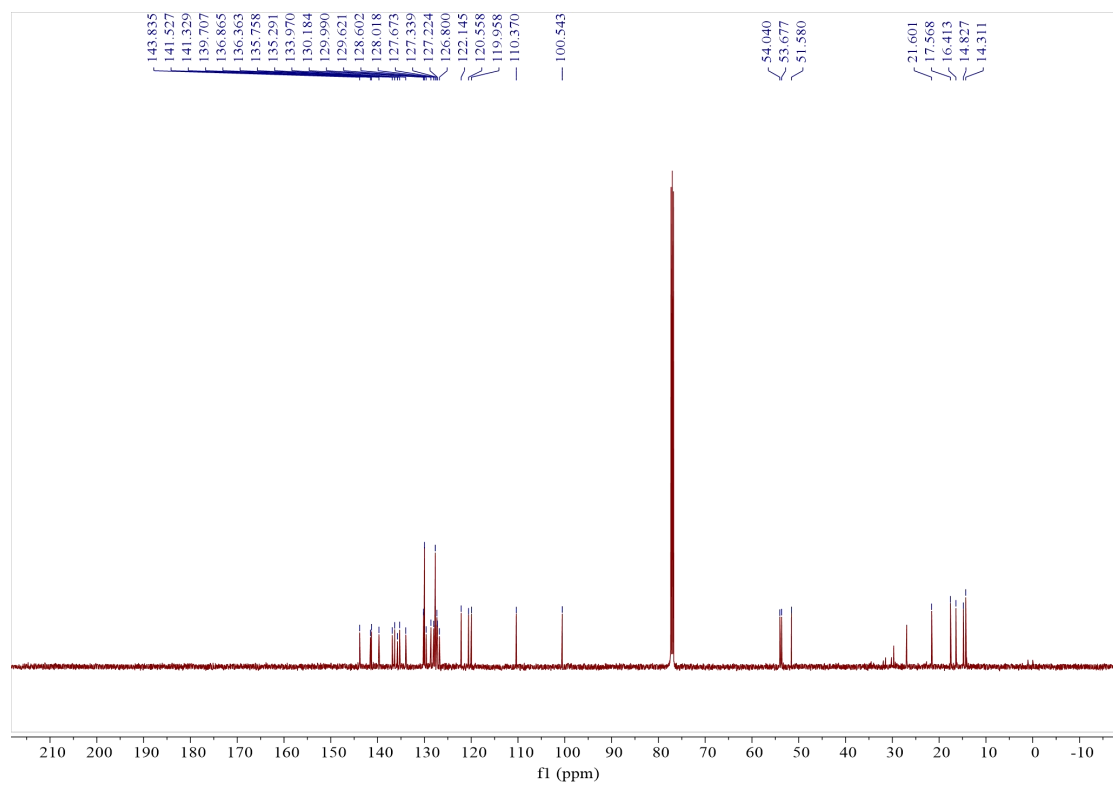

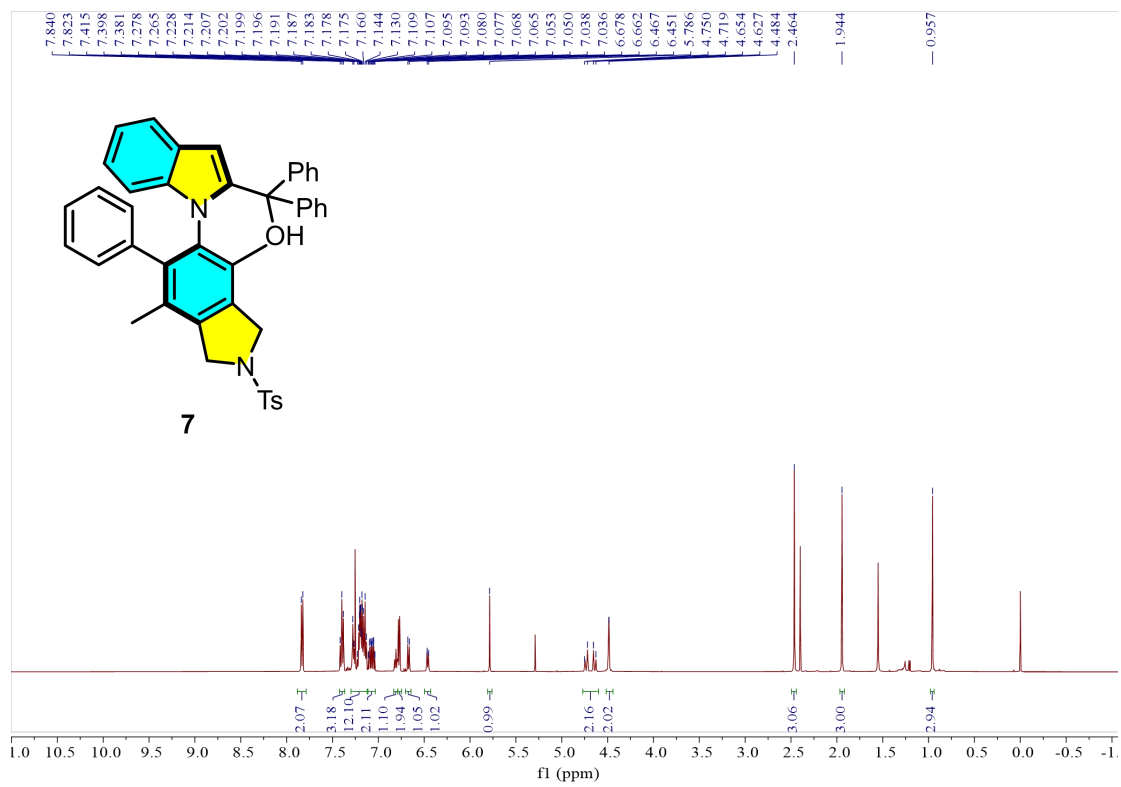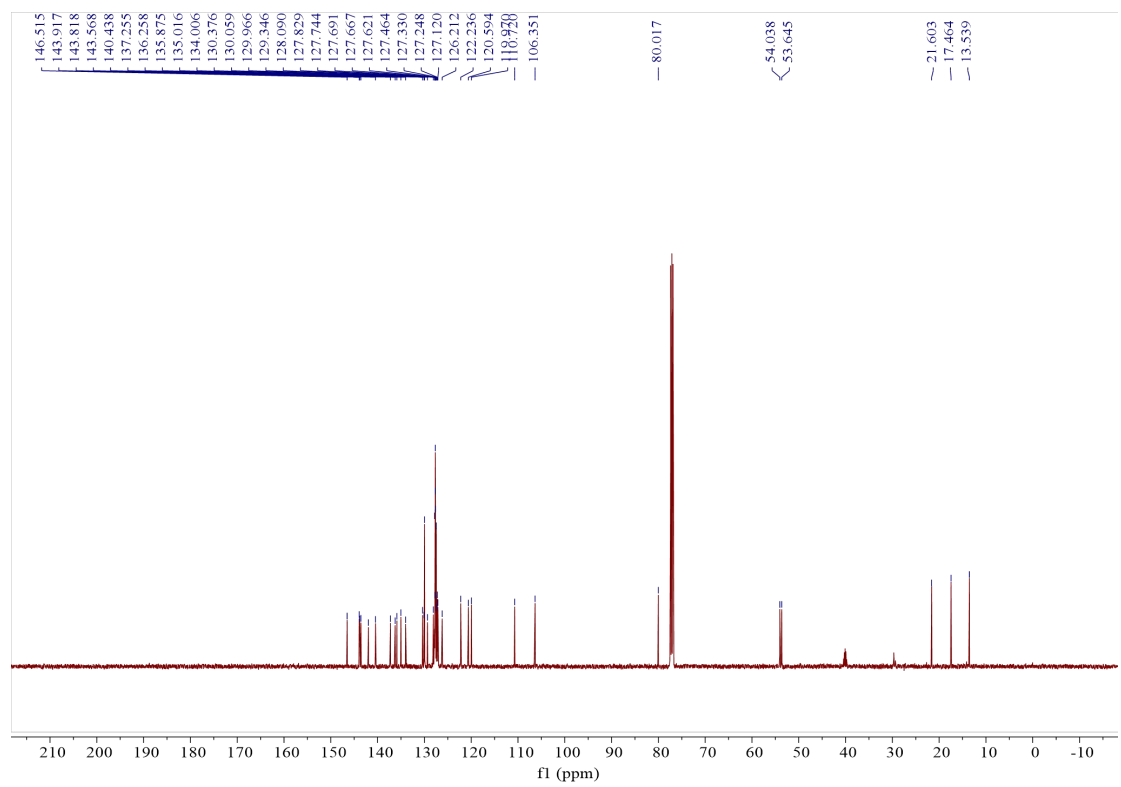

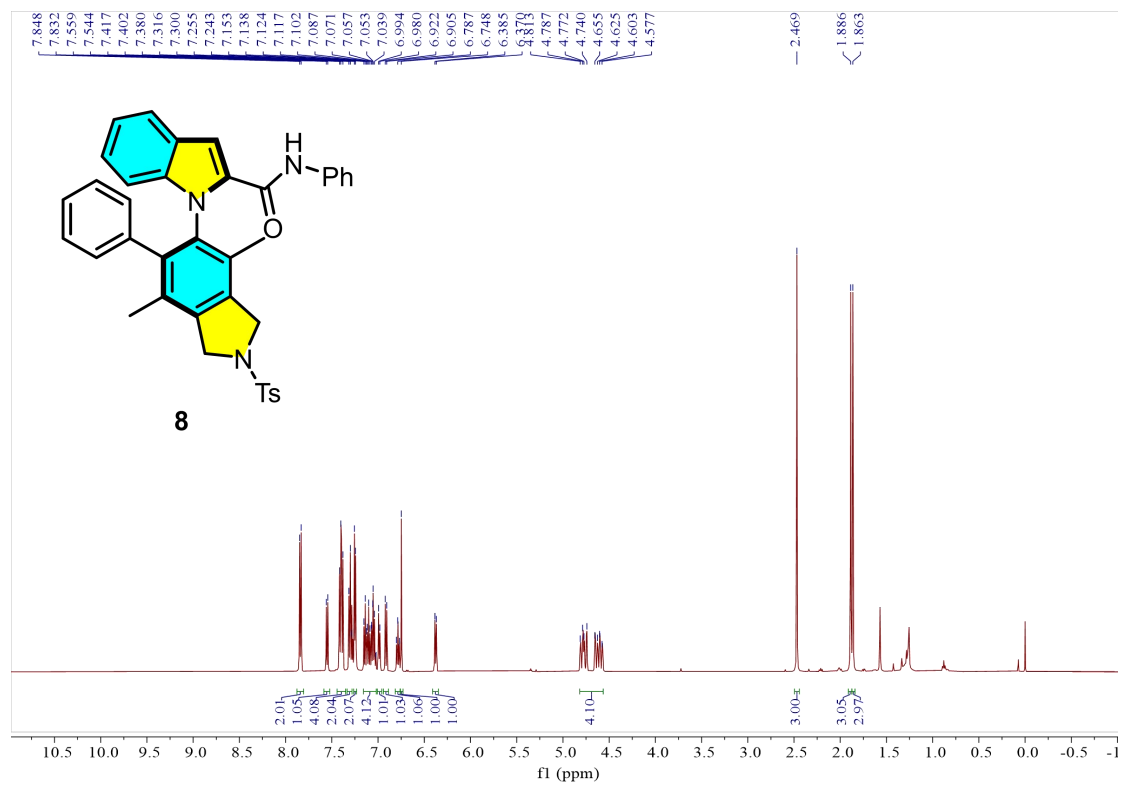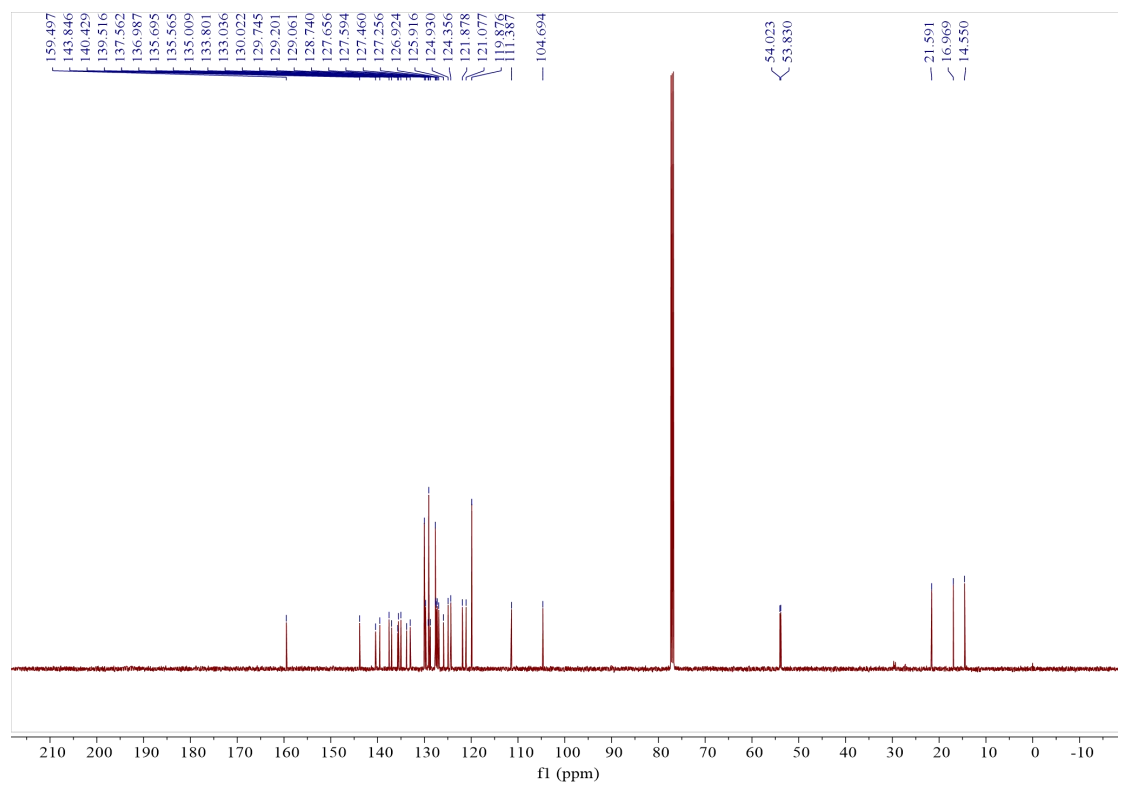

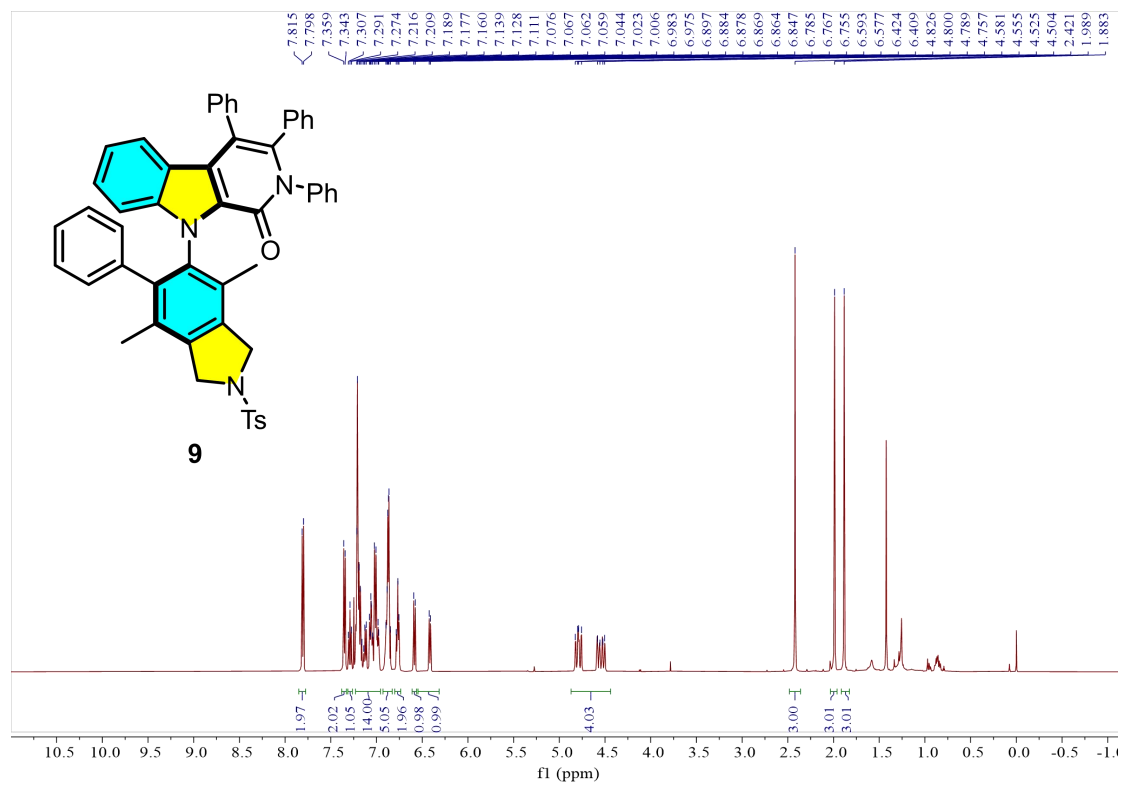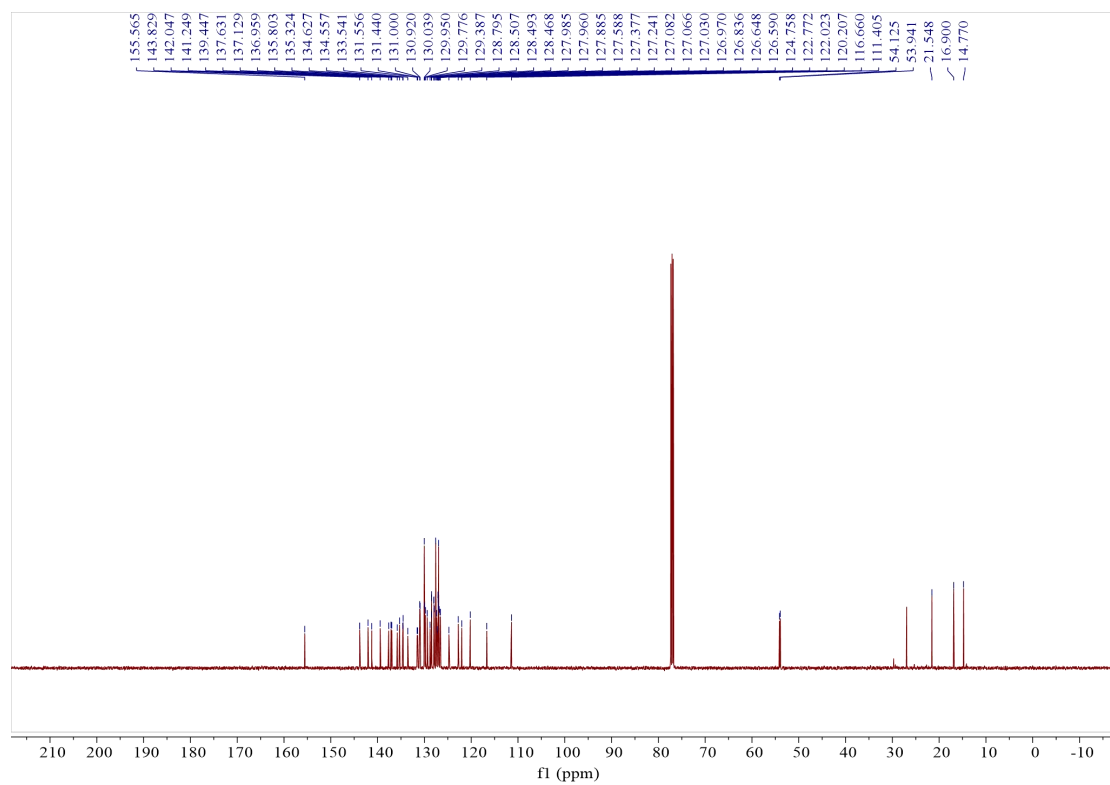

## 9. References

1. Zhang, Y.; Hsung, R. P.; Tracey, M. R.; Kurtz, K. C. M.; Vera, E. L., Copper Sulfate-Pentahydrate-1,10-Phenanthroline Catalyzed Amidations of Alkynyl Bromides. Synthesis of Heteroaromatic Amine Substituted Ynamides. *Org. Lett.* **2004**, *6*, 1151-1154.
2. Ye, F.; Haddad, M.; Michelet, V.; Ratovelomanana-Vidal, V., Solvent-free ruthenium trichloride-mediated [2+2+2] cycloaddition of  $\alpha,\omega$ -diynes and cyanamides: a convenient access to 2-aminopyridines. *Org. Chem. Front.* **2017**, *4*, 1063-1068.
3. Roy, B.; Mondal, D.; Hatai, J.; Bandyopadhyay, S., A highly efficient tandem [3+2] "click" cycloaddition/6-exo-cyclization strategy for the construction of triazole fused pyrazines. *RSC Adv.* **2014**, *4*, 56952-56956.
4. Amatore, M.; Lebœuf, D.; Malacria, M.; Gandon, V.; Aubert, C., Highly Enantioselective Rhodium-Catalyzed [2+2+2] Cycloaddition of Diynes to Sulfonimines. *J. Am. Chem. Soc.* **2013**, *135*, 4576-4579.
